# Supplementary material for: Expression Profile of Genes Related to the Th17 Pathway in Macrophages Infected by Leishmania major and Leishmania amazonensis: The Use of Gene Regulatory Networks in Modeling This Pathway
Source: Front Cell Infect Microbiol. 2022 Jun 14;12:826523. doi: 10.3389/fcimb.2022.826523 (PMC9239034; doi:10.3389/fcimb.2022.826523)
Supplement: Supplementary file 2 [file Table_1.xlsx]

## Sheet: Cluster 1
Name	Connections	Default Classes	Gene_ID	Gene_description	MCL_1.7_6
ENSG00000000457.14	106	No Class	SCYL3	SCY1 like pseudokinase 3	Cluster001
ENSG00000002330.13	4	No Class	BAD	BCL2 associated agonist of cell death	Cluster001
ENSG00000002919.14	36	No Class	SNX11	sorting nexin 11	Cluster001
ENSG00000003400.15	153	No Class	CASP10	caspase 10	Cluster001
ENSG00000004399.12	137	No Class	PLXND1	plexin D1	Cluster001
ENSG00000004766.17	42	No Class	VPS50	VPS50 subunit of EARP/GARPII complex	Cluster001
ENSG00000004975.12	17	No Class	DVL2	dishevelled segment polarity protein 2	Cluster001
ENSG00000005206.17	92	No Class	SPPL2B	signal peptide peptidase like 2B	Cluster001
ENSG00000005469.11	111	No Class	CROT	carnitine O-octanoyltransferase	Cluster001
ENSG00000005810.18	8	No Class	MYCBP2	MYC binding protein 2	Cluster001
ENSG00000005810.18.1	22	No Class	MYCBP2	MYC binding protein 2	Cluster001
ENSG00000006007.12	222	No Class	GDE1	glycerophosphodiester phosphodiesterase 1	Cluster001
ENSG00000006744.19	129	No Class	ELAC2	elaC ribonuclease Z 2	Cluster001
ENSG00000007541.16	217	No Class	PIGQ	phosphatidylinositol glycan anchor biosynthesis class Q	Cluster001
ENSG00000008130.15	222	No Class	NADK	NAD kinase	Cluster001
ENSG00000010017.13	17	No Class	RANBP9	RAN binding protein 9	Cluster001
ENSG00000010165.20	7	No Class	EEF1AKNMT	eEF1A lysine and N-terminal methyltransferase	Cluster001
ENSG00000010292.13	23	No Class	NCAPD2	non-SMC condensin I complex subunit D2	Cluster001
ENSG00000010295.19	175	No Class	IFFO1	intermediate filament family orphan 1	Cluster001
ENSG00000010322.16	30	No Class	NISCH	nischarin	Cluster001
ENSG00000010361.14	43	No Class	FUZ	fuzzy planar cell polarity protein	Cluster001
ENSG00000010671.15	252	No Class	BTK	Bruton tyrosine kinase	Cluster001
ENSG00000010704.18	84	No Class	HFE	homeostatic iron regulator	Cluster001
ENSG00000011009.11	5	No Class	LYPLA2	lysophospholipase 2	Cluster001
ENSG00000011143.17	30	No Class	MKS1	MKS transition zone complex subunit 1	Cluster001
ENSG00000011258.16	118	No Class	MBTD1	mbt domain containing 1	Cluster001
ENSG00000013288.9	63	No Class	MAN2B2	mannosidase alpha class 2B member 2	Cluster001
ENSG00000013573.17	14	No Class	DDX11	DEAD/H-box helicase 11	Cluster001
ENSG00000013810.19	131	No Class	TACC3	transforming acidic coiled-coil containing protein 3	Cluster001
ENSG00000014123.10	38	No Class	UFL1	UFM1 specific ligase 1	Cluster001
ENSG00000014123.10.1	43	No Class	UFL1	UFM1 specific ligase 1	Cluster001
ENSG00000014138.9	11	No Class	POLA2	DNA polymerase alpha 2. accessory subunit	Cluster001
ENSG00000014919.12	189	No Class	COX15	cytochrome c oxidase assembly homolog COX15	Cluster001
ENSG00000015285.11	243	No Class	WAS	WASP actin nucleation promoting factor	Cluster001
ENSG00000015532.10	17	No Class	XYLT2	xylosyltransferase 2	Cluster001
ENSG00000015676.18	47	No Class	NUDCD3	NudC domain containing 3	Cluster001
ENSG00000016864.18	336	No Class	GLT8D1	glycosyltransferase 8 domain containing 1	Cluster001
ENSG00000017797.13	207	No Class	RALBP1	ralA binding protein 1	Cluster001
ENSG00000020256.20	54	No Class	ZFP64	ZFP64 zinc finger protein	Cluster001
ENSG00000023516.9	274	No Class	AKAP11	A-kinase anchoring protein 11	Cluster001
ENSG00000024862.17	16	No Class	CCDC28A	coiled-coil domain containing 28A	Cluster001
ENSG00000026036.22	1	No Class	RTEL1-TNFRSF6B	RTEL1-TNFRSF6B readthrough (NMD candidate)	Cluster001
ENSG00000027697.14	23	No Class	IFNGR1	interferon gamma receptor 1	Cluster001
ENSG00000031823.14	87	No Class	RANBP3	RAN binding protein 3	Cluster001
ENSG00000032219.19	120	No Class	ARID4A	AT-rich interaction domain 4A	Cluster001
ENSG00000033627.16	144	No Class	ATP6V0A1	ATPase H+ transporting V0 subunit a1	Cluster001
ENSG00000037042.9	70	No Class	TUBG2	tubulin gamma 2	Cluster001
ENSG00000037637.11	89	No Class	FBXO42	F-box protein 42	Cluster001
ENSG00000037757.14	42	No Class	MRI1	methylthioribose-1-phosphate isomerase 1	Cluster001
ENSG00000038274.17	152	No Class	MAT2B	methionine adenosyltransferase 2B	Cluster001
ENSG00000040933.15	289	No Class	INPP4A	inositol polyphosphate-4-phosphatase type I A	Cluster001
ENSG00000041880.14	1	No Class	PARP3	poly(ADP-ribose) polymerase family member 3	Cluster001
ENSG00000042317.17	191	No Class	AL049834.1	spermatogenesis associated 7	Cluster001
ENSG00000044090.9	23	No Class	CUL7	cullin 7	Cluster001
ENSG00000047346.12	23	No Class	FAM214A	family with sequence similarity 214 member A	Cluster001
ENSG00000048392.12	1	No Class	RRM2B	ribonucleotide reductase regulatory TP53 inducible subunit M2B	Cluster001
ENSG00000050130.18	33	No Class	JKAMP	JNK1/MAPK8 associated membrane protein	Cluster001
ENSG00000051108.15	3	No Class	HERPUD1	homocysteine inducible ER protein with ubiquitin like domain 1	Cluster001
ENSG00000056050.7	65	No Class	HPF1	histone PARylation factor 1	Cluster001
ENSG00000058799.15	72	No Class	YIPF1	Yip1 domain family member 1	Cluster001
ENSG00000059122.16	92	No Class	FLYWCH1	FLYWCH-type zinc finger 1	Cluster001
ENSG00000060749.15	7	No Class	QSER1	glutamine and serine rich 1	Cluster001
ENSG00000063176.16	53	No Class	SPHK2	sphingosine kinase 2	Cluster001
ENSG00000064012.22	20	No Class	CASP8	caspase 8	Cluster001
ENSG00000064999.15	7	No Class	ANKS1A	ankyrin repeat and sterile alpha motif domain containing 1A	Cluster001
ENSG00000065029.15	202	No Class	ZNF76	zinc finger protein 76	Cluster001
ENSG00000065243.20	56	No Class	PKN2	protein kinase N2	Cluster001
ENSG00000065457.10	137	No Class	ADAT1	adenosine deaminase tRNA specific 1	Cluster001
ENSG00000065970.9	142	No Class	FOXJ2	forkhead box J2	Cluster001
ENSG00000066135.13	128	No Class	KDM4A	lysine demethylase 4A	Cluster001
ENSG00000067248.10	56	No Class	DHX29	DExH-box helicase 29	Cluster001
ENSG00000068724.17	13	No Class	TTC7A	tetratricopeptide repeat domain 7A	Cluster001
ENSG00000068784.13	4	No Class	SRBD1	S1 RNA binding domain 1	Cluster001
ENSG00000068971.14	37	No Class	PPP2R5B	protein phosphatase 2 regulatory subunit B beta	Cluster001
ENSG00000069248.12	100	No Class	NUP133	nucleoporin 133	Cluster001
ENSG00000069493.15	7	No Class	CLEC2D	C-type lectin domain family 2 member D	Cluster001
ENSG00000070190.13	91	No Class	DAPP1	dual adaptor of phosphotyrosine and 3-phosphoinositides 1	Cluster001
ENSG00000070718.12	6	No Class	AP3M2	adaptor related protein complex 3 subunit mu 2	Cluster001
ENSG00000071894.17	48	No Class	CPSF1	cleavage and polyadenylation specific factor 1	Cluster001
ENSG00000072121.16	5	No Class	ZFYVE26	zinc finger FYVE-type containing 26	Cluster001
ENSG00000072135.13	328	No Class	PTPN18	protein tyrosine phosphatase non-receptor type 18	Cluster001
ENSG00000072736.19	182	No Class	NFATC3	nuclear factor of activated T cells 3	Cluster001
ENSG00000073331.18	4	No Class	ALPK1	alpha kinase 1	Cluster001
ENSG00000074582.14	13	No Class	BCS1L	BCS1 homolog. ubiquinol-cytochrome c reductase complex chaperone	Cluster001
ENSG00000074621.14	29	No Class	SLC24A1	solute carrier family 24 member 1	Cluster001
ENSG00000075089.9	154	No Class	ACTR6	actin related protein 6	Cluster001
ENSG00000075188.9	18	No Class	NUP37	nucleoporin 37	Cluster001
ENSG00000075303.13	6	No Class	SLC25A40	solute carrier family 25 member 40	Cluster001
ENSG00000075399.14	4	No Class	VPS9D1	VPS9 domain containing 1	Cluster001
ENSG00000075539.15	18	No Class	FRYL	FRY like transcription coactivator	Cluster001
ENSG00000076513.17	382	No Class	ANKRD13A	ankyrin repeat domain 13A	Cluster001
ENSG00000077097.15	116	No Class	TOP2B	DNA topoisomerase II beta	Cluster001
ENSG00000077454.16	254	No Class	LRCH4	leucine rich repeats and calponin homology domain containing 4	Cluster001
ENSG00000077514.9	147	No Class	POLD3	DNA polymerase delta 3. accessory subunit	Cluster001
ENSG00000078070.13	12	No Class	MCCC1	methylcrotonoyl-CoA carboxylase 1	Cluster001
ENSG00000078403.17	5	No Class	MLLT10	MLLT10 histone lysine methyltransferase DOT1L cofactor	Cluster001
ENSG00000078674.17	63	No Class	PCM1	pericentriolar material 1	Cluster001
ENSG00000078699.21	76	No Class	CBFA2T2	CBFA2/RUNX1 partner transcriptional co-repressor 2	Cluster001
ENSG00000080503.24	42	No Class	SMARCA2	SWI/SNF related. matrix associated. actin dependent regulator of chromatin. subfamily a. member 2	Cluster001
ENSG00000080839.12	3	No Class	RBL1	RB transcriptional corepressor like 1	Cluster001
ENSG00000081177.18	22	No Class	EXD2	exonuclease 3 -5 domain containing 2	Cluster001
ENSG00000081237.20	65	No Class	PTPRC	protein tyrosine phosphatase receptor type C	Cluster001
ENSG00000081386.12	99	No Class	ZNF510	zinc finger protein 510	Cluster001
ENSG00000082269.16	53	No Class	FAM135A	family with sequence similarity 135 member A	Cluster001
ENSG00000082898.17	70	No Class	XPO1	exportin 1	Cluster001
ENSG00000083097.14	31	No Class	DOP1A	DOP1 leucine zipper like protein A	Cluster001
ENSG00000083290.20	33	No Class	ULK2	unc-51 like autophagy activating kinase 2	Cluster001
ENSG00000083642.19	114	No Class	PDS5B	PDS5 cohesin associated factor B	Cluster001
ENSG00000083814.13	49	No Class	ZNF671	zinc finger protein 671	Cluster001
ENSG00000083838.16	189	No Class	ZNF446	zinc finger protein 446	Cluster001
ENSG00000084070.12	39	No Class	SMAP2	small ArfGAP2	Cluster001
ENSG00000084092.7	280	No Class	NOA1	nitric oxide associated 1	Cluster001
ENSG00000084207.18	3	No Class	GSTP1	glutathione S-transferase pi 1	Cluster001
ENSG00000085982.13	49	No Class	USP40	ubiquitin specific peptidase 40	Cluster001
ENSG00000086570.12	14	No Class	FAT2	FAT atypical cadherin 2	Cluster001
ENSG00000087338.5	25	No Class	GMCL1	germ cell-less 1. spermatogenesis associated	Cluster001
ENSG00000087586.17	24	No Class	AURKA	aurora kinase A	Cluster001
ENSG00000088854.12	61	No Class	C20orf194	chromosome 20 open reading frame 194	Cluster001
ENSG00000088970.16	130	No Class	KIZ	kizuna centrosomal protein	Cluster001
ENSG00000089006.16	7	No Class	SNX5	sorting nexin 5	Cluster001
ENSG00000090238.12	60	No Class	YPEL3	yippee like 3	Cluster001
ENSG00000090686.16	160	No Class	USP48	ubiquitin specific peptidase 48	Cluster001
ENSG00000090863.11	134	No Class	GLG1	golgi glycoprotein 1	Cluster001
ENSG00000091106.19	14	No Class	NLRC4	NLR family CARD domain containing 4	Cluster001
ENSG00000091947.10	97	No Class	TMEM101	transmembrane protein 101	Cluster001
ENSG00000092036.18	37	No Class	HAUS4	HAUS augmin like complex subunit 4	Cluster001
ENSG00000092208.17	1	No Class	GEMIN2	gem nuclear organelle associated protein 2	Cluster001
ENSG00000092470.12	56	No Class	WDR76	WD repeat domain 76	Cluster001
ENSG00000092847.12	1	No Class	AGO1	argonaute RISC component 1	Cluster001
ENSG00000094914.14	84	No Class	AAAS	aladin WD repeat nucleoporin	Cluster001
ENSG00000095002.15	8	No Class	MSH2	mutS homolog 2	Cluster001
ENSG00000095321.17	125	No Class	CRAT	carnitine O-acetyltransferase	Cluster001
ENSG00000096093.16	31	No Class	EFHC1	EF-hand domain containing 1	Cluster001
ENSG00000096654.15	162	No Class	ZNF184	zinc finger protein 184	Cluster001
ENSG00000096872.16	62	No Class	IFT74	intraflagellar transport 74	Cluster001
ENSG00000096968.13	139	No Class	JAK2	Janus kinase 2	Cluster001
ENSG00000097007.19	1	No Class	ABL1	ABL proto-oncogene 1. non-receptor tyrosine kinase	Cluster001
ENSG00000099337.5	16	No Class	KCNK6	potassium two pore domain channel subfamily K member 6	Cluster001
ENSG00000099849.15	19	No Class	RASSF7	Ras association domain family member 7	Cluster001
ENSG00000099875.14	162	No Class	MKNK2	MAPK interacting serine/threonine kinase 2	Cluster001
ENSG00000099910.17	38	No Class	KLHL22	kelch like family member 22	Cluster001
ENSG00000099942.13	37	No Class	CRKL	CRK like proto-oncogene. adaptor protein	Cluster001
ENSG00000100034.14	22	No Class	PPM1F	protein phosphatase. Mg2+/Mn2+ dependent 1F	Cluster001
ENSG00000100077.15	15	No Class	GRK3	G protein-coupled receptor kinase 3	Cluster001
ENSG00000100105.18	211	No Class	PATZ1	POZ/BTB and AT hook containing zinc finger 1	Cluster001
ENSG00000100151.16	28	No Class	PICK1	protein interacting with PRKCA 1	Cluster001
ENSG00000100211.10	196	No Class	CBY1	chibby family member 1. beta catenin antagonist	Cluster001
ENSG00000100246.13	29	No Class	DNAL4	dynein axonemal light chain 4	Cluster001
ENSG00000100271.17	125	No Class	TTLL1	tubulin tyrosine ligase like 1	Cluster001
ENSG00000100296.13	33	No Class	THOC5	THO complex 5	Cluster001
ENSG00000100297.16	140	No Class	MCM5	minichromosome maintenance complex component 5	Cluster001
ENSG00000100324.14	262	No Class	TAB1	TGF-beta activated kinase 1 (MAP3K7) binding protein 1	Cluster001
ENSG00000100354.21	25	No Class	TNRC6B	trinucleotide repeat containing adaptor 6B	Cluster001
ENSG00000100359.21	188	No Class	SGSM3	small G protein signaling modulator 3	Cluster001
ENSG00000100364.18	24	No Class	KIAA0930	KIAA0930	Cluster001
ENSG00000100395.15	184	No Class	L3MBTL2	L3MBTL histone methyl-lysine binding protein 2	Cluster001
ENSG00000100429.18	32	No Class	HDAC10	histone deacetylase 10	Cluster001
ENSG00000100580.8	257	No Class	TMED8	transmembrane p24 trafficking protein family member 8	Cluster001
ENSG00000100596.6	17	No Class	SPTLC2	serine palmitoyltransferase long chain base subunit 2	Cluster001
ENSG00000100802.15	72	No Class	C14orf93	chromosome 14 open reading frame 93	Cluster001
ENSG00000100890.16	17	No Class	PRORP	protein only RNase P catalytic subunit	Cluster001
ENSG00000100949.14	53	No Class	RABGGTA	Rab geranylgeranyltransferase subunit alpha	Cluster001
ENSG00000100994.12	55	No Class	PYGB	glycogen phosphorylase B	Cluster001
ENSG00000101190.13	243	No Class	TCFL5	transcription factor like 5	Cluster001
ENSG00000101224.17	134	No Class	CDC25B	cell division cycle 25B	Cluster001
ENSG00000101350.8	37	No Class	KIF3B	kinesin family member 3B	Cluster001
ENSG00000101391.21	61	No Class	CDK5RAP1	CDK5 regulatory subunit associated protein 1	Cluster001
ENSG00000101391.21.1	61	No Class	CDK5RAP1	CDK5 regulatory subunit associated protein 1	Cluster001
ENSG00000101417.12	115	No Class	PXMP4	peroxisomal membrane protein 4	Cluster001
ENSG00000101457.13	30	No Class	DNTTIP1	deoxynucleotidyltransferase terminal interacting protein 1	Cluster001
ENSG00000101639.18	136	No Class	CEP192	centrosomal protein 192	Cluster001
ENSG00000101751.10	37	No Class	POLI	DNA polymerase iota	Cluster001
ENSG00000101916.11	13	No Class	TLR8	toll like receptor 8	Cluster001
ENSG00000102699.6	194	No Class	PARP4	poly(ADP-ribose) polymerase family member 4	Cluster001
ENSG00000102796.11	93	No Class	DHRS12	dehydrogenase/reductase 12	Cluster001
ENSG00000102981.9	41	No Class	PARD6A	par-6 family cell polarity regulator alpha	Cluster001
ENSG00000103024.7	37	No Class	NME3	NME/NM23 nucleoside diphosphate kinase 3	Cluster001
ENSG00000103051.19	37	No Class	COG4	component of oligomeric golgi complex 4	Cluster001
ENSG00000103168.16	34	No Class	TAF1C	TATA-box binding protein associated factor. RNA polymerase I subunit C	Cluster001
ENSG00000103174.13	139	No Class	NAGPA	N-acetylglucosamine-1-phosphodiester alpha-N-acetylglucosaminidase	Cluster001
ENSG00000103199.14	153	No Class	ZNF500	zinc finger protein 500	Cluster001
ENSG00000103245.14	23	No Class	CIAO3	cytosolic iron-sulfur assembly component 3	Cluster001
ENSG00000103248.19	82	No Class	MTHFSD	methenyltetrahydrofolate synthetase domain containing	Cluster001
ENSG00000103249.18	123	No Class	CLCN7	chloride voltage-gated channel 7	Cluster001
ENSG00000103343.13	183	No Class	ZNF174	zinc finger protein 174	Cluster001
ENSG00000103351.13	112	No Class	CLUAP1	clusterin associated protein 1	Cluster001
ENSG00000103479.16	143	No Class	RBL2	RB transcriptional corepressor like 2	Cluster001
ENSG00000103495.14	49	No Class	MAZ	MYC associated zinc finger protein	Cluster001
ENSG00000103540.16	94	No Class	CCP110	centriolar coiled-coil protein 110	Cluster001
ENSG00000103653.16	36	No Class	CSK	C-terminal Src kinase	Cluster001
ENSG00000103657.14	5	No Class	HERC1	HECT and RLD domain containing E3 ubiquitin protein ligase family member 1	Cluster001
ENSG00000103994.17	40	No Class	ZNF106	zinc finger protein 106	Cluster001
ENSG00000104047.15	19	No Class	DTWD1	DTW domain containing 1	Cluster001
ENSG00000104205.15	67	No Class	SGK3	serum/glucocorticoid regulated kinase family member 3	Cluster001
ENSG00000104228.13	3	No Class	TRIM35	tripartite motif containing 35	Cluster001
ENSG00000104442.10	2	No Class	ARMC1	armadillo repeat containing 1	Cluster001
ENSG00000104447.12	57	No Class	TRPS1	transcriptional repressor GATA binding 1	Cluster001
ENSG00000104518.11	5	No Class	GSDMD	gasdermin D	Cluster001
ENSG00000104738.18	1	No Class	MCM4	minichromosome maintenance complex component 4	Cluster001
ENSG00000104863.12	26	No Class	LIN7B	lin-7 homolog B. crumbs cell polarity complex component	Cluster001
ENSG00000104884.15	78	No Class	ERCC2	ERCC excision repair 2. TFIIH core complex helicase subunit	Cluster001
ENSG00000104889.6	17	No Class	RNASEH2A	ribonuclease H2 subunit A	Cluster001
ENSG00000104903.5	96	No Class	LYL1	LYL1 basic helix-loop-helix family member	Cluster001
ENSG00000104973.18	100	No Class	MED25	mediator complex subunit 25	Cluster001
ENSG00000104983.8	56	No Class	CCDC61	coiled-coil domain containing 61	Cluster001
ENSG00000105136.20	12	No Class	ZNF419	zinc finger protein 419	Cluster001
ENSG00000105287.12	15	No Class	PRKD2	protein kinase D2	Cluster001
ENSG00000105483.18	207	No Class	CARD8	caspase recruitment domain family member 8	Cluster001
ENSG00000105514.8	20	No Class	RAB3D	RAB3D. member RAS oncogene family	Cluster001
ENSG00000105643.10	152	No Class	ARRDC2	arrestin domain containing 2	Cluster001
ENSG00000105662.16	116	No Class	CRTC1	CREB regulated transcription coactivator 1	Cluster001
ENSG00000105705.16	175	No Class	SUGP1	SURP and G-patch domain containing 1	Cluster001
ENSG00000105875.14	127	No Class	WDR91	WD repeat domain 91	Cluster001
ENSG00000106009.16	186	No Class	BRAT1	BRCA1 associated ATM activator 1	Cluster001
ENSG00000106009.16.1	186	No Class	BRAT1	BRCA1 associated ATM activator 1	Cluster001
ENSG00000106012.18	42	No Class	IQCE	IQ motif containing E	Cluster001
ENSG00000106100.11	36	No Class	NOD1	nucleotide binding oligomerization domain containing 1	Cluster001
ENSG00000106144.20	337	No Class	CASP2	caspase 2	Cluster001
ENSG00000106290.15	70	No Class	TAF6	TATA-box binding protein associated factor 6	Cluster001
ENSG00000106460.19	45	No Class	TMEM106B	transmembrane protein 106B	Cluster001
ENSG00000106479.11	80	No Class	ZNF862	zinc finger protein 862	Cluster001
ENSG00000106733.21	96	No Class	NMRK1	nicotinamide riboside kinase 1	Cluster001
ENSG00000106780.9	264	No Class	MEGF9	multiple EGF like domains 9	Cluster001
ENSG00000106948.16	68	No Class	AKNA	AT-hook transcription factor	Cluster001
ENSG00000107036.12	225	No Class	RIC1	RIC1 homolog. RAB6A GEF complex partner 1	Cluster001
ENSG00000107099.15	128	No Class	DOCK8	dedicator of cytokinesis 8	Cluster001
ENSG00000107290.14	221	No Class	SETX	senataxin	Cluster001
ENSG00000107672.15	180	No Class	NSMCE4A	NSE4 homolog A. SMC5-SMC6 complex component	Cluster001
ENSG00000107672.15.1	170	No Class	NSMCE4A	NSE4 homolog A. SMC5-SMC6 complex component	Cluster001
ENSG00000107738.20	64	No Class	VSIR	V-set immunoregulatory receptor	Cluster001
ENSG00000107864.15	9	No Class	CPEB3	cytoplasmic polyadenylation element binding protein 3	Cluster001
ENSG00000107897.19	4	No Class	ACBD5	acyl-CoA binding domain containing 5	Cluster001
ENSG00000108091.11	30	No Class	CCDC6	coiled-coil domain containing 6	Cluster001
ENSG00000108187.16	108	No Class	PBLD	phenazine biosynthesis like protein domain containing	Cluster001
ENSG00000108262.15	48	No Class	GIT1	GIT ArfGAP 1	Cluster001
ENSG00000108312.15	135	No Class	UBTF	upstream binding transcription factor	Cluster001
ENSG00000108389.9	11	No Class	MTMR4	myotubularin related protein 4	Cluster001
ENSG00000108439.10	6	No Class	PNPO	pyridoxamine 5 -phosphate oxidase	Cluster001
ENSG00000108465.15	144	No Class	CDK5RAP3	CDK5 regulatory subunit associated protein 3	Cluster001
ENSG00000108469.15	157	No Class	RECQL5	RecQ like helicase 5	Cluster001
ENSG00000108599.15	80	No Class	AKAP10	A-kinase anchoring protein 10	Cluster001
ENSG00000108604.16	57	No Class	SMARCD2	SWI/SNF related. matrix associated. actin dependent regulator of chromatin. subfamily d. member 2	Cluster001
ENSG00000108666.10	9	No Class	C17orf75	chromosome 17 open reading frame 75	Cluster001
ENSG00000108733.10	21	No Class	PEX12	peroxisomal biogenesis factor 12	Cluster001
ENSG00000108771.13	197	No Class	DHX58	DExH-box helicase 58	Cluster001
ENSG00000108786.10	83	No Class	HSD17B1	hydroxysteroid 17-beta dehydrogenase 1	Cluster001
ENSG00000108819.11	107	No Class	PPP1R9B	protein phosphatase 1 regulatory subunit 9B	Cluster001
ENSG00000108840.15	186	No Class	HDAC5	histone deacetylase 5	Cluster001
ENSG00000109016.17	59	No Class	DHRS7B	dehydrogenase/reductase 7B	Cluster001
ENSG00000109103.12	173	No Class	UNC119	unc-119 lipid binding chaperone	Cluster001
ENSG00000109118.14	167	No Class	PHF12	PHD finger protein 12	Cluster001
ENSG00000109458.8	82	No Class	GAB1	GRB2 associated binding protein 1	Cluster001
ENSG00000109775.11	35	No Class	UFSP2	UFM1 specific peptidase 2	Cluster001
ENSG00000110074.11	109	No Class	FOXRED1	FAD dependent oxidoreductase domain containing 1	Cluster001
ENSG00000110274.16	99	No Class	CEP164	centrosomal protein 164	Cluster001
ENSG00000110324.10	2	No Class	IL10RA	interleukin 10 receptor subunit alpha	Cluster001
ENSG00000110583.13	71	No Class	NAA40	N(alpha)-acetyltransferase 40. NatD catalytic subunit	Cluster001
ENSG00000111203.13	32	No Class	ITFG2	integrin alpha FG-GAP repeat containing 2	Cluster001
ENSG00000111231.9	103	No Class	GPN3	GPN-loop GTPase 3	Cluster001
ENSG00000111276.11	125	No Class	CDKN1B	cyclin dependent kinase inhibitor 1B	Cluster001
ENSG00000111325.16	50	No Class	OGFOD2	2-oxoglutarate and iron dependent oxygenase domain containing 2	Cluster001
ENSG00000111361.13	104	No Class	EIF2B1	eukaryotic translation initiation factor 2B subunit alpha	Cluster001
ENSG00000111554.14	57	No Class	MDM1	Mdm1 nuclear protein	Cluster001
ENSG00000111602.12	39	No Class	TIMELESS	timeless circadian regulator	Cluster001
ENSG00000111731.12	13	No Class	C2CD5	C2 calcium dependent domain containing 5	Cluster001
ENSG00000111911.7	98	No Class	HINT3	histidine triad nucleotide binding protein 3	Cluster001
ENSG00000112062.10	193	No Class	MAPK14	mitogen-activated protein kinase 14	Cluster001
ENSG00000112079.9	23	No Class	STK38	serine/threonine kinase 38	Cluster001
ENSG00000112144.15	251	No Class	ICK	intestinal cell kinase	Cluster001
ENSG00000112234.9	201	No Class	FBXL4	F-box and leucine rich repeat protein 4	Cluster001
ENSG00000112640.15	68	No Class	PPP2R5D	protein phosphatase 2 regulatory subunit B delta	Cluster001
ENSG00000113048.16	1	No Class	MRPS27	mitochondrial ribosomal protein S27	Cluster001
ENSG00000113318.11	54	No Class	MSH3	mutS homolog 3	Cluster001
ENSG00000113328.19	13	No Class	CCNG1	cyclin G1	Cluster001
ENSG00000113522.14	23	No Class	RAD50	RAD50 double strand break repair protein	Cluster001
ENSG00000113593.12	44	No Class	PPWD1	peptidylprolyl isomerase domain and WD repeat containing 1	Cluster001
ENSG00000113597.18	12	No Class	TRAPPC13	trafficking protein particle complex 13	Cluster001
ENSG00000113851.14	19	No Class	CRBN	cereblon	Cluster001
ENSG00000114331.15	74	No Class	ACAP2	ArfGAP with coiled-coil. ankyrin repeat and PH domains 2	Cluster001
ENSG00000114346.13	29	No Class	ECT2	epithelial cell transforming 2	Cluster001
ENSG00000114388.14	144	No Class	NPRL2	NPR2 like. GATOR1 complex subunit	Cluster001
ENSG00000114735.9	13	No Class	HEMK1	HemK methyltransferase family member 1	Cluster001
ENSG00000114739.14	1	No Class	ACVR2B	activin A receptor type 2B	Cluster001
ENSG00000114853.14	72	No Class	ZBTB47	zinc finger and BTB domain containing 47	Cluster001
ENSG00000114857.18	18	No Class	NKTR	natural killer cell triggering receptor	Cluster001
ENSG00000114904.13	183	No Class	NEK4	NIMA related kinase 4	Cluster001
ENSG00000115282.20	194	No Class	TTC31	tetratricopeptide repeat domain 31	Cluster001
ENSG00000115325.13	219	No Class	DOK1	docking protein 1	Cluster001
ENSG00000115365.12	51	No Class	LANCL1	LanC like 1	Cluster001
ENSG00000115548.17	65	No Class	KDM3A	lysine demethylase 3A	Cluster001
ENSG00000115942.9	10	No Class	ORC2	origin recognition complex subunit 2	Cluster001
ENSG00000115947.13	14	No Class	ORC4	origin recognition complex subunit 4	Cluster001
ENSG00000116001.16	61	No Class	TIA1	TIA1 cytotoxic granule associated RNA binding protein	Cluster001
ENSG00000116062.16	71	No Class	MSH6	mutS homolog 6	Cluster001
ENSG00000116127.18	26	No Class	ALMS1	ALMS1 centrosome and basal body associated protein	Cluster001
ENSG00000116138.13	32	No Class	DNAJC16	DnaJ heat shock protein family (Hsp40) member C16	Cluster001
ENSG00000116205.14	39	No Class	TCEANC2	transcription elongation factor A N-terminal and central domain containing 2	Cluster001
ENSG00000116213.16	62	No Class	WRAP73	WD repeat containing. antisense to TP73	Cluster001
ENSG00000116455.14	12	No Class	WDR77	WD repeat domain 77	Cluster001
ENSG00000116685.16	204	No Class	KIAA2013	KIAA2013	Cluster001
ENSG00000116918.15	131	No Class	TSNAX	translin associated factor X	Cluster001
ENSG00000117305.15	111	No Class	HMGCL	3-hydroxy-3-methylglutaryl-CoA lyase	Cluster001
ENSG00000117528.14	55	No Class	ABCD3	ATP binding cassette subfamily D member 3	Cluster001
ENSG00000117625.13	82	No Class	RCOR3	REST corepressor 3	Cluster001
ENSG00000117697.15	37	No Class	NSL1	NSL1 component of MIS12 kinetochore complex	Cluster001
ENSG00000117713.20	42	No Class	ARID1A	AT-rich interaction domain 1A	Cluster001
ENSG00000118046.16	9	No Class	STK11	serine/threonine kinase 11	Cluster001
ENSG00000118482.11	114	No Class	PHF3	PHD finger protein 3	Cluster001
ENSG00000118961.15	27	No Class	LDAH	lipid droplet associated hydrolase	Cluster001
ENSG00000119383.19	22	No Class	PTPA	protein phosphatase 2 phosphatase activator	Cluster001
ENSG00000119392.14	132	No Class	GLE1	GLE1 RNA export mediator	Cluster001
ENSG00000119397.16	16	No Class	CNTRL	centriolin	Cluster001
ENSG00000119596.18	157	No Class	YLPM1	YLP motif containing 1	Cluster001
ENSG00000119638.13	37	No Class	NEK9	NIMA related kinase 9	Cluster001
ENSG00000119669.5	5	No Class	IRF2BPL	interferon regulatory factor 2 binding protein like	Cluster001
ENSG00000119906.13	65	No Class	SLF2	SMC5-SMC6 complex localization factor 2	Cluster001
ENSG00000119927.14	45	No Class	GPAM	glycerol-3-phosphate acyltransferase. mitochondrial	Cluster001
ENSG00000119929.13	18	No Class	CUTC	cutC copper transporter	Cluster001
ENSG00000120008.16	119	No Class	WDR11	WD repeat domain 11	Cluster001
ENSG00000120053.12	3	No Class	GOT1	glutamic-oxaloacetic transaminase 1	Cluster001
ENSG00000120071.14	2	No Class	KANSL1	KAT8 regulatory NSL complex subunit 1	Cluster001
ENSG00000120280.6	9	No Class	CXorf21	chromosome X open reading frame 21	Cluster001
ENSG00000120647.10	10	No Class	CCDC77	coiled-coil domain containing 77	Cluster001
ENSG00000120656.11	38	No Class	TAF12	TATA-box binding protein associated factor 12	Cluster001
ENSG00000120733.14	71	No Class	KDM3B	lysine demethylase 3B	Cluster001
ENSG00000120784.16	22	No Class	ZFP30	ZFP30 zinc finger protein	Cluster001
ENSG00000120802.13	61	No Class	TMPO	thymopoietin	Cluster001
ENSG00000120868.13	7	No Class	APAF1	apoptotic peptidase activating factor 1	Cluster001
ENSG00000120896.13	167	No Class	SORBS3	sorbin and SH3 domain containing 3	Cluster001
ENSG00000120899.18	58	No Class	PTK2B	protein tyrosine kinase 2 beta	Cluster001
ENSG00000120925.16	140	No Class	RNF170	ring finger protein 170	Cluster001
ENSG00000121039.10	2	No Class	RDH10	retinol dehydrogenase 10	Cluster001
ENSG00000121067.19	97	No Class	SPOP	speckle type BTB/POZ protein	Cluster001
ENSG00000121281.13	218	No Class	ADCY7	adenylate cyclase 7	Cluster001
ENSG00000121413.12	5	No Class	ZSCAN18	zinc finger and SCAN domain containing 18	Cluster001
ENSG00000121716.20	49	No Class	PILRB	paired immunoglobin like type 2 receptor beta	Cluster001
ENSG00000121775.18	100	No Class	TMEM39B	transmembrane protein 39B	Cluster001
ENSG00000121851.13	230	No Class	POLR3GL	RNA polymerase III subunit G like	Cluster001
ENSG00000121864.10	174	No Class	ZNF639	zinc finger protein 639	Cluster001
ENSG00000121897.15	58	No Class	LIAS	lipoic acid synthetase	Cluster001
ENSG00000122033.14	231	No Class	MTIF3	mitochondrial translational initiation factor 3	Cluster001
ENSG00000122417.15	20	No Class	ODF2L	outer dense fiber of sperm tails 2 like	Cluster001
ENSG00000122512.16	145	No Class	PMS2	PMS1 homolog 2. mismatch repair system component	Cluster001
ENSG00000122678.17	59	No Class	POLM	DNA polymerase mu	Cluster001
ENSG00000122687.19	341	No Class	MRM2	mitochondrial rRNA methyltransferase 2	Cluster001
ENSG00000123143.12	8	No Class	PKN1	protein kinase N1	Cluster001
ENSG00000123338.13	107	No Class	NCKAP1L	NCK associated protein 1 like	Cluster001
ENSG00000123472.12	11	No Class	ATPAF1	ATP synthase mitochondrial F1 complex assembly factor 1	Cluster001
ENSG00000123595.8	29	No Class	RAB9A	RAB9A. member RAS oncogene family	Cluster001
ENSG00000123643.13	30	No Class	SLC36A1	solute carrier family 36 member 1	Cluster001
ENSG00000124313.16	253	No Class	IQSEC2	IQ motif and Sec7 domain ArfGEF 2	Cluster001
ENSG00000124422.12	152	No Class	USP22	ubiquitin specific peptidase 22	Cluster001
ENSG00000124496.12	95	No Class	TRERF1	transcriptional regulating factor 1	Cluster001
ENSG00000124523.16	18	No Class	SIRT5	sirtuin 5	Cluster001
ENSG00000124549.14	4	No Class	BTN2A3P	butyrophilin subfamily 2 member A3. pseudogene	Cluster001
ENSG00000124587.14	7	No Class	PEX6	peroxisomal biogenesis factor 6	Cluster001
ENSG00000124593.16	185	No Class	AL365205.1	novel protein	Cluster001
ENSG00000124596.17	93	No Class	OARD1	O-acyl-ADP-ribose deacylase 1	Cluster001
ENSG00000124659.7	64	No Class	TBCC	tubulin folding cofactor C	Cluster001
ENSG00000124702.18	82	No Class	KLHDC3	kelch domain containing 3	Cluster001
ENSG00000125124.12	9	No Class	BBS2	Bardet-Biedl syndrome 2	Cluster001
ENSG00000125352.6	15	No Class	RNF113A	ring finger protein 113A	Cluster001
ENSG00000125447.17	176	No Class	GGA3	golgi associated. gamma adaptin ear containing. ARF binding protein 3	Cluster001
ENSG00000125449.7	2	No Class	ARMC7	armadillo repeat containing 7	Cluster001
ENSG00000125450.11	154	No Class	NUP85	nucleoporin 85	Cluster001
ENSG00000125826.20	124	No Class	RBCK1	RANBP2-type and C3HC4-type zinc finger containing 1	Cluster001
ENSG00000125843.11	48	No Class	AP5S1	adaptor related protein complex 5 subunit sigma 1	Cluster001
ENSG00000125846.15	21	No Class	ZNF133	zinc finger protein 133	Cluster001
ENSG00000125871.14	79	No Class	MGME1	mitochondrial genome maintenance exonuclease 1	Cluster001
ENSG00000126107.15	149	No Class	HECTD3	HECT domain E3 ubiquitin protein ligase 3	Cluster001
ENSG00000126216.15	173	No Class	TUBGCP3	tubulin gamma complex associated protein 3	Cluster001
ENSG00000126456.16	151	No Class	IRF3	interferon regulatory factor 3	Cluster001
ENSG00000126458.4	31	No Class	RRAS	RAS related	Cluster001
ENSG00000126464.14	43	No Class	PRR12	proline rich 12	Cluster001
ENSG00000126561.16	95	No Class	STAT5A	signal transducer and activator of transcription 5A	Cluster001
ENSG00000126858.18	232	No Class	RHOT1	ras homolog family member T1	Cluster001
ENSG00000126882.13	219	No Class	FAM78A	family with sequence similarity 78 member A	Cluster001
ENSG00000126883.17	2	No Class	NUP214	nucleoporin 214	Cluster001
ENSG00000127084.19	66	No Class	FGD3	FYVE. RhoGEF and PH domain containing 3	Cluster001
ENSG00000127125.9	97	No Class	PPCS	phosphopantothenoylcysteine synthetase	Cluster001
ENSG00000127419.17	52	No Class	TMEM175	transmembrane protein 175	Cluster001
ENSG00000127580.17	90	No Class	WDR24	WD repeat domain 24	Cluster001
ENSG00000127720.8	22	No Class	METTL25	methyltransferase like 25	Cluster001
ENSG00000127980.16	183	No Class	PEX1	peroxisomal biogenesis factor 1	Cluster001
ENSG00000127995.17	135	No Class	CASD1	CAS1 domain containing 1	Cluster001
ENSG00000128203.7	1	No Class	ASPHD2	aspartate beta-hydroxylase domain containing 2	Cluster001
ENSG00000128250.5	1	No Class	RFPL1	ret finger protein like 1	Cluster001
ENSG00000128309.16	87	No Class	MPST	mercaptopyruvate sulfurtransferase	Cluster001
ENSG00000128311.14	45	No Class	TST	thiosulfate sulfurtransferase	Cluster001
ENSG00000128694.12	27	No Class	OSGEPL1	O-sialoglycoprotein endopeptidase like 1	Cluster001
ENSG00000128915.12	39	No Class	ICE2	interactor of little elongation complex ELL subunit 2	Cluster001
ENSG00000128923.11	14	No Class	MINDY2	MINDY lysine 48 deubiquitinase 2	Cluster001
ENSG00000128928.10	101	No Class	IVD	isovaleryl-CoA dehydrogenase	Cluster001
ENSG00000128951.14	32	No Class	DUT	deoxyuridine triphosphatase	Cluster001
ENSG00000129071.9	62	No Class	MBD4	methyl-CpG binding domain 4. DNA glycosylase	Cluster001
ENSG00000129219.14	26	No Class	PLD2	phospholipase D2	Cluster001
ENSG00000129484.13	70	No Class	PARP2	poly(ADP-ribose) polymerase 2	Cluster001
ENSG00000129518.9	49	No Class	EAPP	E2F associated phosphoprotein	Cluster001
ENSG00000129534.14	5	No Class	MIS18BP1	MIS18 binding protein 1	Cluster001
ENSG00000129657.16	39	No Class	SEC14L1	SEC14 like lipid binding 1	Cluster001
ENSG00000129691.16	44	No Class	ASH2L	ASH2 like. histone lysine methyltransferase complex subunit	Cluster001
ENSG00000130227.17	266	No Class	XPO7	exportin 7	Cluster001
ENSG00000130244.12	85	No Class	FAM98C	family with sequence similarity 98 member C	Cluster001
ENSG00000130299.17	59	No Class	GTPBP3	GTP binding protein 3. mitochondrial	Cluster001
ENSG00000130511.16	64	No Class	SSBP4	single stranded DNA binding protein 4	Cluster001
ENSG00000130517.14	238	No Class	PGPEP1	pyroglutamyl-peptidase I	Cluster001
ENSG00000130529.16	20	No Class	TRPM4	transient receptor potential cation channel subfamily M member 4	Cluster001
ENSG00000130560.9	113	No Class	UBAC1	UBA domain containing 1	Cluster001
ENSG00000130684.14	114	No Class	ZNF337	zinc finger protein 337	Cluster001
ENSG00000130770.18	16	No Class	ATP5IF1	ATP synthase inhibitory factor subunit 1	Cluster001
ENSG00000130939.20	84	No Class	UBE4B	ubiquitination factor E4B	Cluster001
ENSG00000131149.19	3	No Class	GSE1	Gse1 coiled-coil protein	Cluster001
ENSG00000131373.15	75	No Class	HACL1	2-hydroxyacyl-CoA lyase 1	Cluster001
ENSG00000131653.13	33	No Class	TRAF7	TNF receptor associated factor 7	Cluster001
ENSG00000131725.14	104	No Class	WDR44	WD repeat domain 44	Cluster001
ENSG00000131779.11	180	No Class	PEX11B	peroxisomal biogenesis factor 11 beta	Cluster001
ENSG00000131788.16	337	No Class	PIAS3	protein inhibitor of activated STAT 3	Cluster001
ENSG00000131944.10	14	No Class	FAAP24	FA core complex associated protein 24	Cluster001
ENSG00000132024.17	23	No Class	CC2D1A	coiled-coil and C2 domain containing 1A	Cluster001
ENSG00000132357.14	51	No Class	CARD6	caspase recruitment domain family member 6	Cluster001
ENSG00000132383.12	260	No Class	RPA1	replication protein A1	Cluster001
ENSG00000132405.19	128	No Class	TBC1D14	TBC1 domain family member 14	Cluster001
ENSG00000132600.16	85	No Class	PRMT7	protein arginine methyltransferase 7	Cluster001
ENSG00000132613.15	1	No Class	MTSS2	MTSS I-BAR domain containing 2	Cluster001
ENSG00000132635.17	42	No Class	PCED1A	PC-esterase domain containing 1A	Cluster001
ENSG00000132646.11	14	No Class	PCNA	proliferating cell nuclear antigen	Cluster001
ENSG00000132670.20	124	No Class	PTPRA	protein tyrosine phosphatase receptor type A	Cluster001
ENSG00000132825.7	227	No Class	PPP1R3D	protein phosphatase 1 regulatory subunit 3D	Cluster001
ENSG00000133059.17	13	No Class	DSTYK	dual serine/threonine and tyrosine protein kinase	Cluster001
ENSG00000133111.3	49	No Class	RFXAP	regulatory factor X associated protein	Cluster001
ENSG00000133119.13	10	No Class	RFC3	replication factor C subunit 3	Cluster001
ENSG00000133243.10	180	No Class	BTBD2	BTB domain containing 2	Cluster001
ENSG00000133247.14	140	No Class	KMT5C	lysine methyltransferase 5C	Cluster001
ENSG00000133302.13	24	No Class	SLF1	SMC5-SMC6 complex localization factor 1	Cluster001
ENSG00000133302.13.1	18	No Class	SLF1	SMC5-SMC6 complex localization factor 1	Cluster001
ENSG00000133624.13	2	No Class	ZNF767P	zinc finger family member 767. pseudogene	Cluster001
ENSG00000133739.16	117	No Class	LRRCC1	leucine rich repeat and coiled-coil centrosomal protein 1	Cluster001
ENSG00000133789.15	41	No Class	SWAP70	switching B cell complex subunit SWAP70	Cluster001
ENSG00000133895.15	112	No Class	MEN1	menin 1	Cluster001
ENSG00000134255.14	24	No Class	CEPT1	choline/ethanolamine phosphotransferase 1	Cluster001
ENSG00000134262.13	13	No Class	AP4B1	adaptor related protein complex 4 subunit beta 1	Cluster001
ENSG00000134440.12	40	No Class	NARS1	asparaginyl-tRNA synthetase 1	Cluster001
ENSG00000134690.11	122	No Class	CDCA8	cell division cycle associated 8	Cluster001
ENSG00000134899.21	67	No Class	ERCC5	ERCC excision repair 5. endonuclease	Cluster001
ENSG00000135093.13	44	No Class	USP30	ubiquitin specific peptidase 30	Cluster001
ENSG00000135148.12	171	No Class	TRAFD1	TRAF-type zinc finger domain containing 1	Cluster001
ENSG00000135365.15	123	No Class	PHF21A	PHD finger protein 21A	Cluster001
ENSG00000135457.10	191	No Class	TFCP2	transcription factor CP2	Cluster001
ENSG00000135605.13	103	No Class	TEC	tec protein tyrosine kinase	Cluster001
ENSG00000135637.14	37	No Class	CCDC142	coiled-coil domain containing 142	Cluster001
ENSG00000135686.13	162	No Class	KLHL36	kelch like family member 36	Cluster001
ENSG00000135709.12	78	No Class	KIAA0513	KIAA0513	Cluster001
ENSG00000135775.14	110	No Class	COG2	component of oligomeric golgi complex 2	Cluster001
ENSG00000135828.11	157	No Class	RNASEL	ribonuclease L	Cluster001
ENSG00000136003.15	70	No Class	ISCU	iron-sulfur cluster assembly enzyme	Cluster001
ENSG00000136122.17	2	No Class	BORA	BORA aurora kinase A activator	Cluster001
ENSG00000136144.12	180	No Class	RCBTB1	RCC1 and BTB domain containing protein 1	Cluster001
ENSG00000136144.12.1	180	No Class	RCBTB1	RCC1 and BTB domain containing protein 1	Cluster001
ENSG00000136169.16	15	No Class	SETDB2	SET domain bifurcated histone lysine methyltransferase 2	Cluster001
ENSG00000136213.10	1	No Class	CHST12	carbohydrate sulfotransferase 12	Cluster001
ENSG00000136280.16	72	No Class	CCM2	CCM2 scaffold protein	Cluster001
ENSG00000136319.12	3	No Class	TTC5	tetratricopeptide repeat domain 5	Cluster001
ENSG00000136444.10	70	No Class	RSAD1	radical S-adenosyl methionine domain containing 1	Cluster001
ENSG00000136457.10	13	No Class	CHAD	chondroadherin	Cluster001
ENSG00000136631.15	163	No Class	VPS45	vacuolar protein sorting 45 homolog	Cluster001
ENSG00000136715.18	20	No Class	SAP130	Sin3A associated protein 130	Cluster001
ENSG00000136824.19	120	No Class	SMC2	structural maintenance of chromosomes 2	Cluster001
ENSG00000136878.13	211	No Class	USP20	ubiquitin specific peptidase 20	Cluster001
ENSG00000137040.10	66	No Class	RANBP6	RAN binding protein 6	Cluster001
ENSG00000137040.10.1	66	No Class	RANBP6	RAN binding protein 6	Cluster001
ENSG00000137145.20	4	No Class	DENND4C	DENN domain containing 4C	Cluster001
ENSG00000137161.17	97	No Class	CNPY3	canopy FGF signaling regulator 3	Cluster001
ENSG00000137171.15	67	No Class	KLC4	kinesin light chain 4	Cluster001
ENSG00000137414.6	16	No Class	FAM8A1	family with sequence similarity 8 member A1	Cluster001
ENSG00000137486.17	43	No Class	ARRB1	arrestin beta 1	Cluster001
ENSG00000137494.14	14	No Class	ANKRD42	ankyrin repeat domain 42	Cluster001
ENSG00000137831.15	28	No Class	UACA	uveal autoantigen with coiled-coil domains and ankyrin repeats	Cluster001
ENSG00000137871.20	186	No Class	ZNF280D	zinc finger protein 280D	Cluster001
ENSG00000137992.14	83	No Class	DBT	dihydrolipoamide branched chain transacylase E2	Cluster001
ENSG00000138002.15	23	No Class	IFT172	intraflagellar transport 172	Cluster001
ENSG00000138036.18	123	No Class	DYNC2LI1	dynein cytoplasmic 2 light intermediate chain 1	Cluster001
ENSG00000138078.15	2	No Class	PREPL	prolyl endopeptidase like	Cluster001
ENSG00000138111.14	58	No Class	MFSD13A	major facilitator superfamily domain containing 13A	Cluster001
ENSG00000138160.6	168	No Class	KIF11	kinesin family member 11	Cluster001
ENSG00000138182.14	72	No Class	KIF20B	kinesin family member 20B	Cluster001
ENSG00000138375.13	144	No Class	SMARCAL1	SWI/SNF related. matrix associated. actin dependent regulator of chromatin. subfamily a like 1	Cluster001
ENSG00000138463.9	35	No Class	SLC49A4	solute carrier family 49 member 4	Cluster001
ENSG00000138468.16	81	No Class	SENP7	SUMO specific peptidase 7	Cluster001
ENSG00000138604.10	64	No Class	GLCE	glucuronic acid epimerase	Cluster001
ENSG00000138617.15	5	No Class	PARP16	poly(ADP-ribose) polymerase family member 16	Cluster001
ENSG00000138641.18	44	No Class	HERC3	HECT and RLD domain containing E3 ubiquitin protein ligase 3	Cluster001
ENSG00000138658.15	41	No Class	ZGRF1	zinc finger GRF-type containing 1	Cluster001
ENSG00000138688.15	92	No Class	KIAA1109	KIAA1109	Cluster001
ENSG00000138756.17	89	No Class	BMP2K	BMP2 inducible kinase	Cluster001
ENSG00000138767.13	41	No Class	CNOT6L	CCR4-NOT transcription complex subunit 6 like	Cluster001
ENSG00000138780.15	39	No Class	GSTCD	glutathione S-transferase C-terminal domain containing	Cluster001
ENSG00000138794.10	157	No Class	CASP6	caspase 6	Cluster001
ENSG00000138964.17	116	No Class	PARVG	parvin gamma	Cluster001
ENSG00000139160.13	2	No Class	ETFBKMT	electron transfer flavoprotein subunit beta lysine methyltransferase	Cluster001
ENSG00000139173.10	3	No Class	TMEM117	transmembrane protein 117	Cluster001
ENSG00000139193.3	36	No Class	CD27	CD27 molecule	Cluster001
ENSG00000139350.11	79	No Class	NEDD1	NEDD1 gamma-tubulin ring complex targeting factor	Cluster001
ENSG00000139405.16	111	No Class	RITA1	RBPJ interacting and tubulin associated 1	Cluster001
ENSG00000139436.21	218	No Class	GIT2	GIT ArfGAP 2	Cluster001
ENSG00000139437.18	178	No Class	TCHP	trichoplein keratin filament binding	Cluster001
ENSG00000139531.13	170	No Class	SUOX	sulfite oxidase	Cluster001
ENSG00000139546.11	150	No Class	TARBP2	TARBP2 subunit of RISC loading complex	Cluster001
ENSG00000139651.11	86	No Class	ZNF740	zinc finger protein 740	Cluster001
ENSG00000139675.12	1	No Class	HNRNPA1L2	heterogeneous nuclear ribonucleoprotein A1 like 2	Cluster001
ENSG00000139719.11	36	No Class	VPS33A	VPS33A core subunit of CORVET and HOPS complexes	Cluster001
ENSG00000139793.18	21	No Class	MBNL2	muscleblind like splicing regulator 2	Cluster001
ENSG00000139990.18	234	No Class	DCAF5	DDB1 and CUL4 associated factor 5	Cluster001
ENSG00000140025.16	9	No Class	EFCAB11	EF-hand calcium binding domain 11	Cluster001
ENSG00000140299.12	3	No Class	BNIP2	BCL2 interacting protein 2	Cluster001
ENSG00000140350.15	82	No Class	ANP32A	acidic nuclear phosphoprotein 32 family member A	Cluster001
ENSG00000140368.13	3	No Class	PSTPIP1	proline-serine-threonine phosphatase interacting protein 1	Cluster001
ENSG00000140382.15	43	No Class	HMG20A	high mobility group 20A	Cluster001
ENSG00000140396.13	185	No Class	NCOA2	nuclear receptor coactivator 2	Cluster001
ENSG00000140463.14	128	No Class	BBS4	Bardet-Biedl syndrome 4	Cluster001
ENSG00000140474.14	134	No Class	AC091230.1	unc-51 like kinase 3	Cluster001
ENSG00000140497.16	224	No Class	SCAMP2	secretory carrier membrane protein 2	Cluster001
ENSG00000140548.10	101	No Class	ZNF710	zinc finger protein 710	Cluster001
ENSG00000140718.21	51	No Class	FTO	FTO alpha-ketoglutarate dependent dioxygenase	Cluster001
ENSG00000140854.13	50	No Class	KATNB1	katanin regulatory subunit B1	Cluster001
ENSG00000140876.11	61	No Class	NUDT7	nudix hydrolase 7	Cluster001
ENSG00000141013.17	10	No Class	GAS8	growth arrest specific 8	Cluster001
ENSG00000141084.11	11	No Class	RANBP10	RAN binding protein 10	Cluster001
ENSG00000141084.11.1	23	No Class	RANBP10	RAN binding protein 10	Cluster001
ENSG00000141295.14	37	No Class	SCRN2	secernin 2	Cluster001
ENSG00000141456.16	32	No Class	PELP1	proline. glutamate and leucine rich protein 1	Cluster001
ENSG00000141499.16	6	No Class	WRAP53	WD repeat containing antisense to TP53	Cluster001
ENSG00000141503.17	162	No Class	MINK1	misshapen like kinase 1	Cluster001
ENSG00000141569.12	38	No Class	TRIM65	tripartite motif containing 65	Cluster001
ENSG00000141582.15	5	No Class	CBX4	chromobox 4	Cluster001
ENSG00000141699.11	73	No Class	RETREG3	reticulophagy regulator family member 3	Cluster001
ENSG00000141873.11	34	No Class	SLC39A3	solute carrier family 39 member 3	Cluster001
ENSG00000142065.14	178	No Class	ZFP14	ZFP14 zinc finger protein	Cluster001
ENSG00000142082.15	177	No Class	SIRT3	sirtuin 3	Cluster001
ENSG00000142327.13	48	No Class	RNPEPL1	arginyl aminopeptidase like 1	Cluster001
ENSG00000142347.19	180	No Class	MYO1F	myosin IF	Cluster001
ENSG00000142459.8	28	No Class	EVI5L	ecotropic viral integration site 5 like	Cluster001
ENSG00000142599.19	98	No Class	RERE	arginine-glutamic acid dipeptide repeats	Cluster001
ENSG00000143149.12	7	No Class	ALDH9A1	aldehyde dehydrogenase 9 family member A1	Cluster001
ENSG00000143224.18	167	No Class	PPOX	protoporphyrinogen oxidase	Cluster001
ENSG00000143258.16	138	No Class	USP21	ubiquitin specific peptidase 21	Cluster001
ENSG00000143303.12	37	No Class	RRNAD1	ribosomal RNA adenine dimethylase domain containing 1	Cluster001
ENSG00000143315.8	76	No Class	PIGM	phosphatidylinositol glycan anchor biosynthesis class M	Cluster001
ENSG00000143363.17	238	No Class	PRUNE1	prune exopolyphosphatase 1	Cluster001
ENSG00000143374.17	52	No Class	TARS2	threonyl-tRNA synthetase 2. mitochondrial	Cluster001
ENSG00000143376.14	126	No Class	SNX27	sorting nexin 27	Cluster001
ENSG00000143434.15	4	No Class	SEMA6C	semaphorin 6C	Cluster001
ENSG00000143457.11	17	No Class	GOLPH3L	golgi phosphoprotein 3 like	Cluster001
ENSG00000143578.16	79	No Class	CREB3L4	cAMP responsive element binding protein 3 like 4	Cluster001
ENSG00000143740.14	66	No Class	SNAP47	synaptosome associated protein 47	Cluster001
ENSG00000143799.13	32	No Class	PARP1	poly(ADP-ribose) polymerase 1	Cluster001
ENSG00000143971.9	96	No Class	ETAA1	ETAA1 activator of ATR kinase	Cluster001
ENSG00000144026.12	83	No Class	ZNF514	zinc finger protein 514	Cluster001
ENSG00000144182.17	171	No Class	LIPT1	lipoyltransferase 1	Cluster001
ENSG00000144228.9	183	No Class	SPOPL	speckle type BTB/POZ protein like	Cluster001
ENSG00000144306.15	57	No Class	SCRN3	secernin 3	Cluster001
ENSG00000144320.14	44	No Class	LNPK	lunapark. ER junction formation factor	Cluster001
ENSG00000144357.17	37	No Class	UBR3	ubiquitin protein ligase E3 component n-recognin 3	Cluster001
ENSG00000144401.14	39	No Class	METTL21A	methyltransferase like 21A	Cluster001
ENSG00000144451.19	39	No Class	SPAG16	sperm associated antigen 16	Cluster001
ENSG00000144504.15	113	No Class	ANKMY1	ankyrin repeat and MYND domain containing 1	Cluster001
ENSG00000144524.17	207	No Class	COPS7B	COP9 signalosome subunit 7B	Cluster001
ENSG00000144567.11	267	No Class	RETREG2	reticulophagy regulator family member 2	Cluster001
ENSG00000144579.7	11	No Class	CTDSP1	CTD small phosphatase 1	Cluster001
ENSG00000144647.6	93	No Class	POMGNT2	protein O-linked mannose N-acetylglucosaminyltransferase 2 (beta 1.4-)	Cluster001
ENSG00000144659.13	3	No Class	SLC25A38	solute carrier family 25 member 38	Cluster001
ENSG00000144791.10	104	No Class	LIMD1	LIM domains containing 1	Cluster001
ENSG00000144909.8	99	No Class	OSBPL11	oxysterol binding protein like 11	Cluster001
ENSG00000145016.16	76	No Class	RUBCN	rubicon autophagy regulator	Cluster001
ENSG00000145241.11	69	No Class	CENPC	centromere protein C	Cluster001
ENSG00000145246.14	7	No Class	ATP10D	ATPase phospholipid transporting 10D (putative)	Cluster001
ENSG00000145332.14	23	No Class	KLHL8	kelch like family member 8	Cluster001
ENSG00000145391.13	8	No Class	SETD7	SET domain containing 7. histone lysine methyltransferase	Cluster001
ENSG00000145431.11	122	No Class	PDGFC	platelet derived growth factor C	Cluster001
ENSG00000145604.16	104	No Class	SKP2	S-phase kinase associated protein 2	Cluster001
ENSG00000145916.19	101	No Class	RMND5B	required for meiotic nuclear division 5 homolog B	Cluster001
ENSG00000145996.11	51	No Class	CDKAL1	CDK5 regulatory subunit associated protein 1 like 1	Cluster001
ENSG00000146067.16	81	No Class	FAM193B	family with sequence similarity 193 member B	Cluster001
ENSG00000146083.12	120	No Class	RNF44	ring finger protein 44	Cluster001
ENSG00000146094.14	119	No Class	DOK3	docking protein 3	Cluster001
ENSG00000146556.14	114	No Class	WASH2P	WASP family homolog 2. pseudogene	Cluster001
ENSG00000146828.18	72	No Class	SLC12A9	solute carrier family 12 member 9	Cluster001
ENSG00000146830.10	22	No Class	GIGYF1	GRB10 interacting GYF protein 1	Cluster001
ENSG00000146830.10.1	23	No Class	GIGYF1	GRB10 interacting GYF protein 1	Cluster001
ENSG00000147130.14	239	No Class	ZMYM3	zinc finger MYM-type containing 3	Cluster001
ENSG00000147133.15	17	No Class	TAF1	TATA-box binding protein associated factor 1	Cluster001
ENSG00000147251.15	14	No Class	DOCK11	dedicator of cytokinesis 11	Cluster001
ENSG00000147912.13	24	No Class	FBXO10	F-box protein 10	Cluster001
ENSG00000148019.13	89	No Class	CEP78	centrosomal protein 78	Cluster001
ENSG00000148153.14	99	No Class	INIP	INTS3 and NABP interacting protein	Cluster001
ENSG00000148158.17	81	No Class	SNX30	sorting nexin family member 30	Cluster001
ENSG00000148337.21	85	No Class	CIZ1	CDKN1A interacting zinc finger protein 1	Cluster001
ENSG00000148400.12	60	No Class	NOTCH1	notch receptor 1	Cluster001
ENSG00000148444.16	60	No Class	COMMD3	COMM domain containing 3	Cluster001
ENSG00000148730.7	255	No Class	EIF4EBP2	eukaryotic translation initiation factor 4E binding protein 2	Cluster001
ENSG00000148814.18	36	No Class	LRRC27	leucine rich repeat containing 27	Cluster001
ENSG00000148842.18	90	No Class	CNNM2	cyclin and CBS domain divalent metal cation transport mediator 2	Cluster001
ENSG00000149089.13	1	No Class	APIP	APAF1 interacting protein	Cluster001
ENSG00000149311.18	120	No Class	ATM	ATM serine/threonine kinase	Cluster001
ENSG00000149503.13	101	No Class	INCENP	inner centromere protein	Cluster001
ENSG00000149548.15	30	No Class	CCDC15	coiled-coil domain containing 15	Cluster001
ENSG00000149657.20	271	No Class	LSM14B	LSM family member 14B	Cluster001
ENSG00000149929.16	18	No Class	HIRIP3	HIRA interacting protein 3	Cluster001
ENSG00000150433.9	107	No Class	TMEM218	transmembrane protein 218	Cluster001
ENSG00000150455.13	118	No Class	TIRAP	TIR domain containing adaptor protein	Cluster001
ENSG00000150527.17	165	No Class	MIA2	MIA SH3 domain ER export factor 2	Cluster001
ENSG00000150593.18	36	No Class	PDCD4	programmed cell death 4	Cluster001
ENSG00000150961.15	4	No Class	SEC24D	SEC24 homolog D. COPII coat complex component	Cluster001
ENSG00000151332.19	9	No Class	MBIP	MAP3K12 binding inhibitory protein 1	Cluster001
ENSG00000151445.16	179	No Class	VIPAS39	VPS33B interacting protein. apical-basolateral polarity regulator. spe-39 homolog	Cluster001
ENSG00000151498.11	2	No Class	ACAD8	acyl-CoA dehydrogenase family member 8	Cluster001
ENSG00000151500.15	39	No Class	THYN1	thymocyte nuclear protein 1	Cluster001
ENSG00000151502.11	326	No Class	VPS26B	VPS26. retromer complex component B	Cluster001
ENSG00000151503.12	21	No Class	NCAPD3	non-SMC condensin II complex subunit D3	Cluster001
ENSG00000151923.17	101	No Class	TIAL1	TIA1 cytotoxic granule associated RNA binding protein like 1	Cluster001
ENSG00000152133.14	26	No Class	GPATCH11	G-patch domain containing 11	Cluster001
ENSG00000152147.11	14	No Class	GEMIN6	gem nuclear organelle associated protein 6	Cluster001
ENSG00000152409.9	13	No Class	JMY	junction mediating and regulatory protein. p53 cofactor	Cluster001
ENSG00000152455.16	17	No Class	SUV39H2	suppressor of variegation 3-9 homolog 2	Cluster001
ENSG00000152457.18	176	No Class	DCLRE1C	DNA cross-link repair 1C	Cluster001
ENSG00000152518.8	66	No Class	ZFP36L2	ZFP36 ring finger protein like 2	Cluster001
ENSG00000152518.8.1	57	No Class	ZFP36L2	ZFP36 ring finger protein like 2	Cluster001
ENSG00000152620.13	211	No Class	NADK2	NAD kinase 2. mitochondrial	Cluster001
ENSG00000153029.14	6	No Class	MR1	major histocompatibility complex. class I-related	Cluster001
ENSG00000153140.8	6	No Class	CETN3	centrin 3	Cluster001
ENSG00000153179.13	98	No Class	RASSF3	Ras association domain family member 3	Cluster001
ENSG00000153214.11	1	No Class	TMEM87B	transmembrane protein 87B	Cluster001
ENSG00000153406.13	171	No Class	NMRAL1	NmrA like redox sensor 1	Cluster001
ENSG00000153786.12	253	No Class	ZDHHC7	zinc finger DHHC-type containing 7	Cluster001
ENSG00000153832.12	14	No Class	FBXO36	F-box protein 36	Cluster001
ENSG00000154059.11	33	No Class	IMPACT	impact RWD domain protein	Cluster001
ENSG00000154305.18	127	No Class	MIA3	MIA SH3 domain ER export factor 3	Cluster001
ENSG00000154429.11	213	No Class	CCSAP	centriole. cilia and spindle associated protein	Cluster001
ENSG00000154767.14	29	No Class	XPC	XPC complex subunit. DNA damage recognition and repair factor	Cluster001
ENSG00000154822.18	81	No Class	PLCL2	phospholipase C like 2	Cluster001
ENSG00000154957.14	159	No Class	ZNF18	zinc finger protein 18	Cluster001
ENSG00000155099.8	72	No Class	PIP4P2	phosphatidylinositol-4.5-bisphosphate 4-phosphatase 2	Cluster001
ENSG00000155111.15	18	No Class	CDK19	cyclin dependent kinase 19	Cluster001
ENSG00000155508.13	23	No Class	CNOT8	CCR4-NOT transcription complex subunit 8	Cluster001
ENSG00000155827.12	85	No Class	RNF20	ring finger protein 20	Cluster001
ENSG00000155906.19	9	No Class	RMND1	required for meiotic nuclear division 1 homolog	Cluster001
ENSG00000156030.13	12	No Class	ELMSAN1	ELM2 and Myb/SANT domain containing 1	Cluster001
ENSG00000156136.10	149	No Class	DCK	deoxycytidine kinase	Cluster001
ENSG00000156172.6	5	No Class	C8orf37	chromosome 8 open reading frame 37	Cluster001
ENSG00000156253.7	11	No Class	RWDD2B	RWD domain containing 2B	Cluster001
ENSG00000156521.14	28	No Class	TYSND1	trypsin domain containing 1	Cluster001
ENSG00000156675.16	21	No Class	RAB11FIP1	RAB11 family interacting protein 1	Cluster001
ENSG00000156735.11	73	No Class	BAG4	BCL2 associated athanogene 4	Cluster001
ENSG00000156735.11.1	73	No Class	BAG4	BCL2 associated athanogene 4	Cluster001
ENSG00000156787.17	9	No Class	TBC1D31	TBC1 domain family member 31	Cluster001
ENSG00000156802.13	28	No Class	ATAD2	ATPase family AAA domain containing 2	Cluster001
ENSG00000156853.13	135	No Class	ZNF689	zinc finger protein 689	Cluster001
ENSG00000156873.16	217	No Class	PHKG2	phosphorylase kinase catalytic subunit gamma 2	Cluster001
ENSG00000156876.10	136	No Class	SASS6	SAS-6 centriolar assembly protein	Cluster001
ENSG00000156958.15	65	No Class	GALK2	galactokinase 2	Cluster001
ENSG00000157184.7	159	No Class	CPT2	carnitine palmitoyltransferase 2	Cluster001
ENSG00000157353.17	112	No Class	FCSK	fucose kinase	Cluster001
ENSG00000157426.14	297	No Class	AASDH	aminoadipate-semialdehyde dehydrogenase	Cluster001
ENSG00000157873.17	64	No Class	TNFRSF14	TNF receptor superfamily member 14	Cluster001
ENSG00000157954.15	115	No Class	WIPI2	WD repeat domain. phosphoinositide interacting 2	Cluster001
ENSG00000158006.14	62	No Class	PAFAH2	platelet activating factor acetylhydrolase 2	Cluster001
ENSG00000158092.7	23	No Class	NCK1	NCK adaptor protein 1	Cluster001
ENSG00000158109.15	115	No Class	TPRG1L	tumor protein p63 regulated 1 like	Cluster001
ENSG00000158156.8	1	No Class	XKR8	XK related 8	Cluster001
ENSG00000158290.17	53	No Class	CUL4B	cullin 4B	Cluster001
ENSG00000158773.14	152	No Class	USF1	upstream transcription factor 1	Cluster001
ENSG00000158793.14	257	No Class	NIT1	nitrilase 1	Cluster001
ENSG00000158828.8	37	No Class	PINK1	PTEN induced kinase 1	Cluster001
ENSG00000158864.12	35	No Class	NDUFS2	NADH:ubiquinone oxidoreductase core subunit S2	Cluster001
ENSG00000158882.15	1	No Class	TOMM40L	translocase of outer mitochondrial membrane 40 like	Cluster001
ENSG00000159079.19	40	No Class	CFAP298	cilia and flagella associated protein 298	Cluster001
ENSG00000159214.13	39	No Class	CCDC24	coiled-coil domain containing 24	Cluster001
ENSG00000159761.15	4	No Class	C16orf86	chromosome 16 open reading frame 86	Cluster001
ENSG00000159788.19	248	No Class	RGS12	regulator of G protein signaling 12	Cluster001
ENSG00000159792.10	112	No Class	PSKH1	protein serine kinase H1	Cluster001
ENSG00000160007.19	238	No Class	ARHGAP35	Rho GTPase activating protein 35	Cluster001
ENSG00000160051.11	57	No Class	IQCC	IQ motif containing C	Cluster001
ENSG00000160094.15	110	No Class	ZNF362	zinc finger protein 362	Cluster001
ENSG00000160233.8	8	No Class	LRRC3	leucine rich repeat containing 3	Cluster001
ENSG00000160299.17	26	No Class	PCNT	pericentrin	Cluster001
ENSG00000160310.18	282	No Class	PRMT2	protein arginine methyltransferase 2	Cluster001
ENSG00000160404.18	35	No Class	TOR2A	torsin family 2 member A	Cluster001
ENSG00000160445.11	77	No Class	ZER1	zyg-11 related cell cycle regulator	Cluster001
ENSG00000160446.19	91	No Class	ZDHHC12	zinc finger DHHC-type containing 12	Cluster001
ENSG00000160685.13	47	No Class	ZBTB7B	zinc finger and BTB domain containing 7B	Cluster001
ENSG00000160703.16	143	No Class	NLRX1	NLR family member X1	Cluster001
ENSG00000160949.17	66	No Class	TONSL	tonsoku like. DNA repair protein	Cluster001
ENSG00000160993.4	3	No Class	ALKBH4	alkB homolog 4. lysine demethylase	Cluster001
ENSG00000161048.11	120	No Class	NAPEPLD	N-acyl phosphatidylethanolamine phospholipase D	Cluster001
ENSG00000161277.11	108	No Class	THAP8	THAP domain containing 8	Cluster001
ENSG00000161653.11	3	No Class	NAGS	N-acetylglutamate synthase	Cluster001
ENSG00000161664.7	3	No Class	ASB16	ankyrin repeat and SOCS box containing 16	Cluster001
ENSG00000162032.16	139	No Class	SPSB3	splA/ryanodine receptor domain and SOCS box containing 3	Cluster001
ENSG00000162065.14	133	No Class	TBC1D24	TBC1 domain family member 24	Cluster001
ENSG00000162073.14	112	No Class	PAQR4	progestin and adipoQ receptor family member 4	Cluster001
ENSG00000162139.10	27	No Class	NEU3	neuraminidase 3	Cluster001
ENSG00000162148.11	2	No Class	PPP1R32	protein phosphatase 1 regulatory subunit 32	Cluster001
ENSG00000162194.12	2	No Class	LBHD1	LBH domain containing 1	Cluster001
ENSG00000162222.14	9	No Class	TTC9C	tetratricopeptide repeat domain 9C	Cluster001
ENSG00000162227.8	81	No Class	TAF6L	TATA-box binding protein associated factor 6 like	Cluster001
ENSG00000162300.13	19	No Class	ZFPL1	zinc finger protein like 1	Cluster001
ENSG00000162378.13	157	No Class	ZYG11B	zyg-11 family member B. cell cycle regulator	Cluster001
ENSG00000162441.12	3	No Class	LZIC	leucine zipper and CTNNBIP1 domain containing	Cluster001
ENSG00000162585.17	59	No Class	FAAP20	FA core complex associated protein 20	Cluster001
ENSG00000162639.16	46	No Class	HENMT1	HEN methyltransferase 1	Cluster001
ENSG00000162688.17	50	No Class	AGL	amylo-alpha-1. 6-glucosidase. 4-alpha-glucanotransferase	Cluster001
ENSG00000162694.14	2	No Class	EXTL2	exostosin like glycosyltransferase 2	Cluster001
ENSG00000162819.12	10	No Class	BROX	BRO1 domain and CAAX motif containing	Cluster001
ENSG00000162910.19	16	No Class	MRPL55	mitochondrial ribosomal protein L55	Cluster001
ENSG00000163013.11	95	No Class	FBXO41	F-box protein 41	Cluster001
ENSG00000163029.16	9	No Class	SMC6	structural maintenance of chromosomes 6	Cluster001
ENSG00000163050.17	142	No Class	COQ8A	coenzyme Q8A	Cluster001
ENSG00000163104.17	116	No Class	SMARCAD1	SWI/SNF-related. matrix-associated actin-dependent regulator of chromatin. subfamily a. containing DEAD/H box 1	Cluster001
ENSG00000163125.15	77	No Class	RPRD2	regulation of nuclear pre-mRNA domain containing 2	Cluster001
ENSG00000163214.21	122	No Class	DHX57	DExH-box helicase 57	Cluster001
ENSG00000163348.4	90	No Class	PYGO2	pygopus family PHD finger 2	Cluster001
ENSG00000163393.13	8	No Class	SLC22A15	solute carrier family 22 member 15	Cluster001
ENSG00000163472.19	127	No Class	TMEM79	transmembrane protein 79	Cluster001
ENSG00000163482.12	34	No Class	STK36	serine/threonine kinase 36	Cluster001
ENSG00000163512.14	17	No Class	AZI2	5-azacytidine induced 2	Cluster001
ENSG00000163516.14	276	No Class	ANKZF1	ankyrin repeat and zinc finger peptidyl tRNA hydrolase 1	Cluster001
ENSG00000163517.15	18	No Class	HDAC11	histone deacetylase 11	Cluster001
ENSG00000163535.18	22	No Class	SGO2	shugoshin 2	Cluster001
ENSG00000163545.10	6	No Class	NUAK2	NUAK family kinase 2	Cluster001
ENSG00000163611.11	17	No Class	SPICE1	spindle and centriole associated protein 1	Cluster001
ENSG00000163655.16	12	No Class	GMPS	guanine monophosphate synthase	Cluster001
ENSG00000163702.20	27	No Class	IL17RC	interleukin 17 receptor C	Cluster001
ENSG00000163900.11	84	No Class	TMEM41A	transmembrane protein 41A	Cluster001
ENSG00000163913.11	25	No Class	IFT122	intraflagellar transport 122	Cluster001
ENSG00000164048.14	2	No Class	ZNF589	zinc finger protein 589	Cluster001
ENSG00000164062.13	31	No Class	APEH	acylaminoacyl-peptide hydrolase	Cluster001
ENSG00000164074.15	99	No Class	ABHD18	abhydrolase domain containing 18	Cluster001
ENSG00000164077.14	9	No Class	MON1A	MON1 homolog A. secretory trafficking associated	Cluster001
ENSG00000164087.8	55	No Class	POC1A	POC1 centriolar protein A	Cluster001
ENSG00000164104.12	11	No Class	HMGB2	high mobility group box 2	Cluster001
ENSG00000164105.4	68	No Class	SAP30	Sin3A associated protein 30	Cluster001
ENSG00000164117.14	66	No Class	FBXO8	F-box protein 8	Cluster001
ENSG00000164118.13	67	No Class	CEP44	centrosomal protein 44	Cluster001
ENSG00000164125.15	12	No Class	GASK1B	golgi associated kinase 1B	Cluster001
ENSG00000164168.8	36	No Class	TMEM184C	transmembrane protein 184C	Cluster001
ENSG00000164252.13	284	No Class	AGGF1	angiogenic factor with G-patch and FHA domains 1	Cluster001
ENSG00000164306.11	4	No Class	PRIMPOL	primase and DNA directed polymerase	Cluster001
ENSG00000164331.10	42	No Class	ANKRA2	ankyrin repeat family A member 2	Cluster001
ENSG00000164414.18	143	No Class	SLC35A1	solute carrier family 35 member A1	Cluster001
ENSG00000164463.12	20	No Class	CREBRF	CREB3 regulatory factor	Cluster001
ENSG00000164463.12.1	20	No Class	CREBRF	CREB3 regulatory factor	Cluster001
ENSG00000164465.18	8	No Class	DCBLD1	discoidin. CUB and LCCL domain containing 1	Cluster001
ENSG00000164535.15	14	No Class	DAGLB	diacylglycerol lipase beta	Cluster001
ENSG00000164576.12	141	No Class	SAP30L	SAP30 like	Cluster001
ENSG00000164576.12.1	140	No Class	SAP30L	SAP30 like	Cluster001
ENSG00000164620.9	12	No Class	RELL2	RELT like 2	Cluster001
ENSG00000164620.9.1	6	No Class	RELL2	RELT like 2	Cluster001
ENSG00000164808.17	1	No Class	SPIDR	scaffold protein involved in DNA repair	Cluster001
ENSG00000164815.11	43	No Class	ORC5	origin recognition complex subunit 5	Cluster001
ENSG00000164916.11	14	No Class	FOXK1	forkhead box K1	Cluster001
ENSG00000164938.14	132	No Class	TP53INP1	tumor protein p53 inducible nuclear protein 1	Cluster001
ENSG00000164941.14	34	No Class	INTS8	integrator complex subunit 8	Cluster001
ENSG00000165025.15	237	No Class	SYK	spleen associated tyrosine kinase	Cluster001
ENSG00000165102.15	27	No Class	HGSNAT	heparan-alpha-glucosaminide N-acetyltransferase	Cluster001
ENSG00000165115.15	13	No Class	KIF27	kinesin family member 27	Cluster001
ENSG00000165121.11	13	No Class	AL353743.1	kinesin family member 27 (KIF27) pseudogene	Cluster001
ENSG00000165322.18	80	No Class	ARHGAP12	Rho GTPase activating protein 12	Cluster001
ENSG00000165359.15	22	No Class	INTS6L	integrator complex subunit 6 like	Cluster001
ENSG00000165406.16	13	No Class	MARCHF8	membrane associated ring-CH-type finger 8	Cluster001
ENSG00000165410.15	1	No Class	CFL2	cofilin 2	Cluster001
ENSG00000165458.14	47	No Class	INPPL1	inositol polyphosphate phosphatase like 1	Cluster001
ENSG00000165516.11	115	No Class	KLHDC2	kelch domain containing 2	Cluster001
ENSG00000165533.18	63	No Class	TTC8	tetratricopeptide repeat domain 8	Cluster001
ENSG00000165572.8	135	No Class	KBTBD6	kelch repeat and BTB domain containing 6	Cluster001
ENSG00000165675.16	40	No Class	ENOX2	ecto-NOX disulfide-thiol exchanger 2	Cluster001
ENSG00000165689.17	75	No Class	ENTR1	endosome associated trafficking regulator 1	Cluster001
ENSG00000165752.17	30	No Class	STK32C	serine/threonine kinase 32C	Cluster001
ENSG00000165792.17	72	No Class	METTL17	methyltransferase like 17	Cluster001
ENSG00000165801.10	73	No Class	ARHGEF40	Rho guanine nucleotide exchange factor 40	Cluster001
ENSG00000165802.22	8	No Class	NSMF	NMDA receptor synaptonuclear signaling and neuronal migration factor	Cluster001
ENSG00000165832.6	95	No Class	TRUB1	TruB pseudouridine synthase family member 1	Cluster001
ENSG00000165874.13	1	No Class	SHLD2P1	shieldin complex subunit 2 pseudogene 1	Cluster001
ENSG00000165898.14	29	No Class	ISCA2	iron-sulfur cluster assembly 2	Cluster001
ENSG00000165983.14	139	No Class	PTER	phosphotriesterase related	Cluster001
ENSG00000166037.11	319	No Class	CEP57	centrosomal protein 57	Cluster001
ENSG00000166133.18	5	No Class	RPUSD2	RNA pseudouridine synthase domain containing 2	Cluster001
ENSG00000166140.17	60	No Class	ZFYVE19	zinc finger FYVE-type containing 19	Cluster001
ENSG00000166169.17	302	No Class	POLL	DNA polymerase lambda	Cluster001
ENSG00000166170.9	11	No Class	BAG5	BCL2 associated athanogene 5	Cluster001
ENSG00000166272.18	122	No Class	WBP1L	WW domain binding protein 1 like	Cluster001
ENSG00000166348.18	14	No Class	USP54	ubiquitin specific peptidase 54	Cluster001
ENSG00000166452.12	67	No Class	AKIP1	A-kinase interacting protein 1	Cluster001
ENSG00000166454.10	1	No Class	ATMIN	ATM interactor	Cluster001
ENSG00000166508.18	95	No Class	MCM7	minichromosome maintenance complex component 7	Cluster001
ENSG00000166548.16	216	No Class	TK2	thymidine kinase 2	Cluster001
ENSG00000166704.11	119	No Class	ZNF606	zinc finger protein 606	Cluster001
ENSG00000166801.15	98	No Class	FAM111A	family with sequence similarity 111 member A	Cluster001
ENSG00000166803.13	1	No Class	PCLAF	PCNA clamp associated factor	Cluster001
ENSG00000166887.15	96	No Class	VPS39	VPS39 subunit of HOPS complex	Cluster001
ENSG00000166902.5	93	No Class	MRPL16	mitochondrial ribosomal protein L16	Cluster001
ENSG00000166928.11	12	No Class	MS4A14	membrane spanning 4-domains A14	Cluster001
ENSG00000166938.13	49	No Class	DIS3L	DIS3 like exosome 3 -5 exoribonuclease	Cluster001
ENSG00000166986.15	15	No Class	MARS1	methionyl-tRNA synthetase 1	Cluster001
ENSG00000166987.15	76	No Class	MBD6	methyl-CpG binding domain protein 6	Cluster001
ENSG00000167186.11	163	No Class	COQ7	coenzyme Q7. hydroxylase	Cluster001
ENSG00000167202.11	88	No Class	TBC1D2B	TBC1 domain family member 2B	Cluster001
ENSG00000167264.18	93	No Class	DUS2	dihydrouridine synthase 2	Cluster001
ENSG00000167280.16	74	No Class	ENGASE	endo-beta-N-acetylglucosaminidase	Cluster001
ENSG00000167291.16	2	No Class	TBC1D16	TBC1 domain family member 16	Cluster001
ENSG00000167302.10	28	No Class	TEPSIN	TEPSIN adaptor related protein complex 4 accessory protein	Cluster001
ENSG00000167333.13	57	No Class	TRIM68	tripartite motif containing 68	Cluster001
ENSG00000167525.13	104	No Class	PROCA1	protein interacting with cyclin A1	Cluster001
ENSG00000167528.12	105	No Class	ZNF641	zinc finger protein 641	Cluster001
ENSG00000167566.17	43	No Class	NCKAP5L	NCK associated protein 5 like	Cluster001
ENSG00000167670.16	1	No Class	CHAF1A	chromatin assembly factor 1 subunit A	Cluster001
ENSG00000167702.12	25	No Class	KIFC2	kinesin family member C2	Cluster001
ENSG00000167716.18	79	No Class	WDR81	WD repeat domain 81	Cluster001
ENSG00000167740.9	82	No Class	CYB5D2	cytochrome b5 domain containing 2	Cluster001
ENSG00000167766.18	30	No Class	ZNF83	zinc finger protein 83	Cluster001
ENSG00000167840.13	60	No Class	ZNF232	zinc finger protein 232	Cluster001
ENSG00000167930.17	146	No Class	FAM234A	family with sequence similarity 234 member A	Cluster001
ENSG00000168010.11	62	No Class	ATG16L2	autophagy related 16 like 2	Cluster001
ENSG00000168067.12	60	No Class	MAP4K2	mitogen-activated protein kinase kinase kinase kinase 2	Cluster001
ENSG00000168286.3	64	No Class	THAP11	THAP domain containing 11	Cluster001
ENSG00000168291.13	57	No Class	PDHB	pyruvate dehydrogenase E1 beta subunit	Cluster001
ENSG00000168297.16	9	No Class	PXK	PX domain containing serine/threonine kinase like	Cluster001
ENSG00000168300.14	70	No Class	PCMTD1	protein-L-isoaspartate (D-aspartate) O-methyltransferase domain containing 1	Cluster001
ENSG00000168310.11	21	No Class	IRF2	interferon regulatory factor 2	Cluster001
ENSG00000168434.13	18	No Class	COG7	component of oligomeric golgi complex 7	Cluster001
ENSG00000168438.15	71	No Class	CDC40	cell division cycle 40	Cluster001
ENSG00000168538.16	190	No Class	TRAPPC11	trafficking protein particle complex 11	Cluster001
ENSG00000168763.16	7	No Class	CNNM3	cyclin and CBS domain divalent metal cation transport mediator 3	Cluster001
ENSG00000168802.13	86	No Class	CHTF8	chromosome transmission fidelity factor 8	Cluster001
ENSG00000168887.11	223	No Class	C2orf68	chromosome 2 open reading frame 68	Cluster001
ENSG00000168936.11	25	No Class	TMEM129	transmembrane protein 129	Cluster001
ENSG00000168944.15	301	No Class	CEP120	centrosomal protein 120	Cluster001
ENSG00000168970.22	22	No Class	JMJD7-PLA2G4B	JMJD7-PLA2G4B readthrough	Cluster001
ENSG00000169084.15	104	No Class	DHRSX	dehydrogenase/reductase X-linked	Cluster001
ENSG00000169228.14	73	No Class	RAB24	RAB24. member RAS oncogene family	Cluster001
ENSG00000169231.13	6	No Class	THBS3	thrombospondin 3	Cluster001
ENSG00000169249.12	13	No Class	ZRSR2	zinc finger CCCH-type. RNA binding motif and serine/arginine rich 2	Cluster001
ENSG00000169359.16	13	No Class	SLC33A1	solute carrier family 33 member 1	Cluster001
ENSG00000169403.12	1	No Class	PTAFR	platelet activating factor receptor	Cluster001
ENSG00000169570.10	9	No Class	DTWD2	DTW domain containing 2	Cluster001
ENSG00000169683.8	12	No Class	LRRC45	leucine rich repeat containing 45	Cluster001
ENSG00000169740.14	102	No Class	ZNF32	zinc finger protein 32	Cluster001
ENSG00000169925.17	260	No Class	BRD3	bromodomain containing 3	Cluster001
ENSG00000169955.7	58	No Class	ZNF747	zinc finger protein 747	Cluster001
ENSG00000169957.10	218	No Class	ZNF768	zinc finger protein 768	Cluster001
ENSG00000169964.8	116	No Class	TMEM42	transmembrane protein 42	Cluster001
ENSG00000169967.16	9	No Class	MAP3K2	mitogen-activated protein kinase kinase kinase 2	Cluster001
ENSG00000170043.12	55	No Class	TRAPPC1	trafficking protein particle complex 1	Cluster001
ENSG00000170190.16	70	No Class	SLC16A5	solute carrier family 16 member 5	Cluster001
ENSG00000170365.10	30	No Class	SMAD1	SMAD family member 1	Cluster001
ENSG00000170581.14	222	No Class	STAT2	signal transducer and activator of transcription 2	Cluster001
ENSG00000170604.5	97	No Class	IRF2BP1	interferon regulatory factor 2 binding protein 1	Cluster001
ENSG00000170632.14	29	No Class	ARMC10	armadillo repeat containing 10	Cluster001
ENSG00000170802.16	8	No Class	FOXN2	forkhead box N2	Cluster001
ENSG00000170917.14	5	No Class	NUDT6	nudix hydrolase 6	Cluster001
ENSG00000171100.14	142	No Class	MTM1	myotubularin 1	Cluster001
ENSG00000171148.13	143	No Class	TADA3	transcriptional adaptor 3	Cluster001
ENSG00000171169.9	66	No Class	NAIF1	nuclear apoptosis inducing factor 1	Cluster001
ENSG00000171206.14	133	No Class	TRIM8	tripartite motif containing 8	Cluster001
ENSG00000171443.7	97	No Class	ZNF524	zinc finger protein 524	Cluster001
ENSG00000171469.11	55	No Class	ZNF561	zinc finger protein 561	Cluster001
ENSG00000171703.17	75	No Class	TCEA2	transcription elongation factor A2	Cluster001
ENSG00000171720.10	220	No Class	HDAC3	histone deacetylase 3	Cluster001
ENSG00000171792.11	34	No Class	RHNO1	RAD9-HUS1-RAD1 interacting nuclear orphan 1	Cluster001
ENSG00000171792.11.1	125	No Class	RHNO1	RAD9-HUS1-RAD1 interacting nuclear orphan 1	Cluster001
ENSG00000171940.13	28	No Class	ZNF217	zinc finger protein 217	Cluster001
ENSG00000172006.12	118	No Class	ZNF554	zinc finger protein 554	Cluster001
ENSG00000172046.19	158	No Class	USP19	ubiquitin specific peptidase 19	Cluster001
ENSG00000172057.10	220	No Class	ORMDL3	ORMDL sphingolipid biosynthesis regulator 3	Cluster001
ENSG00000172113.9	2	No Class	NME6	NME/NM23 nucleoside diphosphate kinase 6	Cluster001
ENSG00000172244.9	2	No Class	C5orf34	chromosome 5 open reading frame 34	Cluster001
ENSG00000172349.17	50	No Class	IL16	interleukin 16	Cluster001
ENSG00000172375.13	104	No Class	C2CD2L	C2CD2 like	Cluster001
ENSG00000172465.14	124	No Class	TCEAL1	transcription elongation factor A like 1	Cluster001
ENSG00000172469.16	153	No Class	MANEA	mannosidase endo-alpha	Cluster001
ENSG00000172613.8	100	No Class	RAD9A	RAD9 checkpoint clamp component A	Cluster001
ENSG00000172667.11	66	No Class	ZMAT3	zinc finger matrin-type 3	Cluster001
ENSG00000172830.13	178	No Class	SSH3	slingshot protein phosphatase 3	Cluster001
ENSG00000172845.15	80	No Class	SP3	Sp3 transcription factor	Cluster001
ENSG00000172932.15	8	No Class	ANKRD13D	ankyrin repeat domain 13D	Cluster001
ENSG00000173013.6	3	No Class	CCDC96	coiled-coil domain containing 96	Cluster001
ENSG00000173020.11	295	No Class	GRK2	G protein-coupled receptor kinase 2	Cluster001
ENSG00000173041.12	130	No Class	ZNF680	zinc finger protein 680	Cluster001
ENSG00000173137.12	50	No Class	ADCK5	aarF domain containing kinase 5	Cluster001
ENSG00000173209.23	87	No Class	AHSA2P	activator of HSP90 ATPase homolog 2. pseudogene	Cluster001
ENSG00000173456.5	159	No Class	RNF26	ring finger protein 26	Cluster001
ENSG00000173614.14	147	No Class	NMNAT1	nicotinamide nucleotide adenylyltransferase 1	Cluster001
ENSG00000173928.3	12	No Class	SWSAP1	SWIM-type zinc finger 7 associated protein 1	Cluster001
ENSG00000174125.8	6	No Class	TLR1	toll like receptor 1	Cluster001
ENSG00000174130.12	2	No Class	TLR6	toll like receptor 6	Cluster001
ENSG00000174243.10	71	No Class	DDX23	DEAD-box helicase 23	Cluster001
ENSG00000174282.12	215	No Class	ZBTB4	zinc finger and BTB domain containing 4	Cluster001
ENSG00000174516.15	11	No Class	PELI3	pellino E3 ubiquitin protein ligase family member 3	Cluster001
ENSG00000174606.14	90	No Class	ANGEL2	angel homolog 2	Cluster001
ENSG00000174684.7	172	No Class	B4GAT1	beta-1.4-glucuronyltransferase 1	Cluster001
ENSG00000174791.11	54	No Class	RIN1	Ras and Rab interactor 1	Cluster001
ENSG00000174989.13	1	No Class	FBXW8	F-box and WD repeat domain containing 8	Cluster001
ENSG00000175087.10	67	No Class	PDIK1L	PDLIM1 interacting kinase 1 like	Cluster001
ENSG00000175137.11	195	No Class	SH3BP5L	SH3 binding domain protein 5 like	Cluster001
ENSG00000175198.17	1	No Class	PCCA	propionyl-CoA carboxylase subunit alpha	Cluster001
ENSG00000175215.11	167	No Class	CTDSP2	CTD small phosphatase 2	Cluster001
ENSG00000175220.12	224	No Class	ARHGAP1	Rho GTPase activating protein 1	Cluster001
ENSG00000175348.11	12	No Class	TMEM9B	TMEM9 domain family member B	Cluster001
ENSG00000175455.15	32	No Class	CCDC14	coiled-coil domain containing 14	Cluster001
ENSG00000175538.10	154	No Class	KCNE3	potassium voltage-gated channel subfamily E regulatory subunit 3	Cluster001
ENSG00000175575.12	160	No Class	PAAF1	proteasomal ATPase associated factor 1	Cluster001
ENSG00000175591.11	10	No Class	P2RY2	purinergic receptor P2Y2	Cluster001
ENSG00000175595.15	35	No Class	ERCC4	ERCC excision repair 4. endonuclease catalytic subunit	Cluster001
ENSG00000175691.9	17	No Class	ZNF77	zinc finger protein 77	Cluster001
ENSG00000175938.7	169	No Class	ORAI3	ORAI calcium release-activated calcium modulator 3	Cluster001
ENSG00000176055.10	49	No Class	MBLAC2	metallo-beta-lactamase domain containing 2	Cluster001
ENSG00000176208.9	78	No Class	ATAD5	ATPase family AAA domain containing 5	Cluster001
ENSG00000176371.14	43	No Class	ZSCAN2	zinc finger and SCAN domain containing 2	Cluster001
ENSG00000176454.14	41	No Class	LPCAT4	lysophosphatidylcholine acyltransferase 4	Cluster001
ENSG00000176834.14	7	No Class	VSIG10	V-set and immunoglobulin domain containing 10	Cluster001
ENSG00000176896.8	44	No Class	TCEANC	transcription elongation factor A N-terminal and central domain containing	Cluster001
ENSG00000176994.11	1	No Class	SMCR8	SMCR8-C9orf72 complex subunit	Cluster001
ENSG00000177042.14	100	No Class	TMEM80	transmembrane protein 80	Cluster001
ENSG00000177169.10	59	No Class	ULK1	unc-51 like autophagy activating kinase 1	Cluster001
ENSG00000177463.15	22	No Class	NR2C2	nuclear receptor subfamily 2 group C member 2	Cluster001
ENSG00000177565.17	22	No Class	TBL1XR1	transducin beta like 1 X-linked receptor 1	Cluster001
ENSG00000177595.18	93	No Class	PIDD1	p53-induced death domain protein 1	Cluster001
ENSG00000177692.11	33	No Class	DNAJC28	DnaJ heat shock protein family (Hsp40) member C28	Cluster001
ENSG00000177728.17	83	No Class	TMEM94	transmembrane protein 94	Cluster001
ENSG00000177853.14	41	No Class	ZNF518A	zinc finger protein 518A	Cluster001
ENSG00000177873.14	24	No Class	ZNF619	zinc finger protein 619	Cluster001
ENSG00000177932.7	90	No Class	ZNF354C	zinc finger protein 354C	Cluster001
ENSG00000177981.11	235	No Class	ASB8	ankyrin repeat and SOCS box containing 8	Cluster001
ENSG00000178028.14	278	No Class	DMAP1	DNA methyltransferase 1 associated protein 1	Cluster001
ENSG00000178096.9	97	No Class	BOLA1	bolA family member 1	Cluster001
ENSG00000178425.14	40	No Class	NT5DC1	5 -nucleotidase domain containing 1	Cluster001
ENSG00000178537.10	11	No Class	SLC25A20	solute carrier family 25 member 20	Cluster001
ENSG00000178761.15	61	No Class	FAM219B	family with sequence similarity 219 member B	Cluster001
ENSG00000178927.18	43	No Class	CYBC1	cytochrome b-245 chaperone 1	Cluster001
ENSG00000178966.16	33	No Class	RMI1	RecQ mediated genome instability 1	Cluster001
ENSG00000178988.11	7	No Class	MRFAP1L1	Morf4 family associated protein 1 like 1	Cluster001
ENSG00000178996.14	85	No Class	SNX18	sorting nexin 18	Cluster001
ENSG00000179152.20	202	No Class	TCAIM	T cell activation inhibitor. mitochondrial	Cluster001
ENSG00000179364.13	190	No Class	PACS2	phosphofurin acidic cluster sorting protein 2	Cluster001
ENSG00000179456.10	213	No Class	ZBTB18	zinc finger and BTB domain containing 18	Cluster001
ENSG00000179912.20	178	No Class	R3HDM2	R3H domain containing 2	Cluster001
ENSG00000179933.6	1	No Class	C14orf119	chromosome 14 open reading frame 119	Cluster001
ENSG00000179988.14	12	No Class	PSTK	phosphoseryl-tRNA kinase	Cluster001
ENSG00000180035.13	45	No Class	ZNF48	zinc finger protein 48	Cluster001
ENSG00000180104.16	162	No Class	EXOC3	exocyst complex component 3	Cluster001
ENSG00000180229.12	53	No Class	HERC2P3	hect domain and RLD 2 pseudogene 3	Cluster001
ENSG00000180257.13	81	No Class	ZNF816	zinc finger protein 816	Cluster001
ENSG00000180357.9	40	No Class	ZNF609	zinc finger protein 609	Cluster001
ENSG00000180787.6	79	No Class	ZFP3	ZFP3 zinc finger protein	Cluster001
ENSG00000180855.16	62	No Class	ZNF443	zinc finger protein 443	Cluster001
ENSG00000180884.10	59	No Class	ZNF792	zinc finger protein 792	Cluster001
ENSG00000180917.17	61	No Class	CMTR2	cap methyltransferase 2	Cluster001
ENSG00000180979.10	20	No Class	LRRC57	leucine rich repeat containing 57	Cluster001
ENSG00000181004.10	62	No Class	BBS12	Bardet-Biedl syndrome 12	Cluster001
ENSG00000181038.13	96	No Class	METTL23	methyltransferase like 23	Cluster001
ENSG00000181274.7	25	No Class	FRAT2	FRAT regulator of WNT signaling pathway 2	Cluster001
ENSG00000181284.3	5	No Class	TMEM102	transmembrane protein 102	Cluster001
ENSG00000181467.5	119	No Class	RAP2B	RAP2B. member of RAS oncogene family	Cluster001
ENSG00000181481.14	122	No Class	RNF135	ring finger protein 135	Cluster001
ENSG00000181638.19	2	No Class	ZFP41	ZFP41 zinc finger protein	Cluster001
ENSG00000181826.10	6	No Class	RELL1	RELT like 1	Cluster001
ENSG00000181827.15	64	No Class	RFX7	regulatory factor X7	Cluster001
ENSG00000181830.9	27	No Class	SLC35C1	solute carrier family 35 member C1	Cluster001
ENSG00000182095.14	67	No Class	TNRC18	trinucleotide repeat containing 18	Cluster001
ENSG00000182173.13	2	No Class	TSEN54	tRNA splicing endonuclease subunit 54	Cluster001
ENSG00000182179.13	105	No Class	UBA7	ubiquitin like modifier activating enzyme 7	Cluster001
ENSG00000182359.15	10	No Class	KBTBD3	kelch repeat and BTB domain containing 3	Cluster001
ENSG00000182685.7	3	No Class	BRICD5	BRICHOS domain containing 5	Cluster001
ENSG00000182700.5	3	No Class	IGIP	IgA inducing protein	Cluster001
ENSG00000182796.14	1	No Class	TMEM198B	transmembrane protein 198B (pseudogene)	Cluster001
ENSG00000182810.6	72	No Class	DDX28	DEAD-box helicase 28	Cluster001
ENSG00000182858.14	23	No Class	ALG12	ALG12 alpha-1.6-mannosyltransferase	Cluster001
ENSG00000183161.6	120	No Class	FANCF	FA complementation group F	Cluster001
ENSG00000183255.12	26	No Class	PTTG1IP	PTTG1 interacting protein	Cluster001
ENSG00000183401.12	2	No Class	CCDC159	coiled-coil domain containing 159	Cluster001
ENSG00000183496.6	90	No Class	MEX3B	mex-3 RNA binding family member B	Cluster001
ENSG00000183597.16	34	No Class	TANGO2	transport and golgi organization 2 homolog	Cluster001
ENSG00000183723.12	88	No Class	CMTM4	CKLF like MARVEL transmembrane domain containing 4	Cluster001
ENSG00000184207.9	68	No Class	PGP	phosphoglycolate phosphatase	Cluster001
ENSG00000184208.12	153	No Class	C22orf46	chromosome 22 open reading frame 46	Cluster001
ENSG00000184465.16	14	No Class	WDR27	WD repeat domain 27	Cluster001
ENSG00000184481.17	76	No Class	FOXO4	forkhead box O4	Cluster001
ENSG00000184575.12	186	No Class	XPOT	exportin for tRNA	Cluster001
ENSG00000184619.6	26	No Class	KRBA2	KRAB-A domain containing 2	Cluster001
ENSG00000184635.16	65	No Class	ZNF93	zinc finger protein 93	Cluster001
ENSG00000184898.7	64	No Class	RBM43	RNA binding motif protein 43	Cluster001
ENSG00000184923.12	22	No Class	NUTM2A	NUT family member 2A	Cluster001
ENSG00000184939.16	99	No Class	ZFP90	ZFP90 zinc finger protein	Cluster001
ENSG00000184992.13	168	No Class	BRI3BP	BRI3 binding protein	Cluster001
ENSG00000185158.12	5	No Class	LRRC37B	leucine rich repeat containing 37B	Cluster001
ENSG00000185189.18	75	No Class	NRBP2	nuclear receptor binding protein 2	Cluster001
ENSG00000185252.19	31	No Class	ZNF74	zinc finger protein 74	Cluster001
ENSG00000185278.15	73	No Class	ZBTB37	zinc finger and BTB domain containing 37	Cluster001
ENSG00000185324.22	70	No Class	CDK10	cyclin dependent kinase 10	Cluster001
ENSG00000185340.15	10	No Class	GAS2L1	growth arrest specific 2 like 1	Cluster001
ENSG00000185480.11	19	No Class	PARPBP	PARP1 binding protein	Cluster001
ENSG00000185515.14	116	No Class	BRCC3	BRCA1/BRCA2-containing complex subunit 3	Cluster001
ENSG00000185515.14.1	12	No Class	BRCC3	BRCA1/BRCA2-containing complex subunit 3	Cluster001
ENSG00000185670.9	44	No Class	ZBTB3	zinc finger and BTB domain containing 3	Cluster001
ENSG00000185722.18	150	No Class	ANKFY1	ankyrin repeat and FYVE domain containing 1	Cluster001
ENSG00000185753.13	75	No Class	CXorf38	chromosome X open reading frame 38	Cluster001
ENSG00000185811.19	123	No Class	IKZF1	IKAROS family zinc finger 1	Cluster001
ENSG00000185862.7	11	No Class	EVI2B	ecotropic viral integration site 2B	Cluster001
ENSG00000186104.10	21	No Class	CYP2R1	cytochrome P450 family 2 subfamily R member 1	Cluster001
ENSG00000186106.11	50	No Class	ANKRD46	ankyrin repeat domain 46	Cluster001
ENSG00000186260.16	1	No Class	MRTFB	myocardin related transcription factor B	Cluster001
ENSG00000186298.12	70	No Class	PPP1CC	protein phosphatase 1 catalytic subunit gamma	Cluster001
ENSG00000186318.16	55	No Class	BACE1	beta-secretase 1	Cluster001
ENSG00000186350.12	217	No Class	RXRA	retinoid X receptor alpha	Cluster001
ENSG00000186364.12	3	No Class	NUDT17	nudix hydrolase 17	Cluster001
ENSG00000186376.15	247	No Class	ZNF75D	zinc finger protein 75D	Cluster001
ENSG00000186399.10	1	No Class	GOLGA8R	golgin A8 family member R	Cluster001
ENSG00000186496.12	47	No Class	ZNF396	zinc finger protein 396	Cluster001
ENSG00000186517.14	143	No Class	ARHGAP30	Rho GTPase activating protein 30	Cluster001
ENSG00000186532.12	334	No Class	SMYD4	SET and MYND domain containing 4	Cluster001
ENSG00000186577.14	32	No Class	SMIM29	small integral membrane protein 29	Cluster001
ENSG00000186638.16	145	No Class	KIF24	kinesin family member 24	Cluster001
ENSG00000186814.14	159	No Class	ZSCAN30	zinc finger and SCAN domain containing 30	Cluster001
ENSG00000187609.16	27	No Class	EXD3	exonuclease 3 -5 domain containing 3	Cluster001
ENSG00000187626.9	131	No Class	ZKSCAN4	zinc finger with KRAB and SCAN domains 4	Cluster001
ENSG00000187713.7	101	No Class	TMEM203	transmembrane protein 203	Cluster001
ENSG00000187792.5	56	No Class	ZNF70	zinc finger protein 70	Cluster001
ENSG00000187815.10	69	No Class	ZFP69	ZFP69 zinc finger protein	Cluster001
ENSG00000187954.12	9	No Class	CYHR1	cysteine and histidine rich 1	Cluster001
ENSG00000188060.7	1	No Class	RAB42	RAB42. member RAS oncogene family	Cluster001
ENSG00000188483.8	33	No Class	IER5L	immediate early response 5 like	Cluster001
ENSG00000188493.15	35	No Class	C19orf54	chromosome 19 open reading frame 54	Cluster001
ENSG00000188554.14	200	No Class	NBR1	NBR1 autophagy cargo receptor	Cluster001
ENSG00000188566.13	15	No Class	NDOR1	NADPH dependent diflavin oxidoreductase 1	Cluster001
ENSG00000188822.8	2	No Class	CNR2	cannabinoid receptor 2	Cluster001
ENSG00000188868.14	7	No Class	ZNF563	zinc finger protein 563	Cluster001
ENSG00000188986.7	103	No Class	NELFB	negative elongation factor complex member B	Cluster001
ENSG00000189014.7	7	No Class	SHLD2P3	shieldin complex subunit 2 pseudogene 3	Cluster001
ENSG00000189298.14	222	No Class	ZKSCAN3	zinc finger with KRAB and SCAN domains 3	Cluster001
ENSG00000189319.14	212	No Class	FAM53B	family with sequence similarity 53 member B	Cluster001
ENSG00000189339.12	326	No Class	SLC35E2B	solute carrier family 35 member E2B	Cluster001
ENSG00000196151.10	9	No Class	WDSUB1	WD repeat. sterile alpha motif and U-box domain containing 1	Cluster001
ENSG00000196214.11	55	No Class	ZNF766	zinc finger protein 766	Cluster001
ENSG00000196227.11	117	No Class	FAM217B	family with sequence similarity 217 member B	Cluster001
ENSG00000196290.15	147	No Class	NIF3L1	NGG1 interacting factor 3 like 1	Cluster001
ENSG00000196323.14	138	No Class	ZBTB44	zinc finger and BTB domain containing 44	Cluster001
ENSG00000196372.13	110	No Class	ASB13	ankyrin repeat and SOCS box containing 13	Cluster001
ENSG00000196456.13	48	No Class	ZNF775	zinc finger protein 775	Cluster001
ENSG00000196466.10	183	No Class	ZNF799	zinc finger protein 799	Cluster001
ENSG00000196544.8	203	No Class	BORCS6	BLOC-1 related complex subunit 6	Cluster001
ENSG00000196547.15	61	No Class	MAN2A2	mannosidase alpha class 2A member 2	Cluster001
ENSG00000196659.10	32	No Class	TTC30B	tetratricopeptide repeat domain 30B	Cluster001
ENSG00000196678.14	81	No Class	ERI2	ERI1 exoribonuclease family member 2	Cluster001
ENSG00000196700.9	204	No Class	ZNF512B	zinc finger protein 512B	Cluster001
ENSG00000196757.8	133	No Class	ZNF700	zinc finger protein 700	Cluster001
ENSG00000196922.10	129	No Class	ZNF252P	zinc finger protein 252. pseudogene	Cluster001
ENSG00000197044.11	17	No Class	ZNF441	zinc finger protein 441	Cluster001
ENSG00000197062.11	110	No Class	ZSCAN26	zinc finger and SCAN domain containing 26	Cluster001
ENSG00000197070.14	11	No Class	ARRDC1	arrestin domain containing 1	Cluster001
ENSG00000197162.10	55	No Class	ZNF785	zinc finger protein 785	Cluster001
ENSG00000197183.14	2	No Class	NOL4L	nucleolar protein 4 like	Cluster001
ENSG00000197226.12	100	No Class	TBC1D9B	TBC1 domain family member 9B	Cluster001
ENSG00000197363.9	148	No Class	ZNF517	zinc finger protein 517	Cluster001
ENSG00000197386.12	28	No Class	HTT	huntingtin	Cluster001
ENSG00000197530.12	6	No Class	MIB2	mindbomb E3 ubiquitin protein ligase 2	Cluster001
ENSG00000197548.12	7	No Class	ATG7	autophagy related 7	Cluster001
ENSG00000197557.7	17	No Class	TTC30A	tetratricopeptide repeat domain 30A	Cluster001
ENSG00000197971.16	46	No Class	MBP	myelin basic protein	Cluster001
ENSG00000198001.13	4	No Class	AC093012.1	interleukin 1 receptor associated kinase 4	Cluster001
ENSG00000198056.15	2	No Class	PRIM1	DNA primase subunit 1	Cluster001
ENSG00000198081.11	85	No Class	ZBTB14	zinc finger and BTB domain containing 14	Cluster001
ENSG00000198105.14	7	No Class	ZNF248	zinc finger protein 248	Cluster001
ENSG00000198169.9	70	No Class	ZNF251	zinc finger protein 251	Cluster001
ENSG00000198382.9	53	No Class	UVRAG	UV radiation resistance associated	Cluster001
ENSG00000198416.9	5	No Class	ZNF658B	zinc finger protein 658B (pseudogene)	Cluster001
ENSG00000198420.10	176	No Class	TCAF1	TRPM8 channel associated factor 1	Cluster001
ENSG00000198453.13	21	No Class	ZNF568	zinc finger protein 568	Cluster001
ENSG00000198551.10	3	No Class	ZNF627	zinc finger protein 627	Cluster001
ENSG00000198689.11	174	No Class	SLC9A6	solute carrier family 9 member A6	Cluster001
ENSG00000198690.10	117	No Class	FAN1	FANCD2 and FANCI associated nuclease 1	Cluster001
ENSG00000198728.11	113	No Class	LDB1	LIM domain binding 1	Cluster001
ENSG00000198736.11	40	No Class	MSRB1	methionine sulfoxide reductase B1	Cluster001
ENSG00000198740.8	47	No Class	ZNF652	zinc finger protein 652	Cluster001
ENSG00000198826.11	3	No Class	ARHGAP11A	Rho GTPase activating protein 11A	Cluster001
ENSG00000198837.10	77	No Class	DENND4B	DENN domain containing 4B	Cluster001
ENSG00000198876.13	226	No Class	DCAF12	DDB1 and CUL4 associated factor 12	Cluster001
ENSG00000198890.9	51	No Class	PRMT6	protein arginine methyltransferase 6	Cluster001
ENSG00000198901.14	1	No Class	PRC1	protein regulator of cytokinesis 1	Cluster001
ENSG00000198909.7	212	No Class	MAP3K3	mitogen-activated protein kinase kinase kinase 3	Cluster001
ENSG00000198924.8	16	No Class	DCLRE1A	DNA cross-link repair 1A	Cluster001
ENSG00000198925.12	168	No Class	ATG9A	autophagy related 9A	Cluster001
ENSG00000198945.8	33	No Class	L3MBTL3	L3MBTL histone methyl-lysine binding protein 3	Cluster001
ENSG00000203705.11	38	No Class	TATDN3	TatD DNase domain containing 3	Cluster001
ENSG00000203880.12	93	No Class	PCMTD2	protein-L-isoaspartate (D-aspartate) O-methyltransferase domain containing 2	Cluster001
ENSG00000204084.13	39	No Class	INPP5B	inositol polyphosphate-5-phosphatase B	Cluster001
ENSG00000204172.12	19	No Class	AGAP9	ArfGAP with GTPase domain. ankyrin repeat and PH domain 9	Cluster001
ENSG00000204177.10	17	No Class	BMS1P1	BMS1 pseudogene 1	Cluster001
ENSG00000204177.10.1	17	No Class	BMS1P1	BMS1 pseudogene 1	Cluster001
ENSG00000204237.5	37	No Class	OXLD1	oxidoreductase like domain containing 1	Cluster001
ENSG00000204304.12	55	No Class	PBX2	PBX homeobox 2	Cluster001
ENSG00000204611.7	1	No Class	ZNF616	zinc finger protein 616	Cluster001
ENSG00000205084.11	1	No Class	TMEM231	transmembrane protein 231	Cluster001
ENSG00000205133.12	66	No Class	TRIQK	triple QxxK/R motif containing	Cluster001
ENSG00000205583.13	42	No Class	STAG3L1	stromal antigen 3-like 1 (pseudogene)	Cluster001
ENSG00000205643.11	90	No Class	CDPF1	cysteine rich DPF motif domain containing 1	Cluster001
ENSG00000205744.10	160	No Class	DENND1C	DENN domain containing 1C	Cluster001
ENSG00000205808.7	146	No Class	PLPP6	phospholipid phosphatase 6	Cluster001
ENSG00000205981.8	3	No Class	DNAJC19	DnaJ heat shock protein family (Hsp40) member C19	Cluster001
ENSG00000206149.10	69	No Class	HERC2P9	hect domain and RLD 2 pseudogene 9	Cluster001
ENSG00000206282.11	68	No Class	RGL2	ral guanine nucleotide dissociation stimulator like 2	Cluster001
ENSG00000213213.14	69	No Class	CCDC183	coiled-coil domain containing 183	Cluster001
ENSG00000213380.15	252	No Class	COG8	component of oligomeric golgi complex 8	Cluster001
ENSG00000213390.11	123	No Class	ARHGAP19	Rho GTPase activating protein 19	Cluster001
ENSG00000213445.10	7	No Class	SIPA1	signal-induced proliferation-associated 1	Cluster001
ENSG00000213465.8	11	No Class	ARL2	ADP ribosylation factor like GTPase 2	Cluster001
ENSG00000213563.7	8	No Class	C8orf82	chromosome 8 open reading frame 82	Cluster001
ENSG00000213672.8	35	No Class	NCKIPSD	NCK interacting protein with SH3 domain	Cluster001
ENSG00000213699.9	2	No Class	SLC35F6	solute carrier family 35 member F6	Cluster001
ENSG00000213930.11	163	No Class	GALT	galactose-1-phosphate uridylyltransferase	Cluster001
ENSG00000213983.12	314	No Class	AP1G2	adaptor related protein complex 1 subunit gamma 2	Cluster001
ENSG00000214114.9	15	No Class	MYCBP	MYC binding protein	Cluster001
ENSG00000214425.8	1	No Class	LRRC37A4P	leucine rich repeat containing 37 member A4. pseudogene	Cluster001
ENSG00000214562.14	75	No Class	NUTM2D	NUT family member 2D	Cluster001
ENSG00000214717.12	188	No Class	ZBED1	zinc finger BED-type containing 1	Cluster001
ENSG00000214765.8	99	No Class	SEPTIN7P2	septin 7 pseudogene 2	Cluster001
ENSG00000215012.9	38	No Class	RTL10	retrotransposon Gag like 10	Cluster001
ENSG00000215883.10	166	No Class	CYB5RL	cytochrome b5 reductase like	Cluster001
ENSG00000215908.10	49	No Class	CROCCP2	CROCC pseudogene 2	Cluster001
ENSG00000219545.11	41	No Class	UMAD1	UBAP1-MVB12-associated (UMA) domain containing 1	Cluster001
ENSG00000221838.10	22	No Class	AP4M1	adaptor related protein complex 4 subunit mu 1	Cluster001
ENSG00000221886.4	25	No Class	ZBED8	zinc finger BED-type containing 8	Cluster001
ENSG00000222011.9	3	No Class	FAM185A	family with sequence similarity 185 member A	Cluster001
ENSG00000223459.6	4	No Class	TCAF1P1	TRPM8 channel associated factor 1 pseudogene 1	Cluster001
ENSG00000224841.9	65	No Class	RGL2	ral guanine nucleotide dissociation stimulator like 2	Cluster001
ENSG00000225973.4	66	No Class	PIGBOS1	PIGB opposite strand 1	Cluster001
ENSG00000225987.7	17	No Class	PBX2	PBX homeobox 2	Cluster001
ENSG00000227345.8	108	No Class	PARG	poly(ADP-ribose) glycohydrolase	Cluster001
ENSG00000227372.12	189	No Class	TP73-AS1	TP73 antisense RNA 1	Cluster001
ENSG00000228451.4	1	No Class	SDAD1P1	SDA1 domain containing 1 pseudogene 1	Cluster001
ENSG00000228594.4	4	No Class	FNDC10	fibronectin type III domain containing 10	Cluster001
ENSG00000228736.9	111	No Class	RGL2	ral guanine nucleotide dissociation stimulator like 2	Cluster001
ENSG00000229809.8	137	No Class	ZNF688	zinc finger protein 688	Cluster001
ENSG00000233369.7	122	No Class	GTF2IP4	general transcription factor IIi pseudogene 4	Cluster001
ENSG00000234420.7	17	No Class	ZNF37BP	zinc finger protein 37B. pseudogene	Cluster001
ENSG00000235106.10	60	No Class	BRD3OS	BRD3 opposite strand	Cluster001
ENSG00000235106.10.1	60	No Class	BRD3OS	BRD3 opposite strand	Cluster001
ENSG00000237441.10	14	No Class	RGL2	ral guanine nucleotide dissociation stimulator like 2	Cluster001
ENSG00000237825.9	111	No Class	RGL2	ral guanine nucleotide dissociation stimulator like 2	Cluster001
ENSG00000238227.8	37	No Class	TMEM250	transmembrane protein 250	Cluster001
ENSG00000239282.7	7	No Class	CASTOR1	cytosolic arginine sensor for mTORC1 subunit 1	Cluster001
ENSG00000239521.8	7	No Class	CASTOR3	CASTOR family member 3	Cluster001
ENSG00000239779.7	74	No Class	WBP1	WW domain binding protein 1	Cluster001
ENSG00000242110.8	50	No Class	AMACR	alpha-methylacyl-CoA racemase	Cluster001
ENSG00000242294.6	14	No Class	STAG3L5P	stromal antigen 3-like 5 pseudogene	Cluster001
ENSG00000243364.8	32	No Class	EFNA4	ephrin A4	Cluster001
ENSG00000243667.7	65	No Class	WDR92	WD repeat domain 92	Cluster001
ENSG00000244509.4	38	No Class	APOBEC3C	apolipoprotein B mRNA editing enzyme catalytic subunit 3C	Cluster001
ENSG00000244560.7	42	No Class	AC004890.2	zinc finger protein pseudogene	Cluster001
ENSG00000248919.7	2	No Class	ATP5MF-PTCD1	ATP5MF-PTCD1 readthrough	Cluster001
ENSG00000249115.9	64	No Class	HAUS5	HAUS augmin like complex subunit 5	Cluster001
ENSG00000249915.8	60	No Class	PDCD6	programmed cell death 6	Cluster001
ENSG00000250021.7	7	No Class	ARPIN-AP3S2	ARPIN-AP3S2 readthrough	Cluster001
ENSG00000250317.8	68	No Class	SMIM20	small integral membrane protein 20	Cluster001
ENSG00000250510.8	51	No Class	GPR162	G protein-coupled receptor 162	Cluster001
ENSG00000250571.7	206	No Class	GLI4	GLI family zinc finger 4	Cluster001
ENSG00000254685.6	138	No Class	FPGT	fucose-1-phosphate guanylyltransferase	Cluster001
ENSG00000256646.7	11	No Class	AC010132.3	novel PSMA2 and C7orf25 readthrough	Cluster001
ENSG00000261796.1	36	No Class	ISY1-RAB43	ISY1-RAB43 readthrough	Cluster001
ENSG00000261796.1.1	35	No Class	ISY1-RAB43	ISY1-RAB43 readthrough	Cluster001
ENSG00000262911.5	218	No Class	DNAJC28	DnaJ heat shock protein family (Hsp40) member C28	Cluster001
ENSG00000263001.6	21	No Class	GTF2I	general transcription factor IIi	Cluster001
ENSG00000264058.2	9	No Class	AC073508.2	novel transcript	Cluster001
ENSG00000267680.5	117	No Class	ZNF224	zinc finger protein 224	Cluster001
ENSG00000268350.7	46	No Class	FAM156A	family with sequence similarity 156 member A	Cluster001
ENSG00000269556.8	130	No Class	TMEM185A	transmembrane protein 185A	Cluster001
ENSG00000270441.1	9	No Class	AC135506.1	laminin. beta 1 (LAMB1) pseudogene	Cluster001
ENSG00000271601.4	178	No Class	LIX1L	limb and CNS expressed 1 like	Cluster001
ENSG00000271741.1	32	No Class	AC114490.2	novel transcript. ZMYM6-ZMYM6NB readthrough	Cluster001
ENSG00000273936.4	50	No Class	TNFRSF14	TNF receptor superfamily member 14	Cluster001
ENSG00000274070.2	2	No Class	CASTOR2	cytosolic arginine sensor for mTORC1 subunit 2	Cluster001
ENSG00000274349.4	34	No Class	ZNF658	zinc finger protein 658	Cluster001
ENSG00000274684.4	73	No Class	NMRAL1	NmrA like redox sensor 1	Cluster001
ENSG00000275074.2	101	No Class	NUDT18	nudix hydrolase 18	Cluster001
ENSG00000275111.5	6	No Class	ZNF2	zinc finger protein 2	Cluster001
ENSG00000275723.4	119	No Class	NAPEPLD	N-acyl phosphatidylethanolamine phospholipase D	Cluster001
ENSG00000276021.4	79	No Class	WDR81	WD repeat domain 81	Cluster001
ENSG00000276293.4	62	No Class	PIP4K2B	phosphatidylinositol-5-phosphate 4-kinase type 2 beta	Cluster001
ENSG00000276482.3	7	No Class	SLC12A7	solute carrier family 12 member 7	Cluster001
ENSG00000277053.4	14	No Class	GTF2IP1	general transcription factor IIi pseudogene 1	Cluster001
ENSG00000277072.5	98	No Class	STAG3L2	stromal antigen 3-like 2 (pseudogene)	Cluster001
ENSG00000277292.2	62	No Class	PIP4K2B	phosphatidylinositol-5-phosphate 4-kinase type 2 beta	Cluster001
ENSG00000278488.2	32	No Class	NAPRT	nicotinate phosphoribosyltransferase	Cluster001
ENSG00000279457.4	39	No Class	WASH9P	WAS protein family homolog 9. pseudogene	Cluster001
ENSG00000279457.4.1	45	No Class	WASH9P	WAS protein family homolog 9. pseudogene	Cluster001
ENSG00000280516.4	116	No Class	TMEM42	transmembrane protein 42	Cluster001
ENSG00000280663.4	15	No Class	PCMTD2	protein-L-isoaspartate (D-aspartate) O-methyltransferase domain containing 2	Cluster001
ENSG00000280789.2	108	No Class	PAGR1	PAXIP1 associated glutamate rich protein 1	Cluster001
ENSG00000281320.3	18	No Class	DYRK1B	dual specificity tyrosine phosphorylation regulated kinase 1B	Cluster001
ENSG00000281500.3	22	No Class	SLC37A4	solute carrier family 37 member 4	Cluster001
ENSG00000282130.1	96	No Class	NSMCE3	NSE3 homolog. SMC5-SMC6 complex component	Cluster001
ENSG00000283201.1	50	No Class	AC092329.3	zinc finger protein 724	Cluster001
ENSG00000283868.2	252	No Class	ZBTB4	zinc finger and BTB domain containing 4	Cluster001
ENSG00000284017.2	148	No Class	PLCL2	phospholipase C like 2	Cluster001
ENSG00000284228.2	5	No Class	TMEM102	transmembrane protein 102	Cluster001
ENSG00000284400.2	8	No Class	TBC1D9B	TBC1 domain family member 9B	Cluster001
ENSG00000284691.1	8	No Class	AC073111.4	novel zinc finger protein	Cluster001
ENSG00000285049.2	9	No Class	CPSF1	cleavage and polyadenylation specific factor 1	Cluster001
ENSG00000285193.1	30	No Class	RABGGTA	Rab geranylgeranyltransferase subunit alpha	Cluster001
ENSG00000285253.1	1	No Class	AC090517.4	zinc finger protein 280D	Cluster001
ENSG00000285390.2	16	No Class	ATP5IF1	ATP synthase inhibitory factor subunit 1	Cluster001
ENSG00000285451.2	50	No Class	ADCK5	aarF domain containing kinase 5	Cluster001
ENSG00000285920.2	197	No Class	AC087721.2	novel protein	Cluster001
ENSG00000288293.1	207	No Class	CC2D1A	coiled-coil and C2 domain containing 1A	Cluster001

## Sheet: Cluster 02
Name	Connections	Default Classes	Gene_ID	Gene_description	MCL_1.7_6
ENSG00000003096.14	19	No Class	KLHL13	kelch like family member 13	Cluster002
ENSG00000004139.14	91	No Class	SARM1	sterile alpha and TIR motif containing 1	Cluster002
ENSG00000005882.12	91	No Class	PDK2	pyruvate dehydrogenase kinase 2	Cluster002
ENSG00000007255.10	43	No Class	TRAPPC6A	trafficking protein particle complex 6A	Cluster002
ENSG00000010219.13	6	No Class	DYRK4	dual specificity tyrosine phosphorylation regulated kinase 4	Cluster002
ENSG00000015133.19	2	No Class	CCDC88C	coiled-coil domain containing 88C	Cluster002
ENSG00000019991.18	37	No Class	HGF	hepatocyte growth factor	Cluster002
ENSG00000022567.9	40	No Class	SLC45A4	solute carrier family 45 member 4	Cluster002
ENSG00000026950.17	49	No Class	BTN3A1	butyrophilin subfamily 3 member A1	Cluster002
ENSG00000030582.18	8	No Class	GRN	granulin precursor	Cluster002
ENSG00000032742.17	29	No Class	IFT88	intraflagellar transport 88	Cluster002
ENSG00000043143.20	42	No Class	JADE2	jade family PHD finger 2	Cluster002
ENSG00000049246.14	10	No Class	PER3	period circadian regulator 3	Cluster002
ENSG00000050767.17	2	No Class	COL23A1	collagen type XXIII alpha 1 chain	Cluster002
ENSG00000051128.19	21	No Class	HOMER3	homer scaffold protein 3	Cluster002
ENSG00000054983.17	164	No Class	GALC	galactosylceramidase	Cluster002
ENSG00000061938.19	124	No Class	TNK2	tyrosine kinase non receptor 2	Cluster002
ENSG00000064687.13	110	No Class	ABCA7	ATP binding cassette subfamily A member 7	Cluster002
ENSG00000067191.16	3	No Class	CACNB1	calcium voltage-gated channel auxiliary subunit beta 1	Cluster002
ENSG00000067992.15	51	No Class	PDK3	pyruvate dehydrogenase kinase 3	Cluster002
ENSG00000068137.15	51	No Class	PLEKHH3	pleckstrin homology. MyTH4 and FERM domain containing H3	Cluster002
ENSG00000068831.19	17	No Class	RASGRP2	RAS guanyl releasing protein 2	Cluster002
ENSG00000070081.17	61	No Class	NUCB2	nucleobindin 2	Cluster002
ENSG00000071073.13	34	No Class	MGAT4A	alpha-1.3-mannosyl-glycoprotein 4-beta-N-acetylglucosaminyltransferase A	Cluster002
ENSG00000071967.12	94	No Class	CYBRD1	cytochrome b reductase 1	Cluster002
ENSG00000072858.10	12	No Class	SIDT1	SID1 transmembrane family member 1	Cluster002
ENSG00000073060.16	4	No Class	SCARB1	scavenger receptor class B member 1	Cluster002
ENSG00000075240.17	187	No Class	GRAMD4	GRAM domain containing 4	Cluster002
ENSG00000075826.17	38	No Class	SEC31B	SEC31 homolog B. COPII coat complex component	Cluster002
ENSG00000076351.13	45	No Class	SLC46A1	solute carrier family 46 member 1	Cluster002
ENSG00000076555.15	33	No Class	ACACB	acetyl-CoA carboxylase beta	Cluster002
ENSG00000082014.16	30	No Class	SMARCD3	SWI/SNF related. matrix associated. actin dependent regulator of chromatin. subfamily d. member 3	Cluster002
ENSG00000082074.18	15	No Class	FYB1	FYN binding protein 1	Cluster002
ENSG00000082074.18.1	47	No Class	FYB1	FYN binding protein 1	Cluster002
ENSG00000082438.17	28	No Class	COBLL1	cordon-bleu WH2 repeat protein like 1	Cluster002
ENSG00000086289.12	9	No Class	EPDR1	ependymin related 1	Cluster002
ENSG00000087076.9	4	No Class	HSD17B14	hydroxysteroid 17-beta dehydrogenase 14	Cluster002
ENSG00000087301.9	40	No Class	TXNDC16	thioredoxin domain containing 16	Cluster002
ENSG00000087884.14	29	No Class	AAMDC	adipogenesis associated Mth938 domain containing	Cluster002
ENSG00000090316.16	49	No Class	MAEA	macrophage erythroblast attacher	Cluster002
ENSG00000090661.12	10	No Class	CERS4	ceramide synthase 4	Cluster002
ENSG00000092067.5	18	No Class	CEBPE	CCAAT enhancer binding protein epsilon	Cluster002
ENSG00000092529.25	1	No Class	CAPN3	calpain 3	Cluster002
ENSG00000093134.15	3	No Class	VNN3	vanin 3	Cluster002
ENSG00000095015.6	42	No Class	MAP3K1	mitogen-activated protein kinase kinase kinase 1	Cluster002
ENSG00000095370.20	15	No Class	SH2D3C	SH2 domain containing 3C	Cluster002
ENSG00000095585.16	115	No Class	BLNK	B cell linker	Cluster002
ENSG00000099330.9	85	No Class	OCEL1	occludin/ELL domain containing 1	Cluster002
ENSG00000100027.16	14	No Class	YPEL1	yippee like 1	Cluster002
ENSG00000100060.18	6	No Class	MFNG	MFNG O-fucosylpeptide 3-beta-N-acetylglucosaminyltransferase	Cluster002
ENSG00000100099.20	28	No Class	HPS4	HPS4 biogenesis of lysosomal organelles complex 3 subunit 2	Cluster002
ENSG00000100100.13	88	No Class	PIK3IP1	phosphoinositide-3-kinase interacting protein 1	Cluster002
ENSG00000100307.13	123	No Class	CBX7	chromobox 7	Cluster002
ENSG00000100350.14	113	No Class	FOXRED2	FAD dependent oxidoreductase domain containing 2	Cluster002
ENSG00000100365.16	33	No Class	NCF4	neutrophil cytosolic factor 4	Cluster002
ENSG00000100504.17	95	No Class	PYGL	glycogen phosphorylase L	Cluster002
ENSG00000100784.12	3	No Class	RPS6KA5	ribosomal protein S6 kinase A5	Cluster002
ENSG00000101213.7	59	No Class	PTK6	protein tyrosine kinase 6	Cluster002
ENSG00000101220.17	1	No Class	C20orf27	chromosome 20 open reading frame 27	Cluster002
ENSG00000101400.6	1	No Class	SNTA1	syntrophin alpha 1	Cluster002
ENSG00000101695.9	32	No Class	RNF125	ring finger protein 125	Cluster002
ENSG00000101955.15	9	No Class	SRPX	sushi repeat containing protein X-linked	Cluster002
ENSG00000102032.13	27	No Class	RENBP	renin binding protein	Cluster002
ENSG00000102878.16	7	No Class	HSF4	heat shock transcription factor 4	Cluster002
ENSG00000102882.12	146	No Class	MAPK3	mitogen-activated protein kinase 3	Cluster002
ENSG00000102984.15	89	No Class	ZNF821	zinc finger protein 821	Cluster002
ENSG00000103313.12	27	No Class	MEFV	MEFV innate immuity regulator. pyrin	Cluster002
ENSG00000103485.19	44	No Class	QPRT	quinolinate phosphoribosyltransferase	Cluster002
ENSG00000103550.14	49	No Class	KNOP1	lysine rich nucleolar protein 1	Cluster002
ENSG00000104814.13	28	No Class	MAP4K1	mitogen-activated protein kinase kinase kinase kinase 1	Cluster002
ENSG00000104883.8	109	No Class	PEX11G	peroxisomal biogenesis factor 11 gamma	Cluster002
ENSG00000104894.12	50	No Class	CD37	CD37 molecule	Cluster002
ENSG00000104915.15	54	No Class	STX10	syntaxin 10	Cluster002
ENSG00000105204.14	3	No Class	DYRK1B	dual specificity tyrosine phosphorylation regulated kinase 1B	Cluster002
ENSG00000105339.10	64	No Class	DENND3	DENN domain containing 3	Cluster002
ENSG00000105612.9	34	No Class	DNASE2	deoxyribonuclease 2. lysosomal	Cluster002
ENSG00000106268.15	44	No Class	NUDT1	nudix hydrolase 1	Cluster002
ENSG00000106415.13	45	No Class	GLCCI1	glucocorticoid induced 1	Cluster002
ENSG00000106560.11	16	No Class	GIMAP2	GTPase. IMAP family member 2	Cluster002
ENSG00000106976.20	1	No Class	DNM1	dynamin 1	Cluster002
ENSG00000107282.8	80	No Class	APBA1	amyloid beta precursor protein binding family A member 1	Cluster002
ENSG00000107957.16	31	No Class	SH3PXD2A	SH3 and PX domains 2A	Cluster002
ENSG00000108468.15	174	No Class	CBX1	chromobox 1	Cluster002
ENSG00000109062.12	43	No Class	SLC9A3R1	SLC9A3 regulator 1	Cluster002
ENSG00000109062.12.1	43	No Class	SLC9A3R1	SLC9A3 regulator 1	Cluster002
ENSG00000109089.7	2	No Class	CDR2L	cerebellar degeneration related protein 2 like	Cluster002
ENSG00000109667.12	49	No Class	SLC2A9	solute carrier family 2 member 9	Cluster002
ENSG00000109743.11	61	No Class	BST1	bone marrow stromal cell antigen 1	Cluster002
ENSG00000110077.14	21	No Class	MS4A6A	membrane spanning 4-domains A6A	Cluster002
ENSG00000110079.18	1	No Class	MS4A4A	membrane spanning 4-domains A4A	Cluster002
ENSG00000110455.14	188	No Class	ACCS	1-aminocyclopropane-1-carboxylate synthase homolog (inactive)	Cluster002
ENSG00000110876.9	1	No Class	SELPLG	selectin P ligand	Cluster002
ENSG00000111247.14	26	No Class	RAD51AP1	RAD51 associated protein 1	Cluster002
ENSG00000111275.13	13	No Class	ALDH2	aldehyde dehydrogenase 2 family member	Cluster002
ENSG00000111653.20	82	No Class	ING4	inhibitor of growth family member 4	Cluster002
ENSG00000111801.16	6	No Class	BTN3A3	butyrophilin subfamily 3 member A3	Cluster002
ENSG00000112773.16	118	No Class	TENT5A	terminal nucleotidyltransferase 5A	Cluster002
ENSG00000113140.11	9	No Class	SPARC	secreted protein acidic and cysteine rich	Cluster002
ENSG00000113504.21	36	No Class	SLC12A7	solute carrier family 12 member 7	Cluster002
ENSG00000114115.10	7	No Class	RBP1	retinol binding protein 1	Cluster002
ENSG00000114473.14	8	No Class	IQCG	IQ motif containing G	Cluster002
ENSG00000114770.17	97	No Class	ABCC5	ATP binding cassette subfamily C member 5	Cluster002
ENSG00000114841.17	64	No Class	DNAH1	dynein axonemal heavy chain 1	Cluster002
ENSG00000115318.12	122	No Class	LOXL3	lysyl oxidase like 3	Cluster002
ENSG00000116005.12	196	No Class	PCYOX1	prenylcysteine oxidase 1	Cluster002
ENSG00000116791.14	26	No Class	CRYZ	crystallin zeta	Cluster002
ENSG00000116857.17	90	No Class	TMEM9	transmembrane protein 9	Cluster002
ENSG00000116985.12	5	No Class	BMP8B	bone morphogenetic protein 8b	Cluster002
ENSG00000116990.11	7	No Class	MYCL	MYCL proto-oncogene. bHLH transcription factor	Cluster002
ENSG00000117480.16	16	No Class	FAAH	fatty acid amide hydrolase	Cluster002
ENSG00000117632.23	35	No Class	STMN1	stathmin 1	Cluster002
ENSG00000118308.15	38	No Class	LRMP	lymphoid restricted membrane protein	Cluster002
ENSG00000118855.21	28	No Class	MFSD1	major facilitator superfamily domain containing 1	Cluster002
ENSG00000119401.10	93	No Class	TRIM32	tripartite motif containing 32	Cluster002
ENSG00000119711.13	58	No Class	ALDH6A1	aldehyde dehydrogenase 6 family member A1	Cluster002
ENSG00000119865.9	26	No Class	CNRIP1	cannabinoid receptor interacting protein 1	Cluster002
ENSG00000119950.21	69	No Class	MXI1	MAX interactor 1. dimerization protein	Cluster002
ENSG00000120049.19	3	No Class	KCNIP2	potassium voltage-gated channel interacting protein 2	Cluster002
ENSG00000120256.11	34	No Class	LRP11	LDL receptor related protein 11	Cluster002
ENSG00000120341.18	31	No Class	SEC16B	SEC16 homolog B. endoplasmic reticulum export factor	Cluster002
ENSG00000120457.12	18	No Class	KCNJ5	potassium inwardly rectifying channel subfamily J member 5	Cluster002
ENSG00000120696.9	81	No Class	KBTBD7	kelch repeat and BTB domain containing 7	Cluster002
ENSG00000120756.13	2	No Class	PLS1	plastin 1	Cluster002
ENSG00000120949.15	50	No Class	TNFRSF8	TNF receptor superfamily member 8	Cluster002
ENSG00000120949.15.1	47	No Class	TNFRSF8	TNF receptor superfamily member 8	Cluster002
ENSG00000121210.16	7	No Class	TMEM131L	transmembrane 131 like	Cluster002
ENSG00000121310.17	18	No Class	ECHDC2	enoyl-CoA hydratase domain containing 2	Cluster002
ENSG00000121858.11	8	No Class	TNFSF10	TNF superfamily member 10	Cluster002
ENSG00000121858.11.1	8	No Class	TNFSF10	TNF superfamily member 10	Cluster002
ENSG00000122122.10	38	No Class	SASH3	SAM and SH3 domain containing 3	Cluster002
ENSG00000122254.7	16	No Class	HS3ST2	heparan sulfate-glucosamine 3-sulfotransferase 2	Cluster002
ENSG00000122986.13	107	No Class	HVCN1	hydrogen voltage gated channel 1	Cluster002
ENSG00000123080.12	21	No Class	CDKN2C	cyclin dependent kinase inhibitor 2C	Cluster002
ENSG00000123124.14	52	No Class	WWP1	WW domain containing E3 ubiquitin protein ligase 1	Cluster002
ENSG00000123329.19	91	No Class	ARHGAP9	Rho GTPase activating protein 9	Cluster002
ENSG00000123384.14	112	No Class	LRP1	LDL receptor related protein 1	Cluster002
ENSG00000123836.15	191	No Class	PFKFB2	6-phosphofructo-2-kinase/fructose-2.6-biphosphatase 2	Cluster002
ENSG00000123933.17	73	No Class	MXD4	MAX dimerization protein 4	Cluster002
ENSG00000124104.19	99	No Class	SNX21	sorting nexin family member 21	Cluster002
ENSG00000124508.17	77	No Class	BTN2A2	butyrophilin subfamily 2 member A2	Cluster002
ENSG00000125457.14	168	No Class	MIF4GD	MIF4G domain containing	Cluster002
ENSG00000125510.18	44	No Class	OPRL1	opioid related nociceptin receptor 1	Cluster002
ENSG00000125520.14	43	No Class	SLC2A4RG	SLC2A4 regulator	Cluster002
ENSG00000125703.15	113	No Class	ATG4C	autophagy related 4C cysteine peptidase	Cluster002
ENSG00000126860.11	122	No Class	EVI2A	ecotropic viral integration site 2A	Cluster002
ENSG00000127511.9	64	No Class	SIN3B	SIN3 transcription regulator family member B	Cluster002
ENSG00000128185.10	59	No Class	DGCR6L	DiGeorge syndrome critical region gene 6 like	Cluster002
ENSG00000128739.22	53	No Class	SNRPN	small nuclear ribonucleoprotein polypeptide N	Cluster002
ENSG00000128886.12	29	No Class	ELL3	elongation factor for RNA polymerase II 3	Cluster002
ENSG00000129007.14	112	No Class	CALML4	calmodulin like 4	Cluster002
ENSG00000129675.16	180	No Class	ARHGEF6	Rac/Cdc42 guanine nucleotide exchange factor 6	Cluster002
ENSG00000130653.16	100	No Class	PNPLA7	patatin like phospholipase domain containing 7	Cluster002
ENSG00000131018.24	31	No Class	SYNE1	spectrin repeat containing nuclear envelope protein 1	Cluster002
ENSG00000132359.15	45	No Class	AC002316.1	RAP1 GTPase activating protein 2	Cluster002
ENSG00000132589.16	5	No Class	FLOT2	flotillin 2	Cluster002
ENSG00000133121.21	83	No Class	STARD13	StAR related lipid transfer domain containing 13	Cluster002
ENSG00000133246.12	18	No Class	PRAM1	PML-RARA regulated adaptor molecule 1	Cluster002
ENSG00000133246.12.1	18	No Class	PRAM1	PML-RARA regulated adaptor molecule 1	Cluster002
ENSG00000133256.12	47	No Class	PDE6B	phosphodiesterase 6B	Cluster002
ENSG00000133619.17	11	No Class	KRBA1	KRAB-A domain containing 1	Cluster002
ENSG00000133935.7	1	No Class	ERG28	ergosterol biosynthesis 28 homolog	Cluster002
ENSG00000133943.20	73	No Class	DGLUCY	D-glutamate cyclase	Cluster002
ENSG00000134245.18	7	No Class	WNT2B	Wnt family member 2B	Cluster002
ENSG00000134247.10	27	No Class	PTGFRN	prostaglandin F2 receptor inhibitor	Cluster002
ENSG00000134516.17	76	No Class	DOCK2	dedicator of cytokinesis 2	Cluster002
ENSG00000134955.11	35	No Class	SLC37A2	solute carrier family 37 member 2	Cluster002
ENSG00000134986.14	41	No Class	NREP	neuronal regeneration related protein	Cluster002
ENSG00000135362.14	14	No Class	PRR5L	proline rich 5 like	Cluster002
ENSG00000135596.18	20	No Class	MICAL1	microtubule associated monooxygenase. calponin and LIM domain containing 1	Cluster002
ENSG00000135838.13	39	No Class	NPL	N-acetylneuraminate pyruvate lyase	Cluster002
ENSG00000136040.9	49	No Class	PLXNC1	plexin C1	Cluster002
ENSG00000136044.12	197	No Class	APPL2	adaptor protein. phosphotyrosine interacting with PH domain and leucine zipper 2	Cluster002
ENSG00000136108.15	68	No Class	CKAP2	cytoskeleton associated protein 2	Cluster002
ENSG00000136156.15	81	No Class	ITM2B	integral membrane protein 2B	Cluster002
ENSG00000136305.11	70	No Class	CIDEB	cell death inducing DFFA like effector b	Cluster002
ENSG00000136514.3	9	No Class	RTP4	receptor transporter protein 4	Cluster002
ENSG00000136856.18	54	No Class	SLC2A8	solute carrier family 2 member 8	Cluster002
ENSG00000137070.17	68	No Class	IL11RA	interleukin 11 receptor subunit alpha	Cluster002
ENSG00000137338.5	3	No Class	PGBD1	piggyBac transposable element derived 1	Cluster002
ENSG00000137700.18	31	No Class	SLC37A4	solute carrier family 37 member 4	Cluster002
ENSG00000137841.12	67	No Class	PLCB2	phospholipase C beta 2	Cluster002
ENSG00000138439.12	88	No Class	FAM117B	family with sequence similarity 117 member B	Cluster002
ENSG00000138449.10	32	No Class	SLC40A1	solute carrier family 40 member 1	Cluster002
ENSG00000138744.16	190	No Class	NAAA	N-acylethanolamine acid amidase	Cluster002
ENSG00000138764.15	147	No Class	CCNG2	cyclin G2	Cluster002
ENSG00000138796.16	3	No Class	HADH	hydroxyacyl-CoA dehydrogenase	Cluster002
ENSG00000139508.14	117	No Class	SLC46A3	solute carrier family 46 member 3	Cluster002
ENSG00000139668.9	2	No Class	WDFY2	WD repeat and FYVE domain containing 2	Cluster002
ENSG00000139679.15	23	No Class	LPAR6	lysophosphatidic acid receptor 6	Cluster002
ENSG00000141447.18	59	No Class	OSBPL1A	oxysterol binding protein like 1A	Cluster002
ENSG00000141480.18	82	No Class	ARRB2	arrestin beta 2	Cluster002
ENSG00000141505.12	65	No Class	ASGR1	asialoglycoprotein receptor 1	Cluster002
ENSG00000141698.17	37	No Class	NT5C3B	5 -nucleotidase. cytosolic IIIB	Cluster002
ENSG00000142102.16	36	No Class	PGGHG	protein-glucosylgalactosylhydroxylysine glucosidase	Cluster002
ENSG00000142188.17	118	No Class	TMEM50B	transmembrane protein 50B	Cluster002
ENSG00000142494.13	60	No Class	SLC47A1	solute carrier family 47 member 1	Cluster002
ENSG00000142583.18	11	No Class	SLC2A5	solute carrier family 2 member 5	Cluster002
ENSG00000143797.12	7	No Class	MBOAT2	membrane bound O-acyltransferase domain containing 2	Cluster002
ENSG00000144199.11	52	No Class	FAHD2B	fumarylacetoacetate hydrolase domain containing 2B	Cluster002
ENSG00000145569.6	12	No Class	OTULINL	OTU deubiquitinase with linear linkage specificity like	Cluster002
ENSG00000145703.16	13	No Class	IQGAP2	IQ motif containing GTPase activating protein 2	Cluster002
ENSG00000145945.7	18	No Class	FAM50B	family with sequence similarity 50 member B	Cluster002
ENSG00000145949.11	75	No Class	MYLK4	myosin light chain kinase family member 4	Cluster002
ENSG00000146192.15	94	No Class	FGD2	FYVE. RhoGEF and PH domain containing 2	Cluster002
ENSG00000146409.12	43	No Class	SLC18B1	solute carrier family 18 member B1	Cluster002
ENSG00000147576.17	29	No Class	ADHFE1	alcohol dehydrogenase iron containing 1	Cluster002
ENSG00000147813.16	23	No Class	NAPRT	nicotinate phosphoribosyltransferase	Cluster002
ENSG00000148218.16	10	No Class	ALAD	aminolevulinate dehydratase	Cluster002
ENSG00000148450.13	9	No Class	MSRB2	methionine sulfoxide reductase B2	Cluster002
ENSG00000148660.20	186	No Class	CAMK2G	calcium/calmodulin dependent protein kinase II gamma	Cluster002
ENSG00000148700.15	74	No Class	ADD3	adducin 3	Cluster002
ENSG00000149212.12	8	No Class	SESN3	sestrin 3	Cluster002
ENSG00000149260.18	77	No Class	CAPN5	calpain 5	Cluster002
ENSG00000149269.9	151	No Class	PAK1	p21 (RAC1) activated kinase 1	Cluster002
ENSG00000149577.16	134	No Class	SIDT2	SID1 transmembrane family member 2	Cluster002
ENSG00000149591.17	20	No Class	TAGLN	transgelin	Cluster002
ENSG00000150681.10	18	No Class	RGS18	regulator of G protein signaling 18	Cluster002
ENSG00000151117.9	77	No Class	TMEM86A	transmembrane protein 86A	Cluster002
ENSG00000151623.15	22	No Class	NR3C2	nuclear receptor subfamily 3 group C member 2	Cluster002
ENSG00000151702.17	283	No Class	FLI1	Fli-1 proto-oncogene. ETS transcription factor	Cluster002
ENSG00000152582.14	3	No Class	SPEF2	sperm flagellar 2	Cluster002
ENSG00000152804.11	64	No Class	HHEX	hematopoietically expressed homeobox	Cluster002
ENSG00000152818.18	24	No Class	UTRN	utrophin	Cluster002
ENSG00000153551.14	60	No Class	CMTM7	CKLF like MARVEL transmembrane domain containing 7	Cluster002
ENSG00000153551.14.1	60	No Class	CMTM7	CKLF like MARVEL transmembrane domain containing 7	Cluster002
ENSG00000153814.13	4	No Class	JAZF1	JAZF zinc finger 1	Cluster002
ENSG00000153902.14	1	No Class	LGI4	leucine rich repeat LGI family member 4	Cluster002
ENSG00000153936.17	9	No Class	HS2ST1	heparan sulfate 2-O-sulfotransferase 1	Cluster002
ENSG00000154760.14	42	No Class	SLFN13	schlafen family member 13	Cluster002
ENSG00000154889.17	47	No Class	MPPE1	metallophosphoesterase 1	Cluster002
ENSG00000154930.15	20	No Class	ACSS1	acyl-CoA synthetase short chain family member 1	Cluster002
ENSG00000155016.18	17	No Class	CYP2U1	cytochrome P450 family 2 subfamily U member 1	Cluster002
ENSG00000155719.17	11	No Class	OTOA	otoancorin	Cluster002
ENSG00000155792.10	75	No Class	DEPTOR	DEP domain containing MTOR interacting protein	Cluster002
ENSG00000156050.10	65	No Class	FAM161B	FAM161 centrosomal protein B	Cluster002
ENSG00000156171.14	26	No Class	DRAM2	DNA damage regulated autophagy modulator 2	Cluster002
ENSG00000157045.9	5	No Class	NTAN1	N-terminal asparagine amidase	Cluster002
ENSG00000157107.14	81	No Class	FCHO2	FCH and mu domain containing endocytic adaptor 2	Cluster002
ENSG00000157593.19	62	No Class	SLC35B2	solute carrier family 35 member B2	Cluster002
ENSG00000157693.15	40	No Class	TMEM268	transmembrane protein 268	Cluster002
ENSG00000158062.20	58	No Class	UBXN11	UBX domain protein 11	Cluster002
ENSG00000158717.11	33	No Class	RNF166	ring finger protein 166	Cluster002
ENSG00000158825.6	12	No Class	CDA	cytidine deaminase	Cluster002
ENSG00000159374.17	44	No Class	M1AP	meiosis 1 associated protein	Cluster002
ENSG00000160219.12	54	No Class	GAB3	GRB2 associated binding protein 3	Cluster002
ENSG00000160593.19	70	No Class	JAML	junction adhesion molecule like	Cluster002
ENSG00000162066.15	68	No Class	AMDHD2	amidohydrolase domain containing 2	Cluster002
ENSG00000162174.12	65	No Class	ASRGL1	asparaginase and isoaspartyl peptidase 1	Cluster002
ENSG00000162444.12	17	No Class	RBP7	retinol binding protein 7	Cluster002
ENSG00000162458.13	6	No Class	FBLIM1	filamin binding LIM protein 1	Cluster002
ENSG00000162591.16	56	No Class	MEGF6	multiple EGF like domains 6	Cluster002
ENSG00000162599.17	7	No Class	NFIA	nuclear factor I A	Cluster002
ENSG00000162714.12	69	No Class	ZNF496	zinc finger protein 496	Cluster002
ENSG00000162869.16	207	No Class	PPP1R21	protein phosphatase 1 regulatory subunit 21	Cluster002
ENSG00000162946.22	21	No Class	DISC1	DISC1 scaffold protein	Cluster002
ENSG00000163219.12	9	No Class	ARHGAP25	Rho GTPase activating protein 25	Cluster002
ENSG00000163328.13	19	No Class	GPR155	G protein-coupled receptor 155	Cluster002
ENSG00000163346.17	66	No Class	PBXIP1	PBX homeobox interacting protein 1	Cluster002
ENSG00000163513.19	180	No Class	TGFBR2	transforming growth factor beta receptor 2	Cluster002
ENSG00000163617.11	22	No Class	CCDC191	coiled-coil domain containing 191	Cluster002
ENSG00000163818.17	77	No Class	LZTFL1	leucine zipper transcription factor like 1	Cluster002
ENSG00000163945.18	45	No Class	UVSSA	UV stimulated scaffold protein A	Cluster002
ENSG00000164985.15	80	No Class	PSIP1	PC4 and SFRS1 interacting protein 1	Cluster002
ENSG00000165424.7	137	No Class	ZCCHC24	zinc finger CCHC-type containing 24	Cluster002
ENSG00000165698.16	6	No Class	SPACA9	sperm acrosome associated 9	Cluster002
ENSG00000165879.9	2	No Class	FRAT1	FRAT regulator of WNT signaling pathway 1	Cluster002
ENSG00000166432.15	35	No Class	ZMAT1	zinc finger matrin-type 1	Cluster002
ENSG00000166866.13	3	No Class	MYO1A	myosin IA	Cluster002
ENSG00000166979.13	7	No Class	EVA1C	eva-1 homolog C	Cluster002
ENSG00000166997.8	16	No Class	CNPY4	canopy FGF signaling regulator 4	Cluster002
ENSG00000167107.12	1	No Class	ACSF2	acyl-CoA synthetase family member 2	Cluster002
ENSG00000167191.12	27	No Class	GPRC5B	G protein-coupled receptor class C group 5 member B	Cluster002
ENSG00000167261.14	5	No Class	DPEP2	dipeptidase 2	Cluster002
ENSG00000167363.14	58	No Class	FN3K	fructosamine 3 kinase	Cluster002
ENSG00000167552.14	5	No Class	TUBA1A	tubulin alpha 1a	Cluster002
ENSG00000167642.13	55	No Class	SPINT2	serine peptidase inhibitor. Kunitz type 2	Cluster002
ENSG00000167895.15	5	No Class	TMC8	transmembrane channel like 8	Cluster002
ENSG00000167925.16	164	No Class	GHDC	GH3 domain containing	Cluster002
ENSG00000168405.17	31	No Class	CMAHP	cytidine monophospho-N-acetylneuraminic acid hydroxylase. pseudogene	Cluster002
ENSG00000168476.12	90	No Class	REEP4	receptor accessory protein 4	Cluster002
ENSG00000168517.10	67	No Class	HEXIM2	HEXIM P-TEFb complex subunit 2	Cluster002
ENSG00000168918.14	59	No Class	INPP5D	inositol polyphosphate-5-phosphatase D	Cluster002
ENSG00000169105.7	154	No Class	CHST14	carbohydrate sulfotransferase 14	Cluster002
ENSG00000169220.18	61	No Class	RGS14	regulator of G protein signaling 14	Cluster002
ENSG00000169255.15	10	No Class	B3GALNT1	beta-1.3-N-acetylgalactosaminyltransferase 1 (globoside blood group)	Cluster002
ENSG00000169413.3	56	No Class	RNASE6	ribonuclease A family member k6	Cluster002
ENSG00000169660.16	301	No Class	HEXD	hexosaminidase D	Cluster002
ENSG00000169891.18	58	No Class	REPS2	RALBP1 associated Eps domain containing 2	Cluster002
ENSG00000169891.18.1	58	No Class	REPS2	RALBP1 associated Eps domain containing 2	Cluster002
ENSG00000170275.15	185	No Class	CRTAP	cartilage associated protein	Cluster002
ENSG00000170915.9	76	No Class	PAQR8	progestin and adipoQ receptor family member 8	Cluster002
ENSG00000171094.18	1	No Class	ALK	ALK receptor tyrosine kinase	Cluster002
ENSG00000171298.13	142	No Class	GAA	glucosidase alpha. acid	Cluster002
ENSG00000171608.16	16	No Class	PIK3CD	phosphatidylinositol-4.5-bisphosphate 3-kinase catalytic subunit delta	Cluster002
ENSG00000171777.16	158	No Class	RASGRP4	RAS guanyl releasing protein 4	Cluster002
ENSG00000171840.12	61	No Class	NINJ2	ninjurin 2	Cluster002
ENSG00000172123.12	65	No Class	SLFN12	schlafen family member 12	Cluster002
ENSG00000172197.11	56	No Class	MBOAT1	membrane bound O-acyltransferase domain containing 1	Cluster002
ENSG00000172716.16	91	No Class	SLFN11	schlafen family member 11	Cluster002
ENSG00000172794.20	21	No Class	RAB37	RAB37. member RAS oncogene family	Cluster002
ENSG00000172828.13	2	No Class	CES3	carboxylesterase 3	Cluster002
ENSG00000173083.15	6	No Class	HPSE	heparanase	Cluster002
ENSG00000173198.6	27	No Class	CYSLTR1	cysteinyl leukotriene receptor 1	Cluster002
ENSG00000173218.15	3	No Class	VANGL1	VANGL planar cell polarity protein 1	Cluster002
ENSG00000173275.13	118	No Class	ZNF449	zinc finger protein 449	Cluster002
ENSG00000173581.8	127	No Class	CCDC106	coiled-coil domain containing 106	Cluster002
ENSG00000173801.17	40	No Class	JUP	junction plakoglobin	Cluster002
ENSG00000174080.11	46	No Class	CTSF	cathepsin F	Cluster002
ENSG00000174428.18	27	No Class	GTF2IRD2B	GTF2I repeat domain containing 2B	Cluster002
ENSG00000174428.18.1	27	No Class	GTF2IRD2B	GTF2I repeat domain containing 2B	Cluster002
ENSG00000174456.14	180	No Class	C12orf76	chromosome 12 open reading frame 76	Cluster002
ENSG00000174628.16	48	No Class	IQCK	IQ motif containing K	Cluster002
ENSG00000175155.10	74	No Class	YPEL2	yippee like 2	Cluster002
ENSG00000175262.14	52	No Class	C1orf127	chromosome 1 open reading frame 127	Cluster002
ENSG00000175287.19	25	No Class	PHYHD1	phytanoyl-CoA dioxygenase domain containing 1	Cluster002
ENSG00000175489.10	74	No Class	LRRC25	leucine rich repeat containing 25	Cluster002
ENSG00000177732.8	46	No Class	SOX12	SRY-box transcription factor 12	Cluster002
ENSG00000178573.7	44	No Class	MAF	MAF bZIP transcription factor	Cluster002
ENSG00000178585.15	69	No Class	CTNNBIP1	catenin beta interacting protein 1	Cluster002
ENSG00000178718.6	30	No Class	RPP25	ribonuclease P and MRP subunit p25	Cluster002
ENSG00000178809.11	15	No Class	TRIM73	tripartite motif containing 73	Cluster002
ENSG00000178935.5	16	No Class	ZNF552	zinc finger protein 552	Cluster002
ENSG00000179029.15	154	No Class	TMEM107	transmembrane protein 107	Cluster002
ENSG00000179057.13	13	No Class	IGSF22	immunoglobulin superfamily member 22	Cluster002
ENSG00000179144.5	35	No Class	GIMAP7	GTPase. IMAP family member 7	Cluster002
ENSG00000179583.19	135	No Class	CIITA	class II major histocompatibility complex transactivator	Cluster002
ENSG00000179981.10	38	No Class	TSHZ1	teashirt zinc finger homeobox 1	Cluster002
ENSG00000180340.7	72	No Class	FZD2	frizzled class receptor 2	Cluster002
ENSG00000180964.17	61	No Class	TCEAL8	transcription elongation factor A like 8	Cluster002
ENSG00000181444.13	51	No Class	ZNF467	zinc finger protein 467	Cluster002
ENSG00000181513.14	302	No Class	ACBD4	acyl-CoA binding domain containing 4	Cluster002
ENSG00000181523.13	122	No Class	SGSH	N-sulfoglucosamine sulfohydrolase	Cluster002
ENSG00000181982.18	21	No Class	CCDC149	coiled-coil domain containing 149	Cluster002
ENSG00000182054.9	49	No Class	IDH2	isocitrate dehydrogenase (NADP(+)) 2	Cluster002
ENSG00000182134.16	73	No Class	TDRKH	tudor and KH domain containing	Cluster002
ENSG00000182162.11	66	No Class	P2RY8	P2Y receptor family member 8	Cluster002
ENSG00000182240.16	2	No Class	BACE2	beta-secretase 2	Cluster002
ENSG00000182511.12	172	No Class	FES	FES proto-oncogene. tyrosine kinase	Cluster002
ENSG00000182749.5	72	No Class	PAQR7	progestin and adipoQ receptor family member 7	Cluster002
ENSG00000183020.13	35	No Class	AP2A2	adaptor related protein complex 2 subunit alpha 2	Cluster002
ENSG00000183048.12	49	No Class	SLC25A10	solute carrier family 25 member 10	Cluster002
ENSG00000183049.12	92	No Class	CAMK1D	calcium/calmodulin dependent protein kinase ID	Cluster002
ENSG00000183628.14	2	No Class	DGCR6	DiGeorge syndrome critical region gene 6	Cluster002
ENSG00000183734.4	4	No Class	ASCL2	achaete-scute family bHLH transcription factor 2	Cluster002
ENSG00000183828.15	5	No Class	NUDT14	nudix hydrolase 14	Cluster002
ENSG00000184154.14	5	No Class	LRTOMT	leucine rich transmembrane and O-methyltransferase domain containing	Cluster002
ENSG00000184916.9	5	No Class	JAG2	jagged canonical Notch ligand 2	Cluster002
ENSG00000185187.13	40	No Class	SIGIRR	single Ig and TIR domain containing	Cluster002
ENSG00000185215.9	28	No Class	TNFAIP2	TNF alpha induced protein 2	Cluster002
ENSG00000185215.9.1	30	No Class	TNFAIP2	TNF alpha induced protein 2	Cluster002
ENSG00000185339.9	7	No Class	TCN2	transcobalamin 2	Cluster002
ENSG00000185432.12	101	No Class	METTL7A	methyltransferase like 7A	Cluster002
ENSG00000186451.2	12	No Class	SPATA12	spermatogenesis associated 12	Cluster002
ENSG00000186469.8	19	No Class	GNG2	G protein subunit gamma 2	Cluster002
ENSG00000186862.20	2	No Class	PDZD7	PDZ domain containing 7	Cluster002
ENSG00000187266.14	34	No Class	EPOR	erythropoietin receptor	Cluster002
ENSG00000187554.14	74	No Class	TLR5	toll like receptor 5	Cluster002
ENSG00000187808.5	12	No Class	SOWAHD	sosondowah ankyrin repeat domain family member D	Cluster002
ENSG00000188158.15	20	No Class	NHS	NHS actin remodeling regulator	Cluster002
ENSG00000188305.6	62	No Class	PEAK3	PEAK family member 3	Cluster002
ENSG00000188549.12	29	No Class	CCDC9B	coiled-coil domain containing 9B	Cluster002
ENSG00000188747.8	24	No Class	NOXA1	NADPH oxidase activator 1	Cluster002
ENSG00000188878.19	9	No Class	FBF1	Fas binding factor 1	Cluster002
ENSG00000188906.16	69	No Class	LRRK2	leucine rich repeat kinase 2	Cluster002
ENSG00000188921.14	9	No Class	HACD4	3-hydroxyacyl-CoA dehydratase 4	Cluster002
ENSG00000196209.13	52	No Class	SIRPB2	signal regulatory protein beta 2	Cluster002
ENSG00000196275.14	33	No Class	GTF2IRD2	GTF2I repeat domain containing 2	Cluster002
ENSG00000196275.14.1	33	No Class	GTF2IRD2	GTF2I repeat domain containing 2	Cluster002
ENSG00000196369.11	16	No Class	SRGAP2B	SLIT-ROBO Rho GTPase activating protein 2B	Cluster002
ENSG00000196476.12	85	No Class	C20orf96	chromosome 20 open reading frame 96	Cluster002
ENSG00000196664.5	31	No Class	TLR7	toll like receptor 7	Cluster002
ENSG00000197816.15	17	No Class	CCDC180	coiled-coil domain containing 180	Cluster002
ENSG00000198464.14	26	No Class	ZNF480	zinc finger protein 480	Cluster002
ENSG00000198785.7	115	No Class	GRIN3A	glutamate ionotropic receptor NMDA type subunit 3A	Cluster002
ENSG00000198794.12	37	No Class	SCAMP5	secretory carrier membrane protein 5	Cluster002
ENSG00000198816.7	39	No Class	ZNF358	zinc finger protein 358	Cluster002
ENSG00000198832.10	2	No Class	SELENOM	selenoprotein M	Cluster002
ENSG00000198865.10	7	No Class	CCDC152	coiled-coil domain containing 152	Cluster002
ENSG00000198885.9	9	No Class	ITPRIPL1	ITPRIP like 1	Cluster002
ENSG00000204131.9	19	No Class	NHSL2	NHS like 2	Cluster002
ENSG00000204131.9.1	44	No Class	NHSL2	NHS like 2	Cluster002
ENSG00000205269.6	101	No Class	TMEM170B	transmembrane protein 170B	Cluster002
ENSG00000213366.13	6	No Class	GSTM2	glutathione S-transferase mu 2	Cluster002
ENSG00000213809.9	10	No Class	KLRK1	killer cell lectin like receptor K1	Cluster002
ENSG00000213876.4	65	No Class	RPL7AP64	ribosomal protein L7a pseudogene 64	Cluster002
ENSG00000213903.9	10	No Class	LTB4R	leukotriene B4 receptor	Cluster002
ENSG00000214826.5	10	No Class	DDX12P	DEAD/H-box helicase 12. pseudogene	Cluster002
ENSG00000215105.4	39	No Class	TTC3P1	tetratricopeptide repeat domain 3 pseudogene 1	Cluster002
ENSG00000216490.4	5	No Class	IFI30	IFI30 lysosomal thiol reductase	Cluster002
ENSG00000219481.10	111	No Class	NBPF1	NBPF member 1	Cluster002
ENSG00000220008.3	33	No Class	LINGO3	leucine rich repeat and Ig domain containing 3	Cluster002
ENSG00000226264.10	73	No Class	HLA-DMB	major histocompatibility complex. class II. DM beta	Cluster002
ENSG00000226287.8	1	No Class	TMEM191A	transmembrane protein 191A (pseudogene)	Cluster002
ENSG00000229417.1	10	No Class	NPM1P25	nucleophosmin 1 pseudogene 25	Cluster002
ENSG00000231584.8	29	No Class	FAHD2CP	fumarylacetoacetate hydrolase domain containing 2C. pseudogene	Cluster002
ENSG00000233198.3	14	No Class	RNF224	ring finger protein 224	Cluster002
ENSG00000235194.9	89	No Class	PPP1R3E	protein phosphatase 1 regulatory subunit 3E	Cluster002
ENSG00000235568.7	46	No Class	NFAM1	NFAT activating protein with ITAM motif 1	Cluster002
ENSG00000235944.8	83	No Class	ZNF815P	zinc finger protein 815. pseudogene	Cluster002
ENSG00000235961.5	26	No Class	PNMA6A	PNMA family member 6A	Cluster002
ENSG00000239329.8	47	No Class	HLA-DMB	major histocompatibility complex. class II. DM beta	Cluster002
ENSG00000241399.7	15	No Class	CD302	CD302 molecule	Cluster002
ENSG00000241674.8	15	No Class	HLA-DMB	major histocompatibility complex. class II. DM beta	Cluster002
ENSG00000242193.11	30	No Class	CRYZL2P	crystallin zeta like 2. pseudogene	Cluster002
ENSG00000242498.8	92	No Class	ARPIN	actin related protein 2/3 complex inhibitor	Cluster002
ENSG00000242574.9	59	No Class	HLA-DMB	major histocompatibility complex. class II. DM beta	Cluster002
ENSG00000244165.2	3	No Class	P2RY11	purinergic receptor P2Y11	Cluster002
ENSG00000244274.7	103	No Class	DBNDD2	dysbindin domain containing 2	Cluster002
ENSG00000247746.4	10	No Class	USP51	ubiquitin specific peptidase 51	Cluster002
ENSG00000254595.1	1	No Class	AC084337.1	voltage-dependent anion channel 1(VDAC1) pseudogene	Cluster002
ENSG00000254827.6	18	No Class	SLC22A18AS	solute carrier family 22 member 18 antisense	Cluster002
ENSG00000255819.7	12	No Class	KLRC4-KLRK1	KLRC4-KLRK1 readthrough	Cluster002
ENSG00000257108.2	59	No Class	NHLRC4	NHL repeat containing 4	Cluster002
ENSG00000257838.5	23	No Class	OTOAP1	OTOA pseudogene 1	Cluster002
ENSG00000257838.5.1	22	No Class	OTOAP1	OTOA pseudogene 1	Cluster002
ENSG00000258659.6	138	No Class	TRIM34	tripartite motif containing 34	Cluster002
ENSG00000262599.5	35	No Class	DENND11	DENN domain containing 11	Cluster002
ENSG00000263647.1	117	No Class	BPTFP1	bromodomain PHD finger transcription factor pseudogene 1	Cluster002
ENSG00000266714.9	50	No Class	MYO15B	myosin XVB	Cluster002
ENSG00000266820.1	55	No Class	KPNA2P3	karyopherin subunit alpha 2 pseudogene 3	Cluster002
ENSG00000267102.1	53	No Class	AC060766.1	RAB32. member RAS oncogene family (RAB32) pseudogene	Cluster002
ENSG00000267221.3	46	No Class	C17orf113	chromosome 17 open reading frame 113	Cluster002
ENSG00000267648.1	11	No Class	AC060766.5	DTW domain containing 2 (DTWD2) pseudogene	Cluster002
ENSG00000267648.1.1	11	No Class	AC060766.5	DTW domain containing 2 (DTWD2) pseudogene	Cluster002
ENSG00000275990.3	21	No Class	NCF4	neutrophil cytosolic factor 4	Cluster002
ENSG00000276068.4	11	No Class	NAIP	NLR family apoptosis inhibitory protein	Cluster002
ENSG00000276130.4	37	No Class	SLC22A18	solute carrier family 22 member 18	Cluster002
ENSG00000276497.3	158	No Class	APBA1	amyloid beta precursor protein binding family A member 1	Cluster002
ENSG00000281614.3	154	No Class	INPP5D	inositol polyphosphate-5-phosphatase D	Cluster002
ENSG00000281883.1	17	No Class	AL512506.3	novel transcript	Cluster002
ENSG00000282928.2	28	No Class	MAP4K1	mitogen-activated protein kinase kinase kinase kinase 1	Cluster002
ENSG00000283189.2	51	No Class	AC104452.1	novel protein	Cluster002
ENSG00000283930.1	1	No Class	AL117339.5	novel transcript	Cluster002
ENSG00000285199.1	70	No Class	CIDEB	cell death inducing DFFA like effector b	Cluster002
ENSG00000285456.2	10	No Class	LTB4R	leukotriene B4 receptor	Cluster002

## Sheet: Cluster 04
Name	Connections	Default Classes	Gene_ID	Gene_description	MCL_1.7_6
ENSG00000008083.14	11	No Class	JARID2	jumonji and AT-rich interaction domain containing 2	Cluster004
ENSG00000011422.12	29	No Class	PLAUR	plasminogen activator. urokinase receptor	Cluster004
ENSG00000013588.8	25	No Class	GPRC5A	G protein-coupled receptor class C group 5 member A	Cluster004
ENSG00000013619.14	30	No Class	MAMLD1	mastermind like domain containing 1	Cluster004
ENSG00000019144.19	35	No Class	PHLDB1	pleckstrin homology like domain family B member 1	Cluster004
ENSG00000034152.19	51	No Class	MAP2K3	mitogen-activated protein kinase kinase 3	Cluster004
ENSG00000034677.13	11	No Class	RNF19A	ring finger protein 19A. RBR E3 ubiquitin protein ligase	Cluster004
ENSG00000042062.13	11	No Class	RIPOR3	RIPOR family member 3	Cluster004
ENSG00000043462.12	4	No Class	LCP2	lymphocyte cytosolic protein 2	Cluster004
ENSG00000056558.11.1	18	No Class	TRAF1	TNF receptor associated factor 1	Cluster004
ENSG00000065809.13	37	No Class	FAM107B	family with sequence similarity 107 member B	Cluster004
ENSG00000066027.12	1	No Class	PPP2R5A	protein phosphatase 2 regulatory subunit B alpha	Cluster004
ENSG00000070961.15	39	No Class	ATP2B1	ATPase plasma membrane Ca2+ transporting 1	Cluster004
ENSG00000075426.12	51	No Class	FOSL2	FOS like 2. AP-1 transcription factor subunit	Cluster004
ENSG00000075426.12.1	19	No Class	FOSL2	FOS like 2. AP-1 transcription factor subunit	Cluster004
ENSG00000076382.17	23	No Class	SPAG5	sperm associated antigen 5	Cluster004
ENSG00000077782.20	10	No Class	FGFR1	fibroblast growth factor receptor 1	Cluster004
ENSG00000078269.15	6	No Class	SYNJ2	synaptojanin 2	Cluster004
ENSG00000078401.7	14	No Class	EDN1	endothelin 1	Cluster004
ENSG00000081041.9	5	No Class	CXCL2	C-X-C motif chemokine ligand 2	Cluster004
ENSG00000088320.4	6	No Class	REM1	RRAD and GEM like GTPase 1	Cluster004
ENSG00000088320.4.1	5	No Class	REM1	RRAD and GEM like GTPase 1	Cluster004
ENSG00000088826.18	14	No Class	SMOX	spermine oxidase	Cluster004
ENSG00000090104.12	13	No Class	RGS1	regulator of G protein signaling 1	Cluster004
ENSG00000090339.9	34	No Class	ICAM1	intercellular adhesion molecule 1	Cluster004
ENSG00000099625.13	10	No Class	CBARP	CACN subunit beta associated regulatory protein	Cluster004
ENSG00000100906.10	19	No Class	NFKBIA	NFKB inhibitor alpha	Cluster004
ENSG00000101384.12	35	No Class	JAG1	jagged canonical Notch ligand 1	Cluster004
ENSG00000101665.9	21	No Class	SMAD7	SMAD family member 7	Cluster004
ENSG00000102760.13	23	No Class	RGCC	regulator of cell cycle	Cluster004
ENSG00000102804.15	7	No Class	TSC22D1	TSC22 domain family member 1	Cluster004
ENSG00000103257.9	35	No Class	SLC7A5	solute carrier family 7 member 5	Cluster004
ENSG00000104885.18	60	No Class	DOT1L	DOT1 like histone lysine methyltransferase	Cluster004
ENSG00000105717.14	5	No Class	PBX4	PBX homeobox 4	Cluster004
ENSG00000106089.12	23	No Class	STX1A	syntaxin 1A	Cluster004
ENSG00000108179.14	20	No Class	PPIF	peptidylprolyl isomerase F	Cluster004
ENSG00000109320.13	63	No Class	NFKB1	nuclear factor kappa B subunit 1	Cluster004
ENSG00000109321.11	17	No Class	AREG	amphiregulin	Cluster004
ENSG00000110047.18	40	No Class	EHD1	EH domain containing 1	Cluster004
ENSG00000113070.8	1	No Class	HBEGF	heparin binding EGF like growth factor	Cluster004
ENSG00000115738.10	9	No Class	ID2	inhibitor of DNA binding 2	Cluster004
ENSG00000115956.10	19	No Class	PLEK	pleckstrin	Cluster004
ENSG00000117036.12	31	No Class	ETV3	ETS variant transcription factor 3	Cluster004
ENSG00000117525.14	25	No Class	F3	coagulation factor III. tissue factor	Cluster004
ENSG00000119508.18	17	No Class	NR4A3	nuclear receptor subfamily 4 group A member 3	Cluster004
ENSG00000120129.6	53	No Class	DUSP1	dual specificity phosphatase 1	Cluster004
ENSG00000120337.8	1	No Class	TNFSF18	TNF superfamily member 18	Cluster004
ENSG00000120875.9	12	No Class	DUSP4	dual specificity phosphatase 4	Cluster004
ENSG00000123342.16	40	No Class	MMP19	matrix metallopeptidase 19	Cluster004
ENSG00000123358.20	3	No Class	NR4A1	nuclear receptor subfamily 4 group A member 1	Cluster004
ENSG00000123908.12	35	No Class	AGO2	argonaute RISC catalytic component 2	Cluster004
ENSG00000123983.14	4	No Class	ACSL3	acyl-CoA synthetase long chain family member 3	Cluster004
ENSG00000124731.13	1	No Class	TREM1	triggering receptor expressed on myeloid cells 1	Cluster004
ENSG00000124882.4	29	No Class	EREG	epiregulin	Cluster004
ENSG00000125845.7	1	No Class	BMP2	bone morphogenetic protein 2	Cluster004
ENSG00000127124.16	22	No Class	HIVEP3	HIVEP zinc finger 3	Cluster004
ENSG00000128271.22	36	No Class	ADORA2A	adenosine A2a receptor	Cluster004
ENSG00000130052.13	1	No Class	STARD8	StAR related lipid transfer domain containing 8	Cluster004
ENSG00000130222.11	2	No Class	GADD45G	growth arrest and DNA damage inducible gamma	Cluster004
ENSG00000131873.7	32	No Class	CHSY1	chondroitin sulfate synthase 1	Cluster004
ENSG00000132510.10	39	No Class	KDM6B	lysine demethylase 6B	Cluster004
ENSG00000133639.6	46	No Class	BTG1	BTG anti-proliferation factor 1	Cluster004
ENSG00000134531.10	28	No Class	EMP1	epithelial membrane protein 1	Cluster004
ENSG00000134954.14	11	No Class	ETS1	ETS proto-oncogene 1. transcription factor	Cluster004
ENSG00000135476.12	32	No Class	ESPL1	extra spindle pole bodies like 1. separase	Cluster004
ENSG00000136158.12	16	No Class	SPRY2	sprouty RTK signaling antagonist 2	Cluster004
ENSG00000136630.13	8	No Class	HLX	H2.0 like homeobox	Cluster004
ENSG00000136997.19	3	No Class	MYC	MYC proto-oncogene. bHLH transcription factor	Cluster004
ENSG00000137094.14	37	No Class	DNAJB5	DnaJ heat shock protein family (Hsp40) member B5	Cluster004
ENSG00000137265.15	9	No Class	IRF4	interferon regulatory factor 4	Cluster004
ENSG00000137309.20	16	No Class	HMGA1	high mobility group AT-hook 1	Cluster004
ENSG00000137507.11	7	No Class	LRRC32	leucine rich repeat containing 32	Cluster004
ENSG00000137936.18	50	No Class	BCAR3	BCAR3 adaptor protein. NSP family member	Cluster004
ENSG00000138166.6	48	No Class	DUSP5	dual specificity phosphatase 5	Cluster004
ENSG00000139289.13	43	No Class	PHLDA1	pleckstrin homology like domain family A member 1	Cluster004
ENSG00000139318.8	32	No Class	DUSP6	dual specificity phosphatase 6	Cluster004
ENSG00000140022.13	2	No Class	STON2	stonin 2	Cluster004
ENSG00000144655.15	51	No Class	CSRNP1	cysteine and serine rich nuclear protein 1	Cluster004
ENSG00000145779.8	17	No Class	TNFAIP8	TNF alpha induced protein 8	Cluster004
ENSG00000145779.8.1	17	No Class	TNFAIP8	TNF alpha induced protein 8	Cluster004
ENSG00000146457.16	30	No Class	WTAP	WT1 associated protein	Cluster004
ENSG00000148841.17	4	No Class	ITPRIP	inositol 1.4.5-trisphosphate receptor interacting protein	Cluster004
ENSG00000151247.12	45	No Class	EIF4E	eukaryotic translation initiation factor 4E	Cluster004
ENSG00000155090.15	28	No Class	KLF10	Kruppel like factor 10	Cluster004
ENSG00000157557.13	44	No Class	ETS2	ETS proto-oncogene 2. transcription factor	Cluster004
ENSG00000158050.5	20	No Class	DUSP2	dual specificity phosphatase 2	Cluster004
ENSG00000158470.5	1	No Class	B4GALT5	beta-1.4-galactosyltransferase 5	Cluster004
ENSG00000160460.16	14	No Class	AC020929.1	spectrin beta. non-erythrocytic 4	Cluster004
ENSG00000160791.13	2	No Class	CCR5	C-C motif chemokine receptor 5 (gene/pseudogene)	Cluster004
ENSG00000162645.13	2	No Class	GBP2	guanylate binding protein 2	Cluster004
ENSG00000163082.10	12	No Class	SGPP2	sphingosine-1-phosphate phosphatase 2	Cluster004
ENSG00000163734.4	6	No Class	CXCL3	C-X-C motif chemokine ligand 3	Cluster004
ENSG00000163739.5	6	No Class	CXCL1	C-X-C motif chemokine ligand 1	Cluster004
ENSG00000163874.11	5	No Class	ZC3H12A	zinc finger CCCH-type containing 12A	Cluster004
ENSG00000164683.17	12	No Class	HEY1	hes related family bHLH transcription factor with YRPW motif 1	Cluster004
ENSG00000165685.8	2	No Class	TMEM52B	transmembrane protein 52B	Cluster004
ENSG00000166341.8	12	No Class	DCHS1	dachsous cadherin-related 1	Cluster004
ENSG00000166592.12	10	No Class	RRAD	RRAD. Ras related glycolysis inhibitor and calcium channel regulator	Cluster004
ENSG00000167470.12	12	No Class	MIDN	midnolin	Cluster004
ENSG00000167604.14	31	No Class	NFKBID	NFKB inhibitor delta	Cluster004
ENSG00000167874.7	18	No Class	TMEM88	transmembrane protein 88	Cluster004
ENSG00000168389.17	7	No Class	MFSD2A	major facilitator superfamily domain containing 2A	Cluster004
ENSG00000171223.6	9	No Class	JUNB	JunB proto-oncogene. AP-1 transcription factor subunit	Cluster004
ENSG00000171621.14	24	No Class	SPSB1	splA/ryanodine receptor domain and SOCS box containing 1	Cluster004
ENSG00000173334.4	12	No Class	TRIB1	tribbles pseudokinase 1	Cluster004
ENSG00000173391.9	18	No Class	OLR1	oxidized low density lipoprotein receptor 1	Cluster004
ENSG00000173451.7	15	No Class	THAP2	THAP domain containing 2	Cluster004
ENSG00000173546.7	8	No Class	CSPG4	chondroitin sulfate proteoglycan 4	Cluster004
ENSG00000173846.13	27	No Class	PLK3	polo like kinase 3	Cluster004
ENSG00000175505.11	37	No Class	CLCF1	cardiotrophin like cytokine factor 1	Cluster004
ENSG00000175592.9	21	No Class	FOSL1	FOS like 1. AP-1 transcription factor subunit	Cluster004
ENSG00000175592.9.1	61	No Class	FOSL1	FOS like 1. AP-1 transcription factor subunit	Cluster004
ENSG00000179388.9	1	No Class	EGR3	early growth response 3	Cluster004
ENSG00000179833.4	37	No Class	SERTAD2	SERTA domain containing 2	Cluster004
ENSG00000183484.12	6	No Class	GPR132	G protein-coupled receptor 132	Cluster004
ENSG00000184588.18	17	No Class	PDE4B	phosphodiesterase 4B	Cluster004
ENSG00000188389.11	4	No Class	PDCD1	programmed cell death 1	Cluster004
ENSG00000196396.10	26	No Class	PTPN1	protein tyrosine phosphatase non-receptor type 1	Cluster004
ENSG00000197632.9	9	No Class	SERPINB2	serpin family B member 2	Cluster004
ENSG00000198355.5	43	No Class	PIM3	Pim-3 proto-oncogene. serine/threonine kinase	Cluster004
ENSG00000198805.11	32	No Class	PNP	purine nucleoside phosphorylase	Cluster004
ENSG00000204099.11	17	No Class	NEU4	neuraminidase 4	Cluster004
ENSG00000204490.3	22	No Class	TNF	tumor necrosis factor	Cluster004
ENSG00000205710.4	5	No Class	C17orf107	chromosome 17 open reading frame 107	Cluster004
ENSG00000206439.5	22	No Class	TNF	tumor necrosis factor	Cluster004
ENSG00000223952.3	19	No Class	TNF	tumor necrosis factor	Cluster004
ENSG00000224080.1	24	No Class	UBE2FP1	UBE2F pseudogene 1	Cluster004
ENSG00000228321.3	21	No Class	TNF	tumor necrosis factor	Cluster004
ENSG00000228849.3	21	No Class	TNF	tumor necrosis factor	Cluster004
ENSG00000229781.1.1	11	No Class	AC013444.1	RRN3 RNA polymerase I transcription factor homolog (S. cerevisiae) (RRN3) pseudogene	Cluster004
ENSG00000230108.3	21	No Class	TNF	tumor necrosis factor	Cluster004
ENSG00000232810.4	3	No Class	TNF	tumor necrosis factor	Cluster004
ENSG00000237522.1	1	No Class	NONOP2	non-POU domain containing. octamer-binding pseudogene 2	Cluster004
ENSG00000253626.3	1	No Class	EIF5AL1	eukaryotic translation initiation factor 5A like 1	Cluster004
ENSG00000271810.5	16	No Class	AL603832.3	novel protein. PPM1J-RHOC readthrough	Cluster004
ENSG00000275824.4	12	No Class	CCL4	C-C motif chemokine ligand 4	Cluster004
ENSG00000276977.3	12	No Class	PDCD1	programmed cell death 1	Cluster004
ENSG00000277926.4	17	No Class	NEU4	neuraminidase 4	Cluster004
ENSG00000277943.4	12	No Class	CCL4	C-C motif chemokine ligand 4	Cluster004
ENSG00000281766.3	22	No Class	RYBP	RING1 and YY1 binding protein	Cluster004

## Sheet: Cluster 5
Name	Connections	Default Classes	Gene_ID	Gene_description	MCL_1.7_6
ENSG00000003402.20	59	No Class	CFLAR	CASP8 and FADD like apoptosis regulator	Cluster005
ENSG00000003402.20.1	58	No Class	CFLAR	CASP8 and FADD like apoptosis regulator	Cluster005
ENSG00000008294.21	60	No Class	SPAG9	sperm associated antigen 9	Cluster005
ENSG00000008405.12	12	No Class	CRY1	cryptochrome circadian regulator 1	Cluster005
ENSG00000010818.10	24	No Class	HIVEP2	HIVEP zinc finger 2	Cluster005
ENSG00000023909.10	1	No Class	GCLM	glutamate-cysteine ligase modifier subunit	Cluster005
ENSG00000049759.18	19	No Class	NEDD4L	NEDD4 like E3 ubiquitin protein ligase	Cluster005
ENSG00000049759.18.1	19	No Class	NEDD4L	NEDD4 like E3 ubiquitin protein ligase	Cluster005
ENSG00000052795.13	16	No Class	FNIP2	folliculin interacting protein 2	Cluster005
ENSG00000056558.11	22	No Class	TRAF1	TNF receptor associated factor 1	Cluster005
ENSG00000067057.17	1	No Class	PFKP	phosphofructokinase. platelet	Cluster005
ENSG00000067334.14	28	No Class	DNTTIP2	deoxynucleotidyltransferase terminal interacting protein 2	Cluster005
ENSG00000069956.12	32	No Class	MAPK6	mitogen-activated protein kinase 6	Cluster005
ENSG00000073756.12	1	No Class	PTGS2	prostaglandin-endoperoxide synthase 2	Cluster005
ENSG00000075420.13	36	No Class	FNDC3B	fibronectin type III domain containing 3B	Cluster005
ENSG00000077150.20	12	No Class	NFKB2	nuclear factor kappa B subunit 2	Cluster005
ENSG00000077238.14	23	No Class	IL4R	interleukin 4 receptor	Cluster005
ENSG00000078114.18	12	No Class	NEBL	nebulette	Cluster005
ENSG00000078804.13	26	No Class	TP53INP2	tumor protein p53 inducible nuclear protein 2	Cluster005
ENSG00000082153.18	43	No Class	BZW1	basic leucine zipper and W2 domains 1	Cluster005
ENSG00000093167.18	24	No Class	LRRFIP2	LRR binding FLII interacting protein 2	Cluster005
ENSG00000093167.18.1	23	No Class	LRRFIP2	LRR binding FLII interacting protein 2	Cluster005
ENSG00000102908.22	8	No Class	NFAT5	nuclear factor of activated T cells 5	Cluster005
ENSG00000104312.8	9	No Class	RIPK2	receptor interacting serine/threonine kinase 2	Cluster005
ENSG00000104643.10	19	No Class	MTMR9	myotubularin related protein 9	Cluster005
ENSG00000106546.14	4	No Class	AHR	aryl hydrocarbon receptor	Cluster005
ENSG00000106617.14	19	No Class	PRKAG2	protein kinase AMP-activated non-catalytic subunit gamma 2	Cluster005
ENSG00000108448.21	4	No Class	TRIM16L	tripartite motif containing 16 like	Cluster005
ENSG00000108510.10	39	No Class	MED13	mediator complex subunit 13	Cluster005
ENSG00000108671.11	9	No Class	PSMD11	proteasome 26S subunit. non-ATPase 11	Cluster005
ENSG00000112149.10	3	No Class	CD83	CD83 molecule	Cluster005
ENSG00000112394.17	1	No Class	SLC16A10	solute carrier family 16 member 10	Cluster005
ENSG00000114423.22	17	No Class	CBLB	Cbl proto-oncogene B	Cluster005
ENSG00000115009.13	10	No Class	CCL20	C-C motif chemokine ligand 20	Cluster005
ENSG00000115963.13	13	No Class	RND3	Rho family GTPase 3	Cluster005
ENSG00000116675.16	8	No Class	DNAJC6	DnaJ heat shock protein family (Hsp40) member C6	Cluster005
ENSG00000117009.12	35	No Class	KMO	kynurenine 3-monooxygenase	Cluster005
ENSG00000117143.13	6	No Class	UAP1	UDP-N-acetylglucosamine pyrophosphorylase 1	Cluster005
ENSG00000118503.15	29	No Class	TNFAIP3	TNF alpha induced protein 3	Cluster005
ENSG00000118503.15.1	29	No Class	TNFAIP3	TNF alpha induced protein 3	Cluster005
ENSG00000119139.20	31	No Class	TJP2	tight junction protein 2	Cluster005
ENSG00000121579.13	7	No Class	NAA50	N(alpha)-acetyltransferase 50. NatE catalytic subunit	Cluster005
ENSG00000121797.10	4	No Class	CCRL2	C-C motif chemokine receptor like 2	Cluster005
ENSG00000124145.6	5	No Class	SDC4	syndecan 4	Cluster005
ENSG00000124201.15	24	No Class	ZNFX1	zinc finger NFX1-type containing 1	Cluster005
ENSG00000124788.18	17	No Class	ATXN1	ataxin 1	Cluster005
ENSG00000125347.14	2	No Class	IRF1	interferon regulatory factor 1	Cluster005
ENSG00000125657.5	9	No Class	TNFSF9	TNF superfamily member 9	Cluster005
ENSG00000125657.5.1	9	No Class	TNFSF9	TNF superfamily member 9	Cluster005
ENSG00000125733.18	10	No Class	TRIP10	thyroid hormone receptor interactor 10	Cluster005
ENSG00000127955.17	3	No Class	GNAI1	G protein subunit alpha i1	Cluster005
ENSG00000132170.21	14	No Class	PPARG	peroxisome proliferator activated receptor gamma	Cluster005
ENSG00000132603.15	17	No Class	NIP7	nucleolar pre-rRNA processing protein NIP7	Cluster005
ENSG00000134070.5	49	No Class	IRAK2	interleukin 1 receptor associated kinase 2	Cluster005
ENSG00000135046.14	25	No Class	ANXA1	annexin A1	Cluster005
ENSG00000135604.10	39	No Class	STX11	syntaxin 11	Cluster005
ENSG00000138670.17	10	No Class	RASGEF1B	RasGEF domain family member 1B	Cluster005
ENSG00000139116.18	16	No Class	KIF21A	kinesin family member 21A	Cluster005
ENSG00000139514.13	15	No Class	SLC7A1	solute carrier family 7 member 1	Cluster005
ENSG00000139722.7	16	No Class	VPS37B	VPS37B subunit of ESCRT-I	Cluster005
ENSG00000140450.9	5	No Class	ARRDC4	arrestin domain containing 4	Cluster005
ENSG00000141664.10	4	No Class	ZCCHC2	zinc finger CCHC-type containing 2	Cluster005
ENSG00000143067.5	25	No Class	ZNF697	zinc finger protein 697	Cluster005
ENSG00000143322.21	52	No Class	ABL2	ABL proto-oncogene 2. non-receptor tyrosine kinase	Cluster005
ENSG00000145107.15	20	No Class	TM4SF19	transmembrane 4 L six family member 19	Cluster005
ENSG00000148339.12	14	No Class	SLC25A25	solute carrier family 25 member 25	Cluster005
ENSG00000149289.11	3	No Class	ZC3H12C	zinc finger CCCH-type containing 12C	Cluster005
ENSG00000150347.16	4	No Class	ARID5B	AT-rich interaction domain 5B	Cluster005
ENSG00000151014.6	2	No Class	NOCT	nocturnin	Cluster005
ENSG00000152413.15	12	No Class	HOMER1	homer scaffold protein 1	Cluster005
ENSG00000152484.14	37	No Class	USP12	ubiquitin specific peptidase 12	Cluster005
ENSG00000153391.15	8	No Class	INO80C	INO80 complex subunit C	Cluster005
ENSG00000154099.18	13	No Class	DNAAF1	dynein axonemal assembly factor 1	Cluster005
ENSG00000154710.17	41	No Class	RABGEF1	RAB guanine nucleotide exchange factor 1	Cluster005
ENSG00000157654.19	9	No Class	PALM2AKAP2	PALM2 and AKAP2 fusion	Cluster005
ENSG00000158186.13	7	No Class	MRAS	muscle RAS oncogene homolog	Cluster005
ENSG00000158615.9	27	No Class	PPP1R15B	protein phosphatase 1 regulatory subunit 15B	Cluster005
ENSG00000160712.13	39	No Class	IL6R	interleukin 6 receptor	Cluster005
ENSG00000162924.14	24	No Class	REL	REL proto-oncogene. NF-kB subunit	Cluster005
ENSG00000163376.11	14	No Class	KBTBD8	kelch repeat and BTB domain containing 8	Cluster005
ENSG00000163602.10	19	No Class	RYBP	RING1 and YY1 binding protein	Cluster005
ENSG00000164164.17	30	No Class	OTUD4	OTU deubiquitinase 4	Cluster005
ENSG00000164181.14	15	No Class	ELOVL7	ELOVL fatty acid elongase 7	Cluster005
ENSG00000164400.6	2	No Class	CSF2	colony stimulating factor 2	Cluster005
ENSG00000164543.7	39	No Class	STK17A	serine/threonine kinase 17a	Cluster005
ENSG00000165006.14	54	No Class	UBAP1	ubiquitin associated protein 1	Cluster005
ENSG00000165997.5	10	No Class	ARL5B	ADP ribosylation factor like GTPase 5B	Cluster005
ENSG00000166579.15	75	No Class	NDEL1	nudE neurodevelopment protein 1 like 1	Cluster005
ENSG00000168884.15	37	No Class	TNIP2	TNFAIP3 interacting protein 2	Cluster005
ENSG00000168884.15.1	37	No Class	TNIP2	TNFAIP3 interacting protein 2	Cluster005
ENSG00000169018.6	30	No Class	FEM1B	fem-1 homolog B	Cluster005
ENSG00000169155.10	61	No Class	ZBTB43	zinc finger and BTB domain containing 43	Cluster005
ENSG00000172071.14	7	No Class	EIF2AK3	eukaryotic translation initiation factor 2 alpha kinase 3	Cluster005
ENSG00000172530.20	1	No Class	BANP	BTG3 associated nuclear protein	Cluster005
ENSG00000172530.20.1	23	No Class	BANP	BTG3 associated nuclear protein	Cluster005
ENSG00000172939.9	22	No Class	OXSR1	oxidative stress responsive kinase 1	Cluster005
ENSG00000173812.11	6	No Class	EIF1	eukaryotic translation initiation factor 1	Cluster005
ENSG00000175352.11	57	No Class	NRIP3	nuclear receptor interacting protein 3	Cluster005
ENSG00000175556.17	4	No Class	LONRF3	LON peptidase N-terminal domain and ring finger 3	Cluster005
ENSG00000176597.12	19	No Class	B3GNT5	UDP-GlcNAc:betaGal beta-1.3-N-acetylglucosaminyltransferase 5	Cluster005
ENSG00000177173.5	4	No Class	NAP1L4P1	nucleosome assembly protein 1 like 4 pseudogene 1	Cluster005
ENSG00000177189.14	24	No Class	RPS6KA3	ribosomal protein S6 kinase A3	Cluster005
ENSG00000177606.7	20	No Class	JUN	Jun proto-oncogene. AP-1 transcription factor subunit	Cluster005
ENSG00000186591.13	41	No Class	UBE2H	ubiquitin conjugating enzyme E2 H	Cluster005
ENSG00000188522.15	39	No Class	FAM83G	family with sequence similarity 83 member G	Cluster005
ENSG00000196352.15	11	No Class	CD55	CD55 molecule (Cromer blood group)	Cluster005
ENSG00000196449.4	14	No Class	YRDC	yrdC N6-threonylcarbamoyltransferase domain containing	Cluster005
ENSG00000198406.7	1	No Class	BZW1P2	basic leucine zipper and W2 domains 1 pseudogene 2	Cluster005
ENSG00000198431.16	3	No Class	TXNRD1	thioredoxin reductase 1	Cluster005
ENSG00000198604.11	24	No Class	BAZ1A	bromodomain adjacent to zinc finger domain 1A	Cluster005
ENSG00000203668.2	10	No Class	CHML	CHM like Rab escort protein	Cluster005
ENSG00000203668.2.1	3	No Class	CHML	CHM like Rab escort protein	Cluster005
ENSG00000229419.1	1	No Class	RALGAPA1P1	Ral GTPase activating protein catalytic alpha subunit 1 pseudogene 1	Cluster005
ENSG00000242247.11	50	No Class	ARFGAP3	ADP ribosylation factor GTPase activating protein 3	Cluster005
ENSG00000243725.7	22	No Class	TTC4	tetratricopeptide repeat domain 4	Cluster005
ENSG00000274221.2	16	No Class	CCL3	C-C motif chemokine ligand 3	Cluster005
ENSG00000276463.4	1	No Class	TAF9	TATA-box binding protein associated factor 9	Cluster005
ENSG00000278165.3	30	No Class	DUSP8	dual specificity phosphatase 8	Cluster005
ENSG00000278567.2	16	No Class	CCL3	C-C motif chemokine ligand 3	Cluster005
ENSG00000284461.2	1	No Class	AC027644.4	novel transcript	Cluster005

## Sheet: Cluster 7
Name	Connections	Default Classes	Gene_ID	Gene_description	MCL_1.7_6
ENSG00000010610.10	69	No Class	CD4	CD4 molecule	Cluster007
ENSG00000011600.12	13	No Class	TYROBP	TYRO protein tyrosine kinase binding protein	Cluster007
ENSG00000019582.15	28	No Class	CD74	CD74 molecule	Cluster007
ENSG00000026297.15	37	No Class	RNASET2	ribonuclease T2	Cluster007
ENSG00000053918.18	27	No Class	KCNQ1	potassium voltage-gated channel subfamily Q member 1	Cluster007
ENSG00000085871.9	18	No Class	MGST2	microsomal glutathione S-transferase 2	Cluster007
ENSG00000086730.17	11	No Class	LAT2	linker for activation of T cells family member 2	Cluster007
ENSG00000088827.12	11	No Class	SIGLEC1	sialic acid binding Ig like lectin 1	Cluster007
ENSG00000088992.18	14	No Class	TESC	tescalcin	Cluster007
ENSG00000099282.10	49	No Class	TSPAN15	tetraspanin 15	Cluster007
ENSG00000100280.16	77	No Class	AP1B1	adaptor related protein complex 1 subunit beta 1	Cluster007
ENSG00000100600.15	1	No Class	LGMN	legumain	Cluster007
ENSG00000103202.13	27	No Class	NME4	NME/NM23 nucleoside diphosphate kinase 4	Cluster007
ENSG00000105048.17	1	No Class	TNNT1	troponin T1. slow skeletal type	Cluster007
ENSG00000105609.17	6	No Class	LILRB5	leukocyte immunoglobulin like receptor B5	Cluster007
ENSG00000106066.15	25	No Class	CPVL	carboxypeptidase vitellogenic like	Cluster007
ENSG00000111644.8	21	No Class	ACRBP	acrosin binding protein	Cluster007
ENSG00000112799.9	14	No Class	LY86	lymphocyte antigen 86	Cluster007
ENSG00000119655.10	24	No Class	NPC2	NPC intracellular cholesterol transporter 2	Cluster007
ENSG00000126246.10	71	No Class	IGFLR1	IGF like family receptor 1	Cluster007
ENSG00000129538.14	16	No Class	RNASE1	ribonuclease A family member 1. pancreatic	Cluster007
ENSG00000133112.16	6	No Class	TPT1	tumor protein. translationally-controlled 1	Cluster007
ENSG00000135363.12	26	No Class	LMO2	LIM domain only 2	Cluster007
ENSG00000136250.12	40	No Class	AOAH	acyloxyacyl hydrolase	Cluster007
ENSG00000137509.11	12	No Class	PRCP	prolylcarboxypeptidase	Cluster007
ENSG00000141574.8	22	No Class	SECTM1	secreted and transmembrane 1	Cluster007
ENSG00000146416.19	34	No Class	AIG1	androgen induced 1	Cluster007
ENSG00000147010.18	71	No Class	SH3KBP1	SH3 domain containing kinase binding protein 1	Cluster007
ENSG00000155849.15	27	No Class	ELMO1	engulfment and cell motility 1	Cluster007
ENSG00000157445.15	10	No Class	CACNA2D3	calcium voltage-gated channel auxiliary subunit alpha2delta 3	Cluster007
ENSG00000160014.17	31	No Class	CALM3	calmodulin 3	Cluster007
ENSG00000161944.16	7	No Class	ASGR2	asialoglycoprotein receptor 2	Cluster007
ENSG00000163815.6	19	No Class	CLEC3B	C-type lectin domain family 3 member B	Cluster007
ENSG00000164684.13	1	No Class	ZNF704	zinc finger protein 704	Cluster007
ENSG00000165475.15	79	No Class	CRYL1	crystallin lambda 1	Cluster007
ENSG00000170458.14	7	No Class	CD14	CD14 molecule	Cluster007
ENSG00000171766.16	16	No Class	GATM	glycine amidinotransferase	Cluster007
ENSG00000172824.16	13	No Class	CES4A	carboxylesterase 4A	Cluster007
ENSG00000173372.17	3	No Class	C1QA	complement C1q A chain	Cluster007
ENSG00000177675.8.1	7	No Class	CD163L1	CD163 molecule like 1	Cluster007
ENSG00000185201.16	3	No Class	IFITM2	interferon induced transmembrane protein 2	Cluster007
ENSG00000188130.14	18	No Class	MAPK12	mitogen-activated protein kinase 12	Cluster007
ENSG00000197629.6	43	No Class	MPEG1	macrophage expressed 1	Cluster007
ENSG00000204136.10	18	No Class	GGTA1P	glycoprotein alpha-galactosyltransferase 1. pseudogene	Cluster007
ENSG00000204397.8	15	No Class	CARD16	caspase recruitment domain family member 16	Cluster007
ENSG00000204472.13	42	No Class	AIF1	allograft inflammatory factor 1	Cluster007
ENSG00000205542.11	23	No Class	TMSB4X	thymosin beta 4 X-linked	Cluster007
ENSG00000206428.9	34	No Class	AIF1	allograft inflammatory factor 1	Cluster007
ENSG00000214063.11	17	No Class	TSPAN4	tetraspanin 4	Cluster007
ENSG00000234836.7	13	No Class	AIF1	allograft inflammatory factor 1	Cluster007
ENSG00000235588.8	34	No Class	AIF1	allograft inflammatory factor 1	Cluster007
ENSG00000237727.7	5	No Class	AIF1	allograft inflammatory factor 1	Cluster007
ENSG00000267120.3	12	No Class	AD000671.2	novel transcript	Cluster007
ENSG00000283602.1	34	No Class	AC116353.6	novel pseudogene	Cluster007

## Sheet: Cluster 8
Name	Connections	Default Classes	Gene_ID	Gene_description	MCL_1.7_6
ENSG00000030110.13	26	No Class	BAK1	BCL2 antagonist/killer 1	Cluster008
ENSG00000085377.14	8	No Class	PREP	prolyl endopeptidase	Cluster008
ENSG00000085644.14	28	No Class	ZNF213	zinc finger protein 213	Cluster008
ENSG00000099821.14	6	No Class	POLRMT	RNA polymerase mitochondrial	Cluster008
ENSG00000101811.13	4	No Class	CSTF2	cleavage stimulation factor subunit 2	Cluster008
ENSG00000103266.11	1	No Class	STUB1	STIP1 homology and U-box containing protein 1	Cluster008
ENSG00000105519.17	2	No Class	CAPS	calcyphosine	Cluster008
ENSG00000112651.12	35	No Class	MRPL2	mitochondrial ribosomal protein L2	Cluster008
ENSG00000115649.16	8	No Class	CNPPD1	cyclin Pas1/PHO80 domain containing 1	Cluster008
ENSG00000123415.15	55	No Class	SMUG1	single-strand-selective monofunctional uracil-DNA glycosylase 1	Cluster008
ENSG00000125967.16	31	No Class	NECAB3	N-terminal EF-hand calcium binding protein 3	Cluster008
ENSG00000130305.17	24	No Class	NSUN5	NOP2/Sun RNA methyltransferase 5	Cluster008
ENSG00000130305.17.1	11	No Class	NSUN5	NOP2/Sun RNA methyltransferase 5	Cluster008
ENSG00000130309.11	8	No Class	COLGALT1	collagen beta(1-O)galactosyltransferase 1	Cluster008
ENSG00000130695.15	29	No Class	CEP85	centrosomal protein 85	Cluster008
ENSG00000132591.12	9	No Class	ERAL1	Era like 12S mitochondrial rRNA chaperone 1	Cluster008
ENSG00000136490.9	2	No Class	LIMD2	LIM domain containing 2	Cluster008
ENSG00000145214.14	15	No Class	DGKQ	diacylglycerol kinase theta	Cluster008
ENSG00000148308.17	57	No Class	GTF3C5	general transcription factor IIIC subunit 5	Cluster008
ENSG00000148334.15	48	No Class	PTGES2	prostaglandin E synthase 2	Cluster008
ENSG00000153443.13	15	No Class	UBALD1	UBA like domain containing 1	Cluster008
ENSG00000156990.14	9	No Class	RPUSD3	RNA pseudouridine synthase D3	Cluster008
ENSG00000159111.13	3	No Class	MRPL10	mitochondrial ribosomal protein L10	Cluster008
ENSG00000160410.15	27	No Class	SHKBP1	SH3KBP1 binding protein 1	Cluster008
ENSG00000160688.19	52	No Class	FLAD1	flavin adenine dinucleotide synthetase 1	Cluster008
ENSG00000163528.13	1	No Class	CHCHD4	coiled-coil-helix-coiled-coil-helix domain containing 4	Cluster008
ENSG00000168806.8	5	No Class	LCMT2	leucine carboxyl methyltransferase 2	Cluster008
ENSG00000170175.11	7	No Class	CHRNB1	cholinergic receptor nicotinic beta 1 subunit	Cluster008
ENSG00000171067.11	3	No Class	C11orf24	chromosome 11 open reading frame 24	Cluster008
ENSG00000172336.5	17	No Class	POP7	POP7 homolog. ribonuclease P/MRP subunit	Cluster008
ENSG00000173153.15	1	No Class	ESRRA	estrogen related receptor alpha	Cluster008
ENSG00000173465.8	1	No Class	ZNRD2	zinc ribbon domain containing 2	Cluster008
ENSG00000182325.11	14	No Class	FBXL6	F-box and leucine rich repeat protein 6	Cluster008
ENSG00000183307.4	4	No Class	TMEM121B	transmembrane protein 121B	Cluster008
ENSG00000184178.16	1	No Class	SCFD2	sec1 family domain containing 2	Cluster008
ENSG00000187147.18	47	No Class	RNF220	ring finger protein 220	Cluster008
ENSG00000188827.11	4	No Class	SLX4	SLX4 structure-specific endonuclease subunit	Cluster008
ENSG00000204316.12	9	No Class	MRPL38	mitochondrial ribosomal protein L38	Cluster008
ENSG00000231372.8	5	No Class	MICB	MHC class I polypeptide-related sequence B	Cluster008
ENSG00000263290.5	6	No Class	SCAMP3	secretory carrier membrane protein 3	Cluster008
ENSG00000283946.2	7	No Class	CHRNB1	cholinergic receptor nicotinic beta 1 subunit	Cluster008
ENSG00000284976.1	34	No Class	BX255925.3	novel RING finger protein	Cluster008
ENSG00000285442.2	3	No Class	FBXL6	F-box and leucine rich repeat protein 6	Cluster008

## Sheet: Cluster 9
Name	Connections	Default Classes	Gene_ID	Gene_description	MCL_1.7_6
ENSG00000012963.15	4	No Class	UBR7	ubiquitin protein ligase E3 component n-recognin 7 (putative)	Cluster009
ENSG00000068383.19	3	No Class	INPP5A	inositol polyphosphate-5-phosphatase A	Cluster009
ENSG00000070495.14	5	No Class	JMJD6	jumonji domain containing 6. arginine demethylase and lysine hydroxylase	Cluster009
ENSG00000072786.13	7	No Class	STK10	serine/threonine kinase 10	Cluster009
ENSG00000092820.18	5	No Class	EZR	ezrin	Cluster009
ENSG00000096070.19	7	No Class	BRPF3	bromodomain and PHD finger containing 3	Cluster009
ENSG00000101216.11	16	No Class	GMEB2	glucocorticoid modulatory element binding protein 2	Cluster009
ENSG00000102119.11	19	No Class	EMD	emerin	Cluster009
ENSG00000106635.8	11	No Class	BCL7B	BAF chromatin remodeling complex subunit BCL7B	Cluster009
ENSG00000107863.18	12	No Class	ARHGAP21	Rho GTPase activating protein 21	Cluster009
ENSG00000108175.17	2	No Class	ZMIZ1	zinc finger MIZ-type containing 1	Cluster009
ENSG00000111252.11	7	No Class	SH2B3	SH2B adaptor protein 3	Cluster009
ENSG00000121481.11	7	No Class	RNF2	ring finger protein 2	Cluster009
ENSG00000127666.9	6	No Class	TICAM1	toll like receptor adaptor molecule 1	Cluster009
ENSG00000128272.14	6	No Class	ATF4	activating transcription factor 4	Cluster009
ENSG00000130147.16	4	No Class	SH3BP4	SH3 domain binding protein 4	Cluster009
ENSG00000134815.19	5	No Class	DHX34	DExH-box helicase 34	Cluster009
ENSG00000141564.15	16	No Class	RPTOR	regulatory associated protein of MTOR complex 1	Cluster009
ENSG00000142227.11	1	No Class	EMP3	epithelial membrane protein 3	Cluster009
ENSG00000143622.11	15	No Class	RIT1	Ras like without CAAX 1	Cluster009
ENSG00000151929.9	11	No Class	BAG3	BCL2 associated athanogene 3	Cluster009
ENSG00000151929.9.1	11	No Class	BAG3	BCL2 associated athanogene 3	Cluster009
ENSG00000156304.15	39	No Class	SCAF4	SR-related CTD associated factor 4	Cluster009
ENSG00000178104.19	10	No Class	PDE4DIP	phosphodiesterase 4D interacting protein	Cluster009
ENSG00000178409.13	3	No Class	BEND3	BEN domain containing 3	Cluster009
ENSG00000179134.15	17	No Class	SAMD4B	sterile alpha motif domain containing 4B	Cluster009
ENSG00000185359.13	2	No Class	HGS	hepatocyte growth factor-regulated tyrosine kinase substrate	Cluster009
ENSG00000197063.11	12	No Class	MAFG	MAF bZIP transcription factor G	Cluster009
ENSG00000197063.11.1	12	No Class	MAFG	MAF bZIP transcription factor G	Cluster009
ENSG00000198018.7	2	No Class	ENTPD7	ectonucleoside triphosphate diphosphohydrolase 7	Cluster009
ENSG00000198900.6	19	No Class	TOP1	DNA topoisomerase I	Cluster009
ENSG00000203485.13	6	No Class	INF2	inverted formin. FH2 and WH2 domain containing	Cluster009
ENSG00000244462.8	22	No Class	RBM12	RNA binding motif protein 12	Cluster009
ENSG00000273559.5	3	No Class	CWC25	CWC25 spliceosome associated protein homolog	Cluster009

## Sheet: Cluster 10
Name	Connections	Default Classes	Gene_ID	Gene_description	MCL_1.7_6
ENSG00000023228.14	7	No Class	NDUFS1	NADH:ubiquinone oxidoreductase core subunit S1	Cluster010
ENSG00000035141.8	6	No Class	FAM136A	family with sequence similarity 136 member A	Cluster010
ENSG00000049167.14	8	No Class	ERCC8	ERCC excision repair 8. CSA ubiquitin ligase complex subunit	Cluster010
ENSG00000059691.12	11	No Class	GATB	glutamyl-tRNA amidotransferase subunit B	Cluster010
ENSG00000061794.13	21	No Class	MRPS35	mitochondrial ribosomal protein S35	Cluster010
ENSG00000070785.17	5	No Class	EIF2B3	eukaryotic translation initiation factor 2B subunit gamma	Cluster010
ENSG00000075336.12	4	No Class	TIMM21	translocase of inner mitochondrial membrane 21	Cluster010
ENSG00000100150.20	1	No Class	DEPDC5	DEP domain containing 5. GATOR1 subcomplex subunit	Cluster010
ENSG00000100216.6	6	No Class	TOMM22	translocase of outer mitochondrial membrane 22	Cluster010
ENSG00000100347.15	28	No Class	SAMM50	SAMM50 sorting and assembly machinery component	Cluster010
ENSG00000100714.17	12	No Class	MTHFD1	methylenetetrahydrofolate dehydrogenase. cyclohydrolase and formyltetrahydrofolate synthetase 1	Cluster010
ENSG00000114021.12	6	No Class	NIT2	nitrilase family member 2	Cluster010
ENSG00000114850.6	23	No Class	SSR3	signal sequence receptor subunit 3	Cluster010
ENSG00000117899.11	22	No Class	MESD	mesoderm development LRP chaperone	Cluster010
ENSG00000132313.15	8	No Class	MRPL35	mitochondrial ribosomal protein L35	Cluster010
ENSG00000139180.11	9	No Class	NDUFA9	NADH:ubiquinone oxidoreductase subunit A9	Cluster010
ENSG00000150768.15	6	No Class	DLAT	dihydrolipoamide S-acetyltransferase	Cluster010
ENSG00000151876.13	9	No Class	FBXO4	F-box protein 4	Cluster010
ENSG00000152359.15	6	No Class	POC5	POC5 centriolar protein	Cluster010
ENSG00000156709.14	4	No Class	AIFM1	apoptosis inducing factor mitochondria associated 1	Cluster010
ENSG00000159596.7	17	No Class	TMEM69	transmembrane protein 69	Cluster010
ENSG00000164494.12	6	No Class	PDSS2	decaprenyl diphosphate synthase subunit 2	Cluster010
ENSG00000165097.16	2	No Class	KDM1B	lysine demethylase 1B	Cluster010
ENSG00000165118.15	10	No Class	C9orf64	chromosome 9 open reading frame 64	Cluster010
ENSG00000166130.15	8	No Class	IKBIP	IKBKB interacting protein	Cluster010
ENSG00000167862.10	2	No Class	MRPL58	mitochondrial ribosomal protein L58	Cluster010
ENSG00000174446.13	20	No Class	SNAPC5	small nuclear RNA activating complex polypeptide 5	Cluster010
ENSG00000274523.5	11	No Class	RCC1L	RCC1 like	Cluster010
ENSG00000274523.5.1	11	No Class	RCC1L	RCC1 like	Cluster010
ENSG00000283447.2	7	No Class	NDUFS1	NADH:ubiquinone oxidoreductase core subunit S1	Cluster010

## Sheet: Cluster 11
Name	Connections	Default Classes	Gene_ID	Gene_description	MCL_1.7_6
ENSG00000007372.23	16	No Class	PAX6	paired box 6	Cluster011
ENSG00000031003.10	18	No Class	FAM13B	family with sequence similarity 13 member B	Cluster011
ENSG00000065357.20	21	No Class	DGKA	diacylglycerol kinase alpha	Cluster011
ENSG00000079102.16	14	No Class	RUNX1T1	RUNX1 partner transcriptional co-repressor 1	Cluster011
ENSG00000080298.15	7	No Class	RFX3	regulatory factor X3	Cluster011
ENSG00000125462.18	17	No Class	C1orf61	chromosome 1 open reading frame 61	Cluster011
ENSG00000136531.17	8	No Class	SCN2A	sodium voltage-gated channel alpha subunit 2	Cluster011
ENSG00000138738.10	13	No Class	PRDM5	PR/SET domain 5	Cluster011
ENSG00000139055.7	13	No Class	ERP27	endoplasmic reticulum protein 27	Cluster011
ENSG00000143921.9	13	No Class	ABCG8	ATP binding cassette subfamily G member 8	Cluster011
ENSG00000160117.16	4	No Class	ANKLE1	ankyrin repeat and LEM domain containing 1	Cluster011
ENSG00000168675.18	8	No Class	LDLRAD4	low density lipoprotein receptor class A domain containing 4	Cluster011
ENSG00000169327.5	16	No Class	OR5AU1	olfactory receptor family 5 subfamily AU member 1	Cluster011
ENSG00000169519.21	4	No Class	METTL15	methyltransferase like 15	Cluster011
ENSG00000177455.15	2	No Class	CD19	CD19 molecule	Cluster011
ENSG00000177535.8	16	No Class	OR2B11	olfactory receptor family 2 subfamily B member 11	Cluster011
ENSG00000179938.12	15	No Class	GOLGA8J	golgin A8 family member J	Cluster011
ENSG00000184906.11	1	No Class	AMYH02020865.1	methylenetetrahydrofolate dehydrogenase (NADP+ dependent) 1-like (MTHFD1L) pseudogene	Cluster011
ENSG00000196338.12	13	No Class	NLGN3	neuroligin 3	Cluster011
ENSG00000197753.11	1	No Class	LHFPL5	LHFPL tetraspan subfamily member 5	Cluster011
ENSG00000198208.12	11	No Class	RPS6KL1	ribosomal protein S6 kinase like 1	Cluster011
ENSG00000221890.4	13	No Class	NPTXR	neuronal pentraxin receptor	Cluster011
ENSG00000254537.1	11	No Class	AL137161.1	novel pseudogene	Cluster011
ENSG00000269226.7	1	No Class	TMSB15B	thymosin beta 15B	Cluster011

## Sheet: Cluster 12
Name	Connections	Default Classes	Gene_ID	Gene_description	MCL_1.7_6
ENSG00000001630.17	7	No Class	CYP51A1	cytochrome P450 family 51 subfamily A member 1	Cluster012
ENSG00000052802.13	7	No Class	MSMO1	methylsterol monooxygenase 1	Cluster012
ENSG00000067064.11	4	No Class	IDI1	isopentenyl-diphosphate delta isomerase 1	Cluster012
ENSG00000100075.10	22	No Class	SLC25A1	solute carrier family 25 member 1	Cluster012
ENSG00000104549.12	7	No Class	SQLE	squalene epoxidase	Cluster012
ENSG00000109084.14	3	No Class	TMEM97	transmembrane protein 97	Cluster012
ENSG00000109107.14	12	No Class	ALDOC	aldolase. fructose-bisphosphate C	Cluster012
ENSG00000109929.10	11	No Class	SC5D	sterol-C5-desaturase	Cluster012
ENSG00000110921.14	4	No Class	MVK	mevalonate kinase	Cluster012
ENSG00000112972.15	8	No Class	HMGCS1	3-hydroxy-3-methylglutaryl-CoA synthase 1	Cluster012
ENSG00000113161.16	1	No Class	HMGCR	3-hydroxy-3-methylglutaryl-CoA reductase	Cluster012
ENSG00000130164.14	4	No Class	LDLR	low density lipoprotein receptor	Cluster012
ENSG00000132196.14	12	No Class	HSD17B7	hydroxysteroid 17-beta dehydrogenase 7	Cluster012
ENSG00000134824.14	12	No Class	FADS2	fatty acid desaturase 2	Cluster012
ENSG00000149485.19	12	No Class	FADS1	fatty acid desaturase 1	Cluster012
ENSG00000149809.16	9	No Class	TM7SF2	transmembrane 7 superfamily member 2	Cluster012
ENSG00000164211.13	6	No Class	STARD4	StAR related lipid transfer domain containing 4	Cluster012
ENSG00000167508.12	13	No Class	MVD	mevalonate diphosphate decarboxylase	Cluster012
ENSG00000169710.9	2	No Class	FASN	fatty acid synthase	Cluster012
ENSG00000172893.15	3	No Class	DHCR7	7-dehydrocholesterol reductase	Cluster012
ENSG00000185813.10	10	No Class	PCYT2	phosphate cytidylyltransferase 2. ethanolamine	Cluster012
ENSG00000198911.12	2	No Class	SREBF2	sterol regulatory element binding transcription factor 2	Cluster012
ENSG00000284967.2	3	No Class	FDFT1	farnesyl-diphosphate farnesyltransferase 1	Cluster012

[truncated: 21 more sheets: Cluster 14, Cluster 15, Cluster 16, Cluster 17, Cluster 19, Cluster 21, Cluster 27, Cluster 29, Cluster 35, Cluster 37, Cluster 38, Cluster 40, Cluster 41, Cluster 62, Cluster 85, Cluster 89, Cluster 91, Cluster 94, Cluster 97, Cluster 98 …]
